# Supplementary material for: arrayMap: A Reference Resource for Genomic Copy Number Imbalances in Human Malignancies
Source: PLoS One. 2012 May 18;7(5):e36944. doi: 10.1371/journal.pone.0036944 (PMC3356349; doi:10.1371/journal.pone.0036944)
Supplement: Table S2 — Cancer entities grouped by ICD-O code. (XLS) [file pone.0036944.s007.xls]

## Sheet: Sheet1
Supplementary Table S2: Cancer entities grouped by ICD-O code
Morphology	ICD-O code	Number of samples
Infiltrating duct carcinoma, NOS	8500/3	6459
Adenocarcinoma, NOS	8140/3	4826
Acute myeloid leukemia, NOS	9861/3	2147
Glioblastoma, NOS	9440/3	1989
Acute lymphoblastic leukemia, NOS	9835/3	1614
Squamous cell carcinoma, NOS	8070/3	1359
Non-small cell carcinoma	8046/3	965
Neuroblastoma, NOS	9500/3	908
Medulloblastoma, NOS	9470/3	898
Carcinoma, NOS	8010/3	873
Malignant melanoma, NOS	8720/3	844
Clear cell renal cell carcinoma	8310/3	737
B-cell chronic lymphocytic leukemia/small lymphocytic lymphoma	9823/3	708
Diffuse large B-cell lymphoma, NOS	9680/3	638
Plasma cell myeloma	9732/3	559
follicular lymphoma, NOS	9690/3	558
Multiple myeloma	9731/3	558
Myelodysplastic syndrome, NOS	9989/3	551
Micropapillary serous carcinoma [C56.9]	8460/3	513
Hepatocellular carcinoma, NOS	8170/3	488
Endometrioid carcinoma, NOS	8380/3	433
Chronic myeloid leukemia, NOS	9863/3	330
Marginal zone lymphoma, NOS	9699/3	289
Renal cell carcinoma	8312/3	286
Mantle cell lymphoma	9673/3	278
Transitional cell carcinoma, NOS	8120/3	241
Gastrointestinal stromal tumor, malignant	8936/3	233
Splenic marginal zone lymphoma, NOS	9689/3	204
Ductal carcinoma in situ, NOS	8500/2	179
Adenoma, NOS	8140/0	179
Primitive neuroectodermal tumor, NOS	9473/3	179
Chronic myeloproliferative disease, NOS	9960/3	173
Adenocarcinoma, intestinal type	8144/3	167
Oligodendroglioma, NOS	9450/3	160
Serous adenocarcinoma, NOS	8441/3	155
Pilocytic astrocytoma	9421/1	154
Glioma, NOS	9380/3	145
Astrocytoma, NOS	9400/3	143
Ependymoma, NOS	9391/3	137
Medulloblastoma with extensive nodularity	9471/3	133
Osteosarcoma, NOS	9180/3	108
Peripheral T-cell lymphoma, NOS	9705/3	108
Small cell carcinoma, NOS	8041/3	100
Malignant lymphoma, B-cell NOS	9591/3	99
Precursor T-cell lymphoblastic leukemia	9837/3	99
Leiomyosarcoma, NOS	8890/3	93
Acute leukemia, NOS	9801/3	86
Astrocytoma, anaplastic	9401/3	80
Large cell medulloblastoma	9474/3	77
Burkitt lymphoma, NOS	9687/3	76
Alveolar rhabdomyosarcoma	8920/3	74
Chondrosarcoma, NOS	9220/3	73
Neurofibroma, NOS	9540/0	73
Chronic myelomonocytic leukemia, NOS	9945/3	73
Mucinous adenocarcinoma	8480/3	70
mycosis fungoides	9700/3	63
Atypical chronic myeloid leukemia, BCR/ABL negative	9876/3	63
papillary renal cell carcinoma	8260/3	63
Invasive lobular carcinoma	8520/3	62
Mesothelioma, NOS	9050/3	60
Acute promyelocytic leukemia [FAB type M3]	9866/3	56
Oligodendroglioma, anaplastic	9451/3	55
Glioma, mixed	9382/3	55
Ewing sarcoma	9260/3	52
Liposarcoma, dedifferentiated	8858/3	51
Chordoma, NOS	9370/3	49
Chronic idiopathic myelofibrosis	9961/3	48
Fibrosarcoma, NOS	8810/3	47
Sezary syndrome	9701/3	46
Squamous intraepithelial neoplasia, grade III	8077/2	46
Embryonal rhabdomyosarcoma	8910/3	46
Polycythemia vera	9950/3	45
Essential thrombocythemia	9962/3	45
Infiltrating duct and lobular carcinoma	8522/3	44
Malignant peripheral nerve sheath tumor	9540/3	44
Myxoinflammatory fibroblastic sarcoma	8811/3	43
Waldenstrom macroglobulinemia	9761/3	42
Mediastinal large B-cell lymphoma	9679/3	40
Liposarcoma, NOS	8850/3	38
Urothelial papilloma, NOS	8130/1	38
Adrenal cortical carcinoma	8370/3	36
Mixed germ cell tumor	9085/3	36
Undifferentiated sarcoma	8805/3	34
Medullary carcinoma, NOS	8510/3	33
Acute lymphoblastic leukemia, mature B-cell type	9826/3	31
Enteropathy type T-cell lymphoma	9717/3	31
Teratoma, malignant, NOS	9080/3	30
Lobular carcinoma in situ	8520/2	28
Basal cell carcinoma, NOS	8090/3	28
Merkel cell carcinoma	8247/3	26
Acute monoblastic leukemia with differentiation [FAB M5b]	9891/3	26
Retinoblastoma, NOS	9510/3	24
Liposarcoma, pleomorphic	8854/3	24
Sarcoma, NOS	8800/3	22
Superficial spreading melanoma	8743/3	22
Liposarcoma, myxoid	8852/3	21
Epithelial tumor, benign	8010/0	21
Carcinoma in situ, NOS	8010/2	20
Ganglioglioma	9505/1	20
Synovial sarcoma, monophasic	9041/3	20
Renal cell carcinoma, chromophobe	8317/3	19
Myoepithelioma	8982/0	19
Adenosquamous carcinoma	8560/3	19
Yolk sac tumor	9071/3	18
Oncocytoma	8290/0	18
Refractory anemia, NOS	9980/3	18
Rhabdomyosarcoma, NOS	8900/3	17
Pigmented dermatofibrosarcoma protuberans	8833/3	17
Seminoma, NOS	9061/3	17
Leukemia, NOS	9800/3	16
Intratubular germ cell neoplasia [C62._]	9064/2	16
Pineoblastoma	9362/3	16
Gastrointestinal stromal tumor, uncertain malignant potential	8936/1	15
Epithelioid mesothelioma, malignant	9052/3	15
Myoepithelial carcinoma	8562/3	14
Teratocarcinoma	9081/3	13
Olfactory neuroblastoma	9522/3	13
Pituitary carcinoma, NOS	8272/3	13
Precursor T-cell lymphoblastic lymphoma	9729/3	12
Prolymphocytic leukemia, T-cell type	9834/3	12
Hodgkin lymphoma, NOS	9650/3	12
Teratoma, benign	9080/0	12
Malignant lymphoma, NOS	9590/3	12
Hepatoblastoma	8970/3	12
Angiosarcoma	9120/3	11
Refractory anemia with ringed sideroblasts [RARS]	9982/3	11
Acute myeloblastic leukemia with maturation [FAB M2]	9874/3	11
Malignant lymphoma, lymphoplasmacytic	9671/3	10
Embryonal carcinoma, NOS	9070/3	9
Chondroblastic osteosarcoma	9181/3	8
Desmoplastic mesothelioma	9051/3	8
Precursor B-cell lymphoblastic lymphoma	9728/3	7
Large cell carcinoma, NOS	8012/3	7
Dendritic cell sarcoma, NOS	9757/3	7
Ductal carcinoma, cribriform type [C50._]	8201/3	7
meningioma, NOS	9530/0	7
Nephroblastoma, NOS	8960/3	7
Acute megakaryoblastic leukemia [FAB M7]	9910/3	7
Intraductal papillary-mucinous adenoma [C25._]	8453/0	7
Carcinoma, diffuse type	8145/3	7
Synovial sarcoma, NOS	9040/3	6
Acute myeloblastic leukemia without maturation [FAB type M1]	9873/3	6
Schwannoma, NOS	9560/0	5
Intraductal papillary-mucinous tumor with moderate dysplasia [C25._]	8453/1	5
Intraductal papillary-mucinous carcinoma, non-invasive [C25._]	8453/2	5
Nodular melanoma	8721/3	4
Refractory cytopenia with multilineage dysplasia	9985/3	4
Intraductal papillary-mucinous carcinoma, invasive [C25._]	8453/3	4
Synovial sarcoma, biphasic	9043/3	4
Basaloid squamous cell carcinoma	8083/3	4
Carcinoma, undifferentiated type, NOS	8020/3	3
Hepatocellular adenoma, NOS	8170/0	3
Gliosarcoma	9442/3	3
Germ cell tumor, nonseminomatous	9065/3	3
Fibroblastic osteosarcoma	9182/3	3
Precursor B-cell lymphoblastic leukemia	9836/3	3
Myelodysplastic syndrome with 5q- syndrome	9986/3	3
Refractory anemia with excess blasts [RAEB]	9983/3	3
Mesothelioma, biphasic, malignant	9053/3	3
Hypereosinophilic syndrome	9964/3	3
Tubular adenocarcinoma	8211/3	3
Epithelioma, malignant	8011/3	2
Carcinosarcoma, NOS	8980/3	2
Granular cell tumor	9582/0	2
DCIS, comedo type [C50._]	8501/2	2
Hemangioma, NOS	9120/0	2
Metaplastic carcinoma, NOS	8575/3	2
Inflammatory carcinoma	8530/3	2
Carcinoma, anaplastic type, NOS	8021/3	2
Acute myelomonocytic leukemia [FAB type M4]	9867/3	2
Atypical teratoid/rhabdoid tumor	9508/3	2
Meningioma, malignant	9530/3	2
Sarcomatoid carcinoma	8033/3	2
Pleomorphic xanthoastrocytoma	9424/3	2
Papillary transitional cell carcinoma	8130/3	2
Acinar cell carcinoma	8550/3	2
Endometrioid adenocarcinoma, secretory variant	8382/3	2
Germinoma	9064/3	1
Choriocarcinoma	9100/3	1
Myeloid leukemia, NOS	9860/3	1
Infiltrating lobular mixed with other types of carcinoma	8524/3	1
Adenocarcinoma in adenomatous polyp	8210/3	1
Osteosarcoma, telangiectatic	9183/3	1
Refractory anemia with excess blasts in transformation [RAEBT]	9984/3	1
Dysgerminoma	9060/3	1
Phyllodes tumor, malignant	9020/3	1
Desmoplastic fibroma	8823/0	1
Fibrous histiocytoma, malignant	8830/3	1
Inflammatory myofibroblastic tumour	8825/1	1
Solid carcinoma, NOS	8230/3	1
Apocrine adenocarcinoma	8401/3	1
Infiltrating duct mixed with other types of carcinoma [C50._]	8523/3	1
Paget disease and infiltrating duct carcinoma	8541/3	1
Bronchiolo-alveolar carcinoma, non-mucinous	8252/3	1
Total		36078
