# Supplementary material for: arrayMap: A Reference Resource for Genomic Copy Number Imbalances in Human Malignancies
Source: PLoS One. 2012 May 18;7(5):e36944. doi: 10.1371/journal.pone.0036944 (PMC3356349; doi:10.1371/journal.pone.0036944)
Supplement: Table S4 — Probe remapping rate for platforms. (XLS) [file pone.0036944.s009.xls]

## Sheet: Remapping Rate
Supplementary Table S4: Probe remapping rate for platforms
GPLID	GenomeVersion	ArrayType	SANGER/DECIPHER	UCSC database	IMAGEID clone	Total
GPL6181	Ensembl Ver49	BAC/P1	1			1
GPL2616	HG15	BAC/P1		0.99		0.99
GPL1432	HG16	BAC/P1	1			1
GPL2843	HG16	BAC/P1	0.97	0.03		1
GPL3441	HG16	BAC/P1	0.89	0.11		1
GPL7298	HG16	BAC/P1	0.98			0.98
GPL8186	HG16	BAC/P1	0.86	0.14		1
GPL8187	HG16	BAC/P1	0.91	0.09		1
GPL2735	HG17	BAC/P1		0.98		0.98
GPL3091	HG17	BAC/P1	0.98	0.02		1
GPL3455	HG17	BAC/P1	0.97	0.03		1
GPL3749	HG17	BAC/P1	0.81	0.19		1
GPL3789	HG17	BAC/P1	0.63			0.63
GPL3868	HG17	BAC/P1	0.97			0.97
GPL3869	HG17	BAC/P1	0.97			0.97
GPL3960	HG17	BAC/P1	0.81	0.19		1
GPL3993	HG17	BAC/P1	0.97			0.97
GPL4723	HG17	BAC/P1	0.78	0.2		0.98
GPL5000	HG17	BAC/P1	0.78	0.22		1
GPL5114	HG17	BAC/P1	0.8	0.2		1
GPL5840	HG17	BAC/P1	0.79			0.79
GPL5841	HG17	BAC/P1	0.92			0.92
GPL6520	HG17	BAC/P1	0.98	0.02		1
GPL6521	HG17	BAC/P1	0.98	0.02		1
GPL6737	HG17	BAC/P1	0.89	0.02		0.91
GPL6782	HG17	BAC/P1	1			1
GPL6783	HG17	BAC/P1	0.94	0.06		1
GPL7247	HG17	BAC/P1	0.79	0.2		0.99
GPL7394	HG17	BAC/P1	0.84	0.15		0.99
GPL8634	HG17	BAC/P1	0.91	0.06		0.97
GPL9077	HG17	BAC/P1	0.82	0.18		1
GPL13177	HG18	BAC/P1	NA	NA	NA	NA
GPL5338	HG18	BAC/P1	NA	NA	NA	NA
GPL5672	HG18	BAC/P1	NA	NA	NA	NA
GPL5772	HG18	BAC/P1	NA	NA	NA	NA
GPL6853	HG18	BAC/P1	NA	NA	NA	NA
GPL8690	HG18	BAC/P1	NA	NA	NA	NA
GPL9715	HG18	BAC/P1	NA	NA	NA	NA
GPL1003		BAC/P1	1			1
GPL1005		BAC/P1	1			1
GPL1048		BAC/P1	1			1
GPL13176		BAC/P1	NA	NA	NA	NA
GPL2024		BAC/P1	0.99			0.99
GPL2030		BAC/P1	0.91	0.09		1
GPL2043		BAC/P1		0.98		0.98
GPL28		BAC/P1	0.7	0.26		0.96
GPL2920		BAC/P1	0.99	0.004		0.994
GPL3778		BAC/P1	0.8	0.19		0.99
GPL3780		BAC/P1	0.88	0.1		0.98
GPL4560		BAC/P1	0.97			0.97
GPL4615		BAC/P1	0.97			0.97
GPL4894		BAC/P1	0.78	0.22		1
GPL4896		BAC/P1	0.99			0.99
GPL4939		BAC/P1	0.97	0.03		1
GPL5015		BAC/P1	0.95	0.05		1
GPL5452		BAC/P1	1			1
GPL5679		BAC/P1	0.91			0.91
GPL5685		BAC/P1	1			1
GPL5713		BAC/P1	1			1
GPL6575		BAC/P1	1			1
GPL7096		BAC/P1	0.97			0.97
GPL8175		BAC/P1	1			1
GPL1855	HG15	in situ oligonucleotide	NA	NA	NA	NA
GPL9797	HG16	in situ oligonucleotide	1			1
GPL1266	HG17	in situ oligonucleotide	NA	NA	NA	NA
GPL2004	HG17	in situ oligonucleotide	NA	NA	NA	NA
GPL2005	HG17	in situ oligonucleotide	NA	NA	NA	NA
GPL2641	HG17	in situ oligonucleotide	NA	NA	NA	NA
GPL2873	HG17	in situ oligonucleotide	1			1
GPL2879	HG17	in situ oligonucleotide	1			1
GPL3472	HG17	in situ oligonucleotide		1		1
GPL3481	HG17	in situ oligonucleotide		1		1
GPL3514	HG17	in situ oligonucleotide		1		1
GPL3718	HG17	in situ oligonucleotide	NA	NA	NA	NA
GPL3720	HG17	in situ oligonucleotide	NA	NA	NA	NA
GPL3811	HG17	in situ oligonucleotide	NA	NA	NA	NA
GPL4091	HG17	in situ oligonucleotide	1			1
GPL4093	HG17	in situ oligonucleotide	1			1
GPL4544	HG17	in situ oligonucleotide	1			1
GPL5477	HG17	in situ oligonucleotide	1			1
GPL5571	HG17	in situ oligonucleotide	1			1
GPL5790	HG17	in situ oligonucleotide		1		1
GPL6400	HG17	in situ oligonucleotide		1		1
GPL7203	HG17	in situ oligonucleotide	1			1
GPL7823	HG17	in situ oligonucleotide	1			1
GPL8581	HG17	in situ oligonucleotide		1		1
GPL8720	HG17	in situ oligonucleotide		1		1
GPL8841	HG17	in situ oligonucleotide	1			1
GPL9075	HG17	in situ oligonucleotide	1			1
GPL9128	HG17	in situ oligonucleotide	1			1
GPL9775	HG17	in situ oligonucleotide		1		1
GPL9776	HG17	in situ oligonucleotide		1		1
GPL9798	HG17	in situ oligonucleotide	1			1
GPL9816	HG17	in situ oligonucleotide		1		1
GPL10118	HG18	in situ oligonucleotide	NA	NA	NA	NA
GPL10123	HG18	in situ oligonucleotide	NA	NA	NA	NA
GPL10150	HG18	in situ oligonucleotide	NA	NA	NA	NA
GPL10197	HG18	in situ oligonucleotide	NA	NA	NA	NA
GPL10383	HG18	in situ oligonucleotide	NA	NA	NA	NA
GPL10461	HG18	in situ oligonucleotide	NA	NA	NA	NA
GPL13190	HG18	in situ oligonucleotide	NA	NA	NA	NA
GPL6801	HG18	in situ oligonucleotide	NA	NA	NA	NA
GPL6804	HG18	in situ oligonucleotide	NA	NA	NA	NA
GPL7313	HG18	in situ oligonucleotide	NA	NA	NA	NA
GPL7314	HG18	in situ oligonucleotide	NA	NA	NA	NA
GPL8226	HG18	in situ oligonucleotide	NA	NA	NA	NA
GPL8233	HG18	in situ oligonucleotide	NA	NA	NA	NA
GPL8687	HG18	in situ oligonucleotide	NA	NA	NA	NA
GPL8736	HG18	in situ oligonucleotide	NA	NA	NA	NA
GPL8737	HG18	in situ oligonucleotide	NA	NA	NA	NA
GPL9041	HG18	in situ oligonucleotide	NA	NA	NA	NA
GPL9042	HG18	in situ oligonucleotide	NA	NA	NA	NA
GPL9708	HG18	in situ oligonucleotide	NA	NA	NA	NA
GPL9944	HG18	in situ oligonucleotide	NA	NA	NA	NA
GPL10722		in situ oligonucleotide	1			1
GPL2014		in situ oligonucleotide	NA	NA	NA	NA
GPL2015		in situ oligonucleotide	NA	NA	NA	NA
GPL570		in situ oligonucleotide	NA	NA	NA	NA
GPL8036		in situ oligonucleotide	NA	NA	NA	NA
GPL8355		in situ oligonucleotide	1			1
GPL8693		in situ oligonucleotide	1			1
GPL887		in situ oligonucleotide		0.98		0.98
GPL9202		in situ oligonucleotide	NA	NA	NA	NA
GPL6986	HG18	oligonucleotide	NA	NA	NA	NA
GPL6979	HG17	oligonucleotide beads	1			1
GPL6980	HG18	oligonucleotide beads	NA	NA	NA	NA
GPL6981	HG18	oligonucleotide beads	NA	NA	NA	NA
GPL6982	HG18	oligonucleotide beads	NA	NA	NA	NA
GPL6984	HG18	oligonucleotide beads	NA	NA	NA	NA
GPL6985	HG18	oligonucleotide beads	NA	NA	NA	NA
GPL6988	HG18	oligonucleotide beads	NA	NA	NA	NA
GPL13135		oligonucleotide beads	NA	NA	NA	NA
GPL3896		oligonucleotide beads	NA	NA	NA	NA
GPL8882		oligonucleotide beads	NA	NA	NA	NA
GPL8887		oligonucleotide beads	NA	NA	NA	NA
GPL8888		oligonucleotide beads	NA	NA	NA	NA
GPL9336	Ensembl 22.34d.1	spotted DNA/cDNA	0.81			0.81
GPL8774	HG15	spotted DNA/cDNA		0.99		0.99
GPL2842	HG16	spotted DNA/cDNA	0.89	0.11		1
GPL3442	HG16	spotted DNA/cDNA	0.89	0.11		1
GPL3443	HG16	spotted DNA/cDNA	0.86	0.11		0.97
GPL13244	HG17	spotted DNA/cDNA	0.97			0.97
GPL4012	HG17	spotted DNA/cDNA	0.96	0.02		0.98
GPL5055	HG17	spotted DNA/cDNA	1			1
GPL5056	HG17	spotted DNA/cDNA	1			1
GPL6088	HG17	spotted DNA/cDNA	0.79			0.79
GPL6745	HG17	spotted DNA/cDNA	NA	NA	NA	NA
GPL7199	HG17	spotted DNA/cDNA	1			1
GPL6382	HG18	spotted DNA/cDNA	NA	NA	NA	NA
GPL6478	HG18	spotted DNA/cDNA	NA	NA	NA	NA
GPL6514	HG18	spotted DNA/cDNA	NA	NA	NA	NA
GPL1282	Stanford IMAGE ID	spotted DNA/cDNA			0.92	0.92
GPL1448	Stanford IMAGE ID	spotted DNA/cDNA			0.9	0.9
GPL1715	Stanford IMAGE ID	spotted DNA/cDNA			0.92	0.92
GPL179	Stanford IMAGE ID	spotted DNA/cDNA			0.96	0.96
GPL1831	Stanford IMAGE ID	spotted DNA/cDNA			0.92	0.92
GPL1998	Stanford IMAGE ID	spotted DNA/cDNA			0.98	0.98
GPL2013	Stanford IMAGE ID	spotted DNA/cDNA			0.98	0.98
GPL2790	Stanford IMAGE ID	spotted DNA/cDNA			0.94	0.94
GPL2830	Stanford IMAGE ID	spotted DNA/cDNA			0.97	0.97
GPL3254	Stanford IMAGE ID	spotted DNA/cDNA			0.94	0.94
GPL3291	Stanford IMAGE ID	spotted DNA/cDNA			0.92	0.92
GPL3332	Stanford IMAGE ID	spotted DNA/cDNA			0.94	0.94
GPL3355	Stanford IMAGE ID	spotted DNA/cDNA			0.92	0.92
GPL3372	Stanford IMAGE ID	spotted DNA/cDNA			0.94	0.94
GPL3381	Stanford IMAGE ID	spotted DNA/cDNA			0.92	0.92
GPL3382	Stanford IMAGE ID	spotted DNA/cDNA			0.94	0.94
GPL3383	Stanford IMAGE ID	spotted DNA/cDNA			0.94	0.94
GPL3522	Stanford IMAGE ID	spotted DNA/cDNA			0.92	0.92
GPL3523	Stanford IMAGE ID	spotted DNA/cDNA			0.94	0.94
GPL3524	Stanford IMAGE ID	spotted DNA/cDNA			0.94	0.94
GPL3528	Stanford IMAGE ID	spotted DNA/cDNA			0.92	0.92
GPL3895	Stanford IMAGE ID	spotted DNA/cDNA			0.97	0.97
GPL3898	Stanford IMAGE ID	spotted DNA/cDNA			0.92	0.92
GPL4482	Stanford IMAGE ID	spotted DNA/cDNA			0.81	0.81
GPL4483	Stanford IMAGE ID	spotted DNA/cDNA			0.92	0.92
GPL4505	Stanford IMAGE ID	spotted DNA/cDNA			0.77	0.77
GPL4639	Stanford IMAGE ID	spotted DNA/cDNA			0.94	0.94
GPL4640	Stanford IMAGE ID	spotted DNA/cDNA			0.94	0.94
GPL5620	Stanford IMAGE ID	spotted DNA/cDNA			0.94	0.94
GPL6317	Stanford IMAGE ID	spotted DNA/cDNA			0.92	0.92
GPL6318	Stanford IMAGE ID	spotted DNA/cDNA			0.94	0.94
GPL6319	Stanford IMAGE ID	spotted DNA/cDNA			0.97	0.97
GPL6320	Stanford IMAGE ID	spotted DNA/cDNA			0.97	0.97
GPL6321	Stanford IMAGE ID	spotted DNA/cDNA			0.97	0.97
GPL6322	Stanford IMAGE ID	spotted DNA/cDNA			0.94	0.94
GPL6323	Stanford IMAGE ID	spotted DNA/cDNA			0.94	0.94
GPL6468	Stanford IMAGE ID	spotted DNA/cDNA			0.94	0.94
GPL7321	Stanford IMAGE ID	spotted DNA/cDNA			0.86	0.86
GPL7322	Stanford IMAGE ID	spotted DNA/cDNA			0.84	0.84
GPL7323	Stanford IMAGE ID	spotted DNA/cDNA			0.86	0.86
GPL7324	Stanford IMAGE ID	spotted DNA/cDNA			0.86	0.86
GPL7325	Stanford IMAGE ID	spotted DNA/cDNA			0.86	0.86
GPL7778	Stanford IMAGE ID	spotted DNA/cDNA			0.86	0.86
GPL7779	Stanford IMAGE ID	spotted DNA/cDNA			0.86	0.86
GPL7780	Stanford IMAGE ID	spotted DNA/cDNA			0.86	0.86
GPL7781	Stanford IMAGE ID	spotted DNA/cDNA			0.84	0.84
GPL7782	Stanford IMAGE ID	spotted DNA/cDNA			0.86	0.86
GPL7783	Stanford IMAGE ID	spotted DNA/cDNA			0.83	0.83
GPL7784	Stanford IMAGE ID	spotted DNA/cDNA			0.86	0.86
GPL8641	Stanford IMAGE ID	spotted DNA/cDNA			0.82	0.82
GPL10093		spotted DNA/cDNA	NA	NA	NA	NA
GPL1424		spotted DNA/cDNA		1		1
GPL1506		spotted DNA/cDNA	0.87	0.09		0.96
GPL3632		spotted DNA/cDNA	0.99			0.99
GPL3887		spotted DNA/cDNA	1			1
GPL3888		spotted DNA/cDNA	0.99			0.99
GPL3889		spotted DNA/cDNA	1			1
GPL3892		spotted DNA/cDNA	0.86	0.1		0.96
GPL3893		spotted DNA/cDNA	0.99			0.99
GPL3894		spotted DNA/cDNA	0.89	0.1		0.99
GPL4003		spotted DNA/cDNA	1			1
GPL4242		spotted DNA/cDNA	1			1
GPL4453		spotted DNA/cDNA	NA	NA	NA	NA
GPL4998		spotted DNA/cDNA	1			1
GPL4999		spotted DNA/cDNA	1			1
GPL5749		spotted DNA/cDNA	0.99			0.99
GPL5750		spotted DNA/cDNA	0.99			0.99
GPL6359		spotted DNA/cDNA	0.99			0.99
GPL6365		spotted DNA/cDNA	1			1
GPL8999		spotted DNA/cDNA	1			1
GPL9189		spotted DNA/cDNA		0.99		0.99
GPL5046	HG16	spotted oligonucleotide		1		1
GPL2819	HG17	spotted oligonucleotide		0.96		0.96
GPL2826	HG17	spotted oligonucleotide		0.96		0.96
GPL2827	HG17	spotted oligonucleotide		0.97		0.97
GPL2834	HG17	spotted oligonucleotide		0.96		0.96
GPL3055	HG17	spotted oligonucleotide		0.96		0.96
GPL5149	HG17	spotted oligonucleotide	1			1
GPL5326	HG17	spotted oligonucleotide		1		1
GPL5711	HG17	spotted oligonucleotide	1			1
GPL8276	HG17	spotted oligonucleotide	1			1
GPL8368	HG17	spotted oligonucleotide		1		1
GPL8876	HG17	spotted oligonucleotide	0.96	0.02		0.98
GPL10452	HG18	spotted oligonucleotide	NA	NA	NA	NA
GPL5144	HG18	spotted oligonucleotide	NA	NA	NA	NA
GPL5737	HG18	spotted oligonucleotide	NA	NA	NA	NA
GPL9852	HG18	spotted oligonucleotide	NA	NA	NA	NA
GPL10001		spotted oligonucleotide	NA	NA	NA	NA
GPL9216		spotted oligonucleotide	NA	NA	NA	NA
GPL3054	HG16	spotted oligonucleotide/BAC/P1		0.94		0.94
