# Supplementary material for: arrayMap: A Reference Resource for Genomic Copy Number Imbalances in Human Malignancies
Source: PLoS One. 2012 May 18;7(5):e36944. doi: 10.1371/journal.pone.0036944 (PMC3356349; doi:10.1371/journal.pone.0036944)
Supplement: Table S5 — Processing method and threshold for calling genomic gains and losses. (XLS) [file pone.0036944.s010.xls]

## Sheet: Threshold
Supplementary Table S5: Processing method and threshold for calling genomic gains and losses
ArrayID	SeriesID	PlatformID	PubMedID	LossThreshold	GainThreshold	ProcessingMethod
GSM224836	GSE10128	GPL5772	18314908	-0.15	0.15	log value from GEO, segmented by DNAcopy/cbs
GSM224837	GSE10128	GPL5772	18314908	-0.15	0.15	log value from GEO, segmented by DNAcopy/cbs
GSM224843	GSE10128	GPL5772	18314908	-0.15	0.15	log value from GEO, segmented by DNAcopy/cbs
GSM224844	GSE10128	GPL5772	18314908	-0.15	0.15	log value from GEO, segmented by DNAcopy/cbs
GSM225154	GSE10128	GPL5772	18314908	-0.15	0.15	log value from GEO, segmented by DNAcopy/cbs
GSM225155	GSE10128	GPL5772	18314908	-0.15	0.15	log value from GEO, segmented by DNAcopy/cbs
GSM225156	GSE10128	GPL5772	18314908	-0.15	0.15	log value from GEO, segmented by DNAcopy/cbs
GSM225157	GSE10128	GPL5772	18314908	-0.15	0.15	log value from GEO, segmented by DNAcopy/cbs
GSM225158	GSE10128	GPL5772	18314908	-0.15	0.15	log value from GEO, segmented by DNAcopy/cbs
GSM225159	GSE10128	GPL5772	18314908	-0.15	0.15	log value from GEO, segmented by DNAcopy/cbs
GSM225160	GSE10128	GPL5772	18314908	-0.15	0.15	log value from GEO, segmented by DNAcopy/cbs
GSM225161	GSE10128	GPL5772	18314908	-0.15	0.15	log value from GEO, segmented by DNAcopy/cbs
GSM225162	GSE10128	GPL5772	18314908	-0.15	0.15	log value from GEO, segmented by DNAcopy/cbs
GSM225163	GSE10128	GPL5772	18314908	-0.15	0.15	log value from GEO, segmented by DNAcopy/cbs
GSM225164	GSE10128	GPL5772	18314908	-0.15	0.15	log value from GEO, segmented by DNAcopy/cbs
GSM225165	GSE10128	GPL5772	18314908	-0.15	0.15	log value from GEO, segmented by DNAcopy/cbs
GSM225180	GSE10128	GPL5772	18314908	-0.15	0.15	log value from GEO, segmented by DNAcopy/cbs
GSM225181	GSE10128	GPL5772	18314908	-0.15	0.15	log value from GEO, segmented by DNAcopy/cbs
GSM225182	GSE10128	GPL5772	18314908	-0.15	0.15	log value from GEO, segmented by DNAcopy/cbs
GSM225184	GSE10128	GPL5772	18314908	-0.15	0.15	log value from GEO, segmented by DNAcopy/cbs
GSM225185	GSE10128	GPL5772	18314908	-0.15	0.15	log value from GEO, segmented by DNAcopy/cbs
GSM225186	GSE10128	GPL5772	18314908	-0.15	0.15	log value from GEO, segmented by DNAcopy/cbs
GSM225187	GSE10128	GPL5772	18314908	-0.15	0.15	log value from GEO, segmented by DNAcopy/cbs
GSM225188	GSE10128	GPL5772	18314908	-0.15	0.15	log value from GEO, segmented by DNAcopy/cbs
GSM225189	GSE10128	GPL5772	18314908	-0.15	0.15	log value from GEO, segmented by DNAcopy/cbs
GSM225191	GSE10128	GPL5772	18314908	-0.15	0.15	log value from GEO, segmented by DNAcopy/cbs
GSM225192	GSE10128	GPL5772	18314908	-0.15	0.15	log value from GEO, segmented by DNAcopy/cbs
GSM225194	GSE10128	GPL5772	18314908	-0.15	0.15	log value from GEO, segmented by DNAcopy/cbs
GSM225198	GSE10128	GPL5772	18314908	-0.15	0.15	log value from GEO, segmented by DNAcopy/cbs
GSM225200	GSE10128	GPL5772	18314908	-0.15	0.15	log value from GEO, segmented by DNAcopy/cbs
GSM225202	GSE10128	GPL5772	18314908	-0.15	0.15	log value from GEO, segmented by DNAcopy/cbs
GSM225204	GSE10128	GPL5772	18314908	-0.15	0.15	log value from GEO, segmented by DNAcopy/cbs
GSM225205	GSE10128	GPL5772	18314908	-0.15	0.15	log value from GEO, segmented by DNAcopy/cbs
GSM225208	GSE10128	GPL5772	18314908	-0.15	0.15	log value from GEO, segmented by DNAcopy/cbs
GSM225210	GSE10128	GPL5772	18314908	-0.15	0.15	log value from GEO, segmented by DNAcopy/cbs
GSM225213	GSE10128	GPL5772	18314908	-0.15	0.15	log value from GEO, segmented by DNAcopy/cbs
GSM225216	GSE10128	GPL5772	18314908	-0.15	0.15	log value from GEO, segmented by DNAcopy/cbs
GSM225219	GSE10128	GPL5772	18314908	-0.15	0.15	log value from GEO, segmented by DNAcopy/cbs
GSM225222	GSE10128	GPL5772	18314908	-0.15	0.15	log value from GEO, segmented by DNAcopy/cbs
GSM225518	GSE10128	GPL5772	18314908	-0.15	0.15	log value from GEO, segmented by DNAcopy/cbs
GSM225522	GSE10128	GPL5772	18314908	-0.15	0.15	log value from GEO, segmented by DNAcopy/cbs
GSM225523	GSE10128	GPL5772	18314908	-0.15	0.15	log value from GEO, segmented by DNAcopy/cbs
GSM225524	GSE10128	GPL5772	18314908	-0.15	0.15	log value from GEO, segmented by DNAcopy/cbs
GSM225526	GSE10128	GPL5772	18314908	-0.15	0.15	log value from GEO, segmented by DNAcopy/cbs
GSM225527	GSE10128	GPL5772	18314908	-0.15	0.15	log value from GEO, segmented by DNAcopy/cbs
GSM225528	GSE10128	GPL5772	18314908	-0.15	0.15	log value from GEO, segmented by DNAcopy/cbs
GSM225529	GSE10128	GPL5772	18314908	-0.15	0.15	log value from GEO, segmented by DNAcopy/cbs
GSM225532	GSE10128	GPL5772	18314908	-0.15	0.15	log value from GEO, segmented by DNAcopy/cbs
GSM225533	GSE10128	GPL5772	18314908	-0.15	0.15	log value from GEO, segmented by DNAcopy/cbs
GSM225535	GSE10128	GPL5772	18314908	-0.15	0.15	log value from GEO, segmented by DNAcopy/cbs
GSM225543	GSE10128	GPL5772	18314908	-0.15	0.15	log value from GEO, segmented by DNAcopy/cbs
GSM225546	GSE10128	GPL5772	18314908	-0.15	0.15	log value from GEO, segmented by DNAcopy/cbs
GSM225548	GSE10128	GPL5772	18314908	-0.15	0.15	log value from GEO, segmented by DNAcopy/cbs
GSM225551	GSE10128	GPL5772	18314908	-0.15	0.15	log value from GEO, segmented by DNAcopy/cbs
GSM225554	GSE10128	GPL5772	18314908	-0.15	0.15	log value from GEO, segmented by DNAcopy/cbs
GSM225557	GSE10128	GPL5772	18314908	-0.15	0.15	log value from GEO, segmented by DNAcopy/cbs
GSM225560	GSE10128	GPL5772	18314908	-0.15	0.15	log value from GEO, segmented by DNAcopy/cbs
GSM225562	GSE10128	GPL5772	18314908	-0.15	0.15	log value from GEO, segmented by DNAcopy/cbs
GSM225569	GSE10128	GPL5772	18314908	-0.15	0.15	log value from GEO, segmented by DNAcopy/cbs
GSM225573	GSE10128	GPL5772	18314908	-0.15	0.15	log value from GEO, segmented by DNAcopy/cbs
GSM225576	GSE10128	GPL5772	18314908	-0.15	0.15	log value from GEO, segmented by DNAcopy/cbs
GSM225580	GSE10128	GPL5772	18314908	-0.15	0.15	log value from GEO, segmented by DNAcopy/cbs
GSM225166	GSE10129	GPL5772	18314908	-0.15	0.15	log value from GEO, segmented by DNAcopy/cbs
GSM225167	GSE10129	GPL5772	18314908	-0.15	0.15	log value from GEO, segmented by DNAcopy/cbs
GSM225168	GSE10129	GPL5772	18314908	-0.15	0.15	log value from GEO, segmented by DNAcopy/cbs
GSM225169	GSE10129	GPL5772	18314908	-0.15	0.15	log value from GEO, segmented by DNAcopy/cbs
GSM225171	GSE10129	GPL5772	18314908	-0.15	0.15	log value from GEO, segmented by DNAcopy/cbs
GSM225173	GSE10129	GPL5772	18314908	-0.15	0.15	log value from GEO, segmented by DNAcopy/cbs
GSM225174	GSE10129	GPL5772	18314908	-0.15	0.15	log value from GEO, segmented by DNAcopy/cbs
GSM225175	GSE10129	GPL5772	18314908	-0.15	0.15	log value from GEO, segmented by DNAcopy/cbs
GSM225176	GSE10129	GPL5772	18314908	-0.15	0.15	log value from GEO, segmented by DNAcopy/cbs
GSM225177	GSE10129	GPL5772	18314908	-0.15	0.15	log value from GEO, segmented by DNAcopy/cbs
GSM225178	GSE10129	GPL5772	18314908	-0.15	0.15	log value from GEO, segmented by DNAcopy/cbs
GSM225193	GSE10129	GPL5772	18314908	-0.15	0.15	log value from GEO, segmented by DNAcopy/cbs
GSM225196	GSE10129	GPL5772	18314908	-0.15	0.15	log value from GEO, segmented by DNAcopy/cbs
GSM225201	GSE10129	GPL5772	18314908	-0.15	0.15	log value from GEO, segmented by DNAcopy/cbs
GSM225203	GSE10129	GPL5772	18314908	-0.15	0.15	log value from GEO, segmented by DNAcopy/cbs
GSM225206	GSE10129	GPL5772	18314908	-0.15	0.15	log value from GEO, segmented by DNAcopy/cbs
GSM225209	GSE10129	GPL5772	18314908	-0.15	0.15	log value from GEO, segmented by DNAcopy/cbs
GSM225211	GSE10129	GPL5772	18314908	-0.15	0.15	log value from GEO, segmented by DNAcopy/cbs
GSM225212	GSE10129	GPL5772	18314908	-0.15	0.15	log value from GEO, segmented by DNAcopy/cbs
GSM225214	GSE10129	GPL5772	18314908	-0.15	0.15	log value from GEO, segmented by DNAcopy/cbs
GSM225215	GSE10129	GPL5772	18314908	-0.15	0.15	log value from GEO, segmented by DNAcopy/cbs
GSM225217	GSE10129	GPL5772	18314908	-0.15	0.15	log value from GEO, segmented by DNAcopy/cbs
GSM225220	GSE10129	GPL5772	18314908	-0.15	0.15	log value from GEO, segmented by DNAcopy/cbs
GSM225221	GSE10129	GPL5772	18314908	-0.15	0.15	log value from GEO, segmented by DNAcopy/cbs
GSM225223	GSE10129	GPL5772	18314908	-0.15	0.15	log value from GEO, segmented by DNAcopy/cbs
GSM225224	GSE10129	GPL5772	18314908	-0.15	0.15	log value from GEO, segmented by DNAcopy/cbs
GSM225225	GSE10129	GPL5772	18314908	-0.15	0.15	log value from GEO, segmented by DNAcopy/cbs
GSM225226	GSE10129	GPL5772	18314908	-0.15	0.15	log value from GEO, segmented by DNAcopy/cbs
GSM225227	GSE10129	GPL5772	18314908	-0.15	0.15	log value from GEO, segmented by DNAcopy/cbs
GSM225228	GSE10129	GPL5772	18314908	-0.15	0.15	log value from GEO, segmented by DNAcopy/cbs
GSM225229	GSE10129	GPL5772	18314908	-0.15	0.15	log value from GEO, segmented by DNAcopy/cbs
GSM225230	GSE10129	GPL5772	18314908	-0.15	0.15	log value from GEO, segmented by DNAcopy/cbs
GSM225231	GSE10129	GPL5772	18314908	-0.15	0.15	log value from GEO, segmented by DNAcopy/cbs
GSM225232	GSE10129	GPL5772	18314908	-0.15	0.15	log value from GEO, segmented by DNAcopy/cbs
GSM225822	GSE10129	GPL5772	18314908	-0.15	0.15	log value from GEO, segmented by DNAcopy/cbs
GSM225826	GSE10129	GPL5772	18314908	-0.15	0.15	log value from GEO, segmented by DNAcopy/cbs
GSM225830	GSE10129	GPL5772	18314908	-0.15	0.15	log value from GEO, segmented by DNAcopy/cbs
GSM225834	GSE10129	GPL5772	18314908	-0.15	0.15	log value from GEO, segmented by DNAcopy/cbs
GSM225837	GSE10129	GPL5772	18314908	-0.15	0.15	log value from GEO, segmented by DNAcopy/cbs
GSM225838	GSE10129	GPL5772	18314908	-0.15	0.15	log value from GEO, segmented by DNAcopy/cbs
GSM225839	GSE10129	GPL5772	18314908	-0.15	0.15	log value from GEO, segmented by DNAcopy/cbs
GSM225840	GSE10129	GPL5772	18314908	-0.15	0.15	log value from GEO, segmented by DNAcopy/cbs
GSM225841	GSE10129	GPL5772	18314908	-0.15	0.15	log value from GEO, segmented by DNAcopy/cbs
GSM225842	GSE10129	GPL5772	18314908	-0.15	0.15	log value from GEO, segmented by DNAcopy/cbs
GSM225843	GSE10129	GPL5772	18314908	-0.15	0.15	log value from GEO, segmented by DNAcopy/cbs
GSM225845	GSE10129	GPL5772	18314908	-0.15	0.15	log value from GEO, segmented by DNAcopy/cbs
GSM225847	GSE10129	GPL5772	18314908	-0.15	0.15	log value from GEO, segmented by DNAcopy/cbs
GSM225850	GSE10129	GPL5772	18314908	-0.15	0.15	log value from GEO, segmented by DNAcopy/cbs
GSM225853	GSE10129	GPL5772	18314908	-0.15	0.15	log value from GEO, segmented by DNAcopy/cbs
GSM225856	GSE10129	GPL5772	18314908	-0.15	0.15	log value from GEO, segmented by DNAcopy/cbs
GSM225858	GSE10129	GPL5772	18314908	-0.15	0.15	log value from GEO, segmented by DNAcopy/cbs
GSM225862	GSE10129	GPL5772	18314908	-0.15	0.15	log value from GEO, segmented by DNAcopy/cbs
GSM225865	GSE10129	GPL5772	18314908	-0.15	0.15	log value from GEO, segmented by DNAcopy/cbs
GSM225869	GSE10129	GPL5772	18314908	-0.15	0.15	log value from GEO, segmented by DNAcopy/cbs
GSM225870	GSE10129	GPL5772	18314908	-0.15	0.15	log value from GEO, segmented by DNAcopy/cbs
GSM225872	GSE10129	GPL5772	18314908	-0.15	0.15	log value from GEO, segmented by DNAcopy/cbs
GSM257530	GSE10197	GPL6382	18628458	-0.2	0.2	log value from GEO, segmented by DNAcopy/cbs
GSM257531	GSE10197	GPL6382	18628458	-0.2	0.2	log value from GEO, segmented by DNAcopy/cbs
GSM257532	GSE10197	GPL6382	18628458	-0.2	0.2	log value from GEO, segmented by DNAcopy/cbs
GSM257533	GSE10197	GPL6382	18628458	-0.2	0.2	log value from GEO, segmented by DNAcopy/cbs
GSM257534	GSE10197	GPL6382	18628458	-0.2	0.2	log value from GEO, segmented by DNAcopy/cbs
GSM257535	GSE10197	GPL6382	18628458	-0.2	0.2	log value from GEO, segmented by DNAcopy/cbs
GSM257536	GSE10197	GPL6382	18628458	-0.2	0.2	log value from GEO, segmented by DNAcopy/cbs
GSM257537	GSE10197	GPL6382	18628458	-0.2	0.2	log value from GEO, segmented by DNAcopy/cbs
GSM257538	GSE10197	GPL6382	18628458	-0.2	0.2	log value from GEO, segmented by DNAcopy/cbs
GSM257539	GSE10197	GPL6382	18628458	-0.2	0.2	log value from GEO, segmented by DNAcopy/cbs
GSM257540	GSE10197	GPL6382	18628458	-0.2	0.2	log value from GEO, segmented by DNAcopy/cbs
GSM257541	GSE10197	GPL6382	18628458	-0.2	0.2	log value from GEO, segmented by DNAcopy/cbs
GSM257542	GSE10197	GPL6382	18628458	-0.2	0.2	log value from GEO, segmented by DNAcopy/cbs
GSM257543	GSE10197	GPL6382	18628458	-0.2	0.2	log value from GEO, segmented by DNAcopy/cbs
GSM257544	GSE10197	GPL6382	18628458	-0.2	0.2	log value from GEO, segmented by DNAcopy/cbs
GSM257545	GSE10197	GPL6382	18628458	-0.2	0.2	log value from GEO, segmented by DNAcopy/cbs
GSM257546	GSE10197	GPL6382	18628458	-0.2	0.2	log value from GEO, segmented by DNAcopy/cbs
GSM257547	GSE10197	GPL6382	18628458	-0.2	0.2	log value from GEO, segmented by DNAcopy/cbs
GSM257548	GSE10197	GPL6382	18628458	-0.2	0.2	log value from GEO, segmented by DNAcopy/cbs
GSM257549	GSE10197	GPL6382	18628458	-0.2	0.2	log value from GEO, segmented by DNAcopy/cbs
GSM257550	GSE10197	GPL6382	18628458	-0.2	0.2	log value from GEO, segmented by DNAcopy/cbs
GSM257551	GSE10197	GPL6382	18628458	-0.2	0.2	log value from GEO, segmented by DNAcopy/cbs
GSM257552	GSE10197	GPL6382	18628458	-0.2	0.2	log value from GEO, segmented by DNAcopy/cbs
GSM257553	GSE10197	GPL6382	18628458	-0.2	0.2	log value from GEO, segmented by DNAcopy/cbs
GSM257554	GSE10197	GPL6382	18628458	-0.2	0.2	log value from GEO, segmented by DNAcopy/cbs
GSM257555	GSE10197	GPL6382	18628458	-0.2	0.2	log value from GEO, segmented by DNAcopy/cbs
GSM257556	GSE10197	GPL6382	18628458	-0.2	0.2	log value from GEO, segmented by DNAcopy/cbs
GSM257557	GSE10197	GPL6382	18628458	-0.2	0.2	log value from GEO, segmented by DNAcopy/cbs
GSM257558	GSE10197	GPL6382	18628458	-0.2	0.2	log value from GEO, segmented by DNAcopy/cbs
GSM257559	GSE10197	GPL6382	18628458	-0.2	0.2	log value from GEO, segmented by DNAcopy/cbs
GSM257560	GSE10197	GPL6382	18628458	-0.2	0.2	log value from GEO, segmented by DNAcopy/cbs
GSM257561	GSE10197	GPL6382	18628458	-0.2	0.2	log value from GEO, segmented by DNAcopy/cbs
GSM257562	GSE10197	GPL6382	18628458	-0.2	0.2	log value from GEO, segmented by DNAcopy/cbs
GSM257563	GSE10197	GPL6382	18628458	-0.2	0.2	log value from GEO, segmented by DNAcopy/cbs
GSM257564	GSE10197	GPL6382	18628458	-0.2	0.2	log value from GEO, segmented by DNAcopy/cbs
GSM257565	GSE10197	GPL6382	18628458	-0.2	0.2	log value from GEO, segmented by DNAcopy/cbs
GSM257566	GSE10197	GPL6382	18628458	-0.2	0.2	log value from GEO, segmented by DNAcopy/cbs
GSM257567	GSE10197	GPL6382	18628458	-0.2	0.2	log value from GEO, segmented by DNAcopy/cbs
GSM259245	GSE10266	GPL5840	18604193	-0.15	0.15	log value from GEO, segmented by DNAcopy/cbs
GSM259246	GSE10266	GPL5840	18604193	-0.15	0.15	log value from GEO, segmented by DNAcopy/cbs
GSM259247	GSE10266	GPL5840	18604193	-0.15	0.15	log value from GEO, segmented by DNAcopy/cbs
GSM259248	GSE10266	GPL5840	18604193	-0.15	0.15	log value from GEO, segmented by DNAcopy/cbs
GSM259249	GSE10266	GPL5840	18604193	-0.15	0.15	log value from GEO, segmented by DNAcopy/cbs
GSM264659	GSE10456	GPL6478		-0.15	0.15	log value from GEO, segmented by DNAcopy/cbs
GSM264660	GSE10456	GPL6478		-0.15	0.15	log value from GEO, segmented by DNAcopy/cbs
GSM264661	GSE10456	GPL6478		-0.15	0.15	log value from GEO, segmented by DNAcopy/cbs
GSM264662	GSE10456	GPL6478		-0.15	0.15	log value from GEO, segmented by DNAcopy/cbs
GSM264663	GSE10456	GPL6478		-0.15	0.15	log value from GEO, segmented by DNAcopy/cbs
GSM264664	GSE10456	GPL6478		-0.15	0.15	log value from GEO, segmented by DNAcopy/cbs
GSM264665	GSE10456	GPL6478		-0.15	0.15	log value from GEO, segmented by DNAcopy/cbs
GSM264666	GSE10456	GPL6478		-0.15	0.15	log value from GEO, segmented by DNAcopy/cbs
GSM264667	GSE10456	GPL6478		-0.15	0.15	log value from GEO, segmented by DNAcopy/cbs
GSM264668	GSE10456	GPL6478		-0.15	0.15	log value from GEO, segmented by DNAcopy/cbs
GSM264669	GSE10456	GPL6478		-0.15	0.15	log value from GEO, segmented by DNAcopy/cbs
GSM264670	GSE10456	GPL6478		-0.15	0.15	log value from GEO, segmented by DNAcopy/cbs
GSM264671	GSE10456	GPL6478		-0.15	0.15	log value from GEO, segmented by DNAcopy/cbs
GSM264672	GSE10456	GPL6478		-0.15	0.15	log value from GEO, segmented by DNAcopy/cbs
GSM264673	GSE10456	GPL6478		-0.15	0.15	log value from GEO, segmented by DNAcopy/cbs
GSM265500	GSE10506	GPL5711	18519675	-0.15	0.15	log value from GEO, segmented by DNAcopy/cbs
GSM265501	GSE10506	GPL5711	18519675	-0.15	0.15	log value from GEO, segmented by DNAcopy/cbs
GSM265786	GSE10506	GPL5711	18519675	-0.15	0.15	log value from GEO, segmented by DNAcopy/cbs
GSM265787	GSE10506	GPL5711	18519675	-0.15	0.15	log value from GEO, segmented by DNAcopy/cbs
GSM265788	GSE10506	GPL5711	18519675	-0.15	0.15	log value from GEO, segmented by DNAcopy/cbs
GSM265789	GSE10506	GPL5711	18519675	-0.15	0.15	log value from GEO, segmented by DNAcopy/cbs
GSM265790	GSE10506	GPL5711	18519675	-0.15	0.15	log value from GEO, segmented by DNAcopy/cbs
GSM265791	GSE10506	GPL5711	18519675	-0.15	0.15	log value from GEO, segmented by DNAcopy/cbs
GSM265808	GSE10506	GPL5711	18519675	-0.15	0.15	log value from GEO, segmented by DNAcopy/cbs
GSM265809	GSE10506	GPL5711	18519675	-0.15	0.15	log value from GEO, segmented by DNAcopy/cbs
GSM266074	GSE10506	GPL5711	18519675	-0.15	0.15	log value from GEO, segmented by DNAcopy/cbs
GSM266075	GSE10506	GPL5711	18519675	-0.15	0.15	log value from GEO, segmented by DNAcopy/cbs
GSM266078	GSE10506	GPL5711	18519675	-0.15	0.15	log value from GEO, segmented by DNAcopy/cbs
GSM266119	GSE10506	GPL5711	18519675	-0.15	0.15	log value from GEO, segmented by DNAcopy/cbs
GSM266586	GSE10506	GPL5711	18519675	-0.15	0.15	log value from GEO, segmented by DNAcopy/cbs
GSM266659	GSE10506	GPL5711	18519675	-0.15	0.15	log value from GEO, segmented by DNAcopy/cbs
GSM266660	GSE10506	GPL5711	18519675	-0.15	0.15	log value from GEO, segmented by DNAcopy/cbs
GSM266661	GSE10506	GPL5711	18519675	-0.15	0.15	log value from GEO, segmented by DNAcopy/cbs
GSM266703	GSE10506	GPL5711	18519675	-0.15	0.15	log value from GEO, segmented by DNAcopy/cbs
GSM266705	GSE10506	GPL5711	18519675	-0.15	0.15	log value from GEO, segmented by DNAcopy/cbs
GSM266706	GSE10506	GPL5711	18519675	-0.15	0.15	log value from GEO, segmented by DNAcopy/cbs
GSM266707	GSE10506	GPL5711	18519675	-0.15	0.15	log value from GEO, segmented by DNAcopy/cbs
GSM266708	GSE10506	GPL5711	18519675	-0.15	0.15	log value from GEO, segmented by DNAcopy/cbs
GSM266715	GSE10506	GPL5711	18519675	-0.15	0.15	log value from GEO, segmented by DNAcopy/cbs
GSM265917	GSE10524	GPL4012	18729069	-0.15	0.15	log value from GEO, segmented by DNAcopy/cbs
GSM265918	GSE10524	GPL4012	18729069	-0.15	0.15	log value from GEO, segmented by DNAcopy/cbs
GSM265919	GSE10524	GPL4012	18729069	-0.15	0.15	log value from GEO, segmented by DNAcopy/cbs
GSM265920	GSE10524	GPL4012	18729069	-0.15	0.15	log value from GEO, segmented by DNAcopy/cbs
GSM265921	GSE10524	GPL4012	18729069	-0.15	0.15	log value from GEO, segmented by DNAcopy/cbs
GSM265922	GSE10524	GPL4012	18729069	-0.15	0.15	log value from GEO, segmented by DNAcopy/cbs
GSM265923	GSE10524	GPL4012	18729069	-0.15	0.15	log value from GEO, segmented by DNAcopy/cbs
GSM265924	GSE10524	GPL4012	18729069	-0.15	0.15	log value from GEO, segmented by DNAcopy/cbs
GSM265925	GSE10524	GPL4012	18729069	-0.15	0.15	log value from GEO, segmented by DNAcopy/cbs
GSM265926	GSE10524	GPL4012	18729069	-0.15	0.15	log value from GEO, segmented by DNAcopy/cbs
GSM265927	GSE10524	GPL4012	18729069	-0.15	0.15	log value from GEO, segmented by DNAcopy/cbs
GSM265928	GSE10524	GPL4012	18729069	-0.15	0.15	log value from GEO, segmented by DNAcopy/cbs
GSM265929	GSE10524	GPL4012	18729069	-0.15	0.15	log value from GEO, segmented by DNAcopy/cbs
GSM265930	GSE10524	GPL4012	18729069	-0.15	0.15	log value from GEO, segmented by DNAcopy/cbs
GSM265931	GSE10524	GPL4012	18729069	-0.15	0.15	log value from GEO, segmented by DNAcopy/cbs
GSM265932	GSE10524	GPL4012	18729069	-0.15	0.15	log value from GEO, segmented by DNAcopy/cbs
GSM265933	GSE10524	GPL4012	18729069	-0.15	0.15	log value from GEO, segmented by DNAcopy/cbs
GSM265934	GSE10524	GPL4012	18729069	-0.15	0.15	log value from GEO, segmented by DNAcopy/cbs
GSM265935	GSE10524	GPL4012	18729069	-0.15	0.15	log value from GEO, segmented by DNAcopy/cbs
GSM265936	GSE10524	GPL4012	18729069	-0.15	0.15	log value from GEO, segmented by DNAcopy/cbs
GSM265937	GSE10524	GPL4012	18729069	-0.15	0.15	log value from GEO, segmented by DNAcopy/cbs
GSM265938	GSE10524	GPL4012	18729069	-0.15	0.15	log value from GEO, segmented by DNAcopy/cbs
GSM265939	GSE10524	GPL4012	18729069	-0.15	0.15	log value from GEO, segmented by DNAcopy/cbs
GSM265940	GSE10524	GPL4012	18729069	-0.15	0.15	log value from GEO, segmented by DNAcopy/cbs
GSM265941	GSE10524	GPL4012	18729069	-0.15	0.15	log value from GEO, segmented by DNAcopy/cbs
GSM265942	GSE10524	GPL4012	18729069	-0.15	0.15	log value from GEO, segmented by DNAcopy/cbs
GSM265943	GSE10524	GPL4012	18729069	-0.15	0.15	log value from GEO, segmented by DNAcopy/cbs
GSM265944	GSE10524	GPL4012	18729069	-0.15	0.15	log value from GEO, segmented by DNAcopy/cbs
GSM265945	GSE10524	GPL4012	18729069	-0.15	0.15	log value from GEO, segmented by DNAcopy/cbs
GSM265946	GSE10524	GPL4012	18729069	-0.15	0.15	log value from GEO, segmented by DNAcopy/cbs
GSM265947	GSE10524	GPL4012	18729069	-0.15	0.15	log value from GEO, segmented by DNAcopy/cbs
GSM265948	GSE10524	GPL4012	18729069	-0.15	0.15	log value from GEO, segmented by DNAcopy/cbs
GSM265949	GSE10524	GPL4012	18729069	-0.15	0.15	log value from GEO, segmented by DNAcopy/cbs
GSM265950	GSE10524	GPL4012	18729069	-0.15	0.15	log value from GEO, segmented by DNAcopy/cbs
GSM265951	GSE10524	GPL4012	18729069	-0.15	0.15	log value from GEO, segmented by DNAcopy/cbs
GSM265952	GSE10524	GPL4012	18729069	-0.15	0.15	log value from GEO, segmented by DNAcopy/cbs
GSM265953	GSE10524	GPL4012	18729069	-0.15	0.15	log value from GEO, segmented by DNAcopy/cbs
GSM265954	GSE10524	GPL4012	18729069	-0.15	0.15	log value from GEO, segmented by DNAcopy/cbs
GSM265955	GSE10524	GPL4012	18729069	-0.15	0.15	log value from GEO, segmented by DNAcopy/cbs
GSM265956	GSE10524	GPL4012	18729069	-0.15	0.15	log value from GEO, segmented by DNAcopy/cbs
GSM267194	GSE10600	GPL6514	19760610	-0.083	0.086	log value from GEO, segmented by DNAcopy/cbs
GSM267195	GSE10600	GPL6514	19760610	-0.083	0.086	log value from GEO, segmented by DNAcopy/cbs
GSM267196	GSE10600	GPL6514	19760610	-0.083	0.086	log value from GEO, segmented by DNAcopy/cbs
GSM267197	GSE10600	GPL6514	19760610	-0.083	0.086	log value from GEO, segmented by DNAcopy/cbs
GSM267198	GSE10600	GPL6514	19760610	-0.083	0.086	log value from GEO, segmented by DNAcopy/cbs
GSM267199	GSE10600	GPL6514	19760610	-0.083	0.086	log value from GEO, segmented by DNAcopy/cbs
GSM267200	GSE10600	GPL6514	19760610	-0.083	0.086	log value from GEO, segmented by DNAcopy/cbs
GSM267201	GSE10600	GPL6514	19760610	-0.083	0.086	log value from GEO, segmented by DNAcopy/cbs
GSM267202	GSE10600	GPL6514	19760610	-0.083	0.086	log value from GEO, segmented by DNAcopy/cbs
GSM267203	GSE10600	GPL6514	19760610	-0.083	0.086	log value from GEO, segmented by DNAcopy/cbs
GSM267204	GSE10600	GPL6514	19760610	-0.083	0.086	log value from GEO, segmented by DNAcopy/cbs
GSM267205	GSE10600	GPL6514	19760610	-0.083	0.086	log value from GEO, segmented by DNAcopy/cbs
GSM267206	GSE10600	GPL6514	19760610	-0.083	0.086	log value from GEO, segmented by DNAcopy/cbs
GSM267207	GSE10600	GPL6514	19760610	-0.083	0.086	log value from GEO, segmented by DNAcopy/cbs
GSM267208	GSE10600	GPL6514	19760610	-0.083	0.086	log value from GEO, segmented by DNAcopy/cbs
GSM267209	GSE10600	GPL6514	19760610	-0.083	0.086	log value from GEO, segmented by DNAcopy/cbs
GSM267210	GSE10600	GPL6514	19760610	-0.083	0.086	log value from GEO, segmented by DNAcopy/cbs
GSM267211	GSE10600	GPL6514	19760610	-0.083	0.086	log value from GEO, segmented by DNAcopy/cbs
GSM267212	GSE10600	GPL6514	19760610	-0.083	0.086	log value from GEO, segmented by DNAcopy/cbs
GSM267213	GSE10600	GPL6514	19760610	-0.083	0.086	log value from GEO, segmented by DNAcopy/cbs
GSM267214	GSE10600	GPL6514	19760610	-0.083	0.086	log value from GEO, segmented by DNAcopy/cbs
GSM267215	GSE10600	GPL6514	19760610	-0.083	0.086	log value from GEO, segmented by DNAcopy/cbs
GSM267216	GSE10600	GPL6514	19760610	-0.083	0.086	log value from GEO, segmented by DNAcopy/cbs
GSM267217	GSE10600	GPL6514	19760610	-0.083	0.086	log value from GEO, segmented by DNAcopy/cbs
GSM267218	GSE10600	GPL6514	19760610	-0.083	0.086	log value from GEO, segmented by DNAcopy/cbs
GSM267219	GSE10600	GPL6514	19760610	-0.083	0.086	log value from GEO, segmented by DNAcopy/cbs
GSM267220	GSE10600	GPL6514	19760610	-0.083	0.086	log value from GEO, segmented by DNAcopy/cbs
GSM267221	GSE10600	GPL6514	19760610	-0.083	0.086	log value from GEO, segmented by DNAcopy/cbs
GSM267222	GSE10600	GPL6514	19760610	-0.083	0.086	log value from GEO, segmented by DNAcopy/cbs
GSM267431	GSE10611	GPL6520	18559507	-0.15	0.15	log value from GEO, segmented by DNAcopy/cbs
GSM267432	GSE10611	GPL6520	18559507	-0.15	0.15	log value from GEO, segmented by DNAcopy/cbs
GSM267433	GSE10611	GPL6520	18559507	-0.15	0.15	log value from GEO, segmented by DNAcopy/cbs
GSM267434	GSE10611	GPL6520	18559507	-0.15	0.15	log value from GEO, segmented by DNAcopy/cbs
GSM267435	GSE10611	GPL6520	18559507	-0.15	0.15	log value from GEO, segmented by DNAcopy/cbs
GSM267436	GSE10611	GPL6520	18559507	-0.15	0.15	log value from GEO, segmented by DNAcopy/cbs
GSM267437	GSE10611	GPL6520	18559507	-0.15	0.15	log value from GEO, segmented by DNAcopy/cbs
GSM267438	GSE10611	GPL6521	18559507	-0.15	0.15	log value from GEO, segmented by DNAcopy/cbs
GSM267439	GSE10611	GPL6521	18559507	-0.15	0.15	log value from GEO, segmented by DNAcopy/cbs
GSM267440	GSE10611	GPL6521	18559507	-0.15	0.15	log value from GEO, segmented by DNAcopy/cbs
GSM267441	GSE10611	GPL6521	18559507	-0.15	0.15	log value from GEO, segmented by DNAcopy/cbs
GSM267442	GSE10611	GPL6521	18559507	-0.15	0.15	log value from GEO, segmented by DNAcopy/cbs
GSM267443	GSE10611	GPL6521	18559507	-0.15	0.15	log value from GEO, segmented by DNAcopy/cbs
GSM267444	GSE10611	GPL6521	18559507	-0.15	0.15	log value from GEO, segmented by DNAcopy/cbs
GSM273213	GSE10822	GPL6575	19151777	-0.15	0.15	log value from GEO, segmented by DNAcopy/cbs
GSM273214	GSE10822	GPL6575	19151777	-0.15	0.15	log value from GEO, segmented by DNAcopy/cbs
GSM273215	GSE10822	GPL6575	19151777	-0.15	0.15	log value from GEO, segmented by DNAcopy/cbs
GSM273216	GSE10822	GPL6575	19151777	-0.15	0.15	log value from GEO, segmented by DNAcopy/cbs
GSM273217	GSE10822	GPL6575	19151777	-0.15	0.15	log value from GEO, segmented by DNAcopy/cbs
GSM273218	GSE10822	GPL6575	19151777	-0.15	0.15	log value from GEO, segmented by DNAcopy/cbs
GSM273219	GSE10822	GPL6575	19151777	-0.15	0.15	log value from GEO, segmented by DNAcopy/cbs
GSM273220	GSE10822	GPL6575	19151777	-0.15	0.15	log value from GEO, segmented by DNAcopy/cbs
GSM273222	GSE10822	GPL6575	19151777	-0.15	0.15	log value from GEO, segmented by DNAcopy/cbs
GSM273223	GSE10822	GPL6575	19151777	-0.15	0.15	log value from GEO, segmented by DNAcopy/cbs
GSM273224	GSE10822	GPL6575	19151777	-0.15	0.15	log value from GEO, segmented by DNAcopy/cbs
GSM273225	GSE10822	GPL6575	19151777	-0.15	0.15	log value from GEO, segmented by DNAcopy/cbs
GSM273226	GSE10822	GPL6575	19151777	-0.15	0.15	log value from GEO, segmented by DNAcopy/cbs
GSM275604	GSE10878	GPL2879	18828157	-0.15	0.15	log value from GEO, segmented by DNAcopy/cbs
GSM275605	GSE10878	GPL2879	18828157	-0.15	0.15	log value from GEO, segmented by DNAcopy/cbs
GSM275606	GSE10878	GPL2879	18828157	-0.15	0.15	log value from GEO, segmented by DNAcopy/cbs
GSM275607	GSE10878	GPL2879	18828157	-0.15	0.15	log value from GEO, segmented by DNAcopy/cbs
GSM275608	GSE10878	GPL2879	18828157	-0.15	0.15	log value from GEO, segmented by DNAcopy/cbs
GSM275609	GSE10878	GPL2879	18828157	-0.15	0.15	log value from GEO, segmented by DNAcopy/cbs
GSM275610	GSE10878	GPL2879	18828157	-0.15	0.15	log value from GEO, segmented by DNAcopy/cbs
GSM275611	GSE10878	GPL2879	18828157	-0.15	0.15	log value from GEO, segmented by DNAcopy/cbs
GSM275612	GSE10878	GPL2879	18828157	-0.15	0.15	log value from GEO, segmented by DNAcopy/cbs
GSM275613	GSE10878	GPL2879	18828157	-0.15	0.15	log value from GEO, segmented by DNAcopy/cbs
GSM275614	GSE10878	GPL2879	18828157	-0.15	0.15	log value from GEO, segmented by DNAcopy/cbs
GSM275615	GSE10878	GPL2879	18828157	-0.15	0.15	log value from GEO, segmented by DNAcopy/cbs
GSM275616	GSE10878	GPL2879	18828157	-0.15	0.15	log value from GEO, segmented by DNAcopy/cbs
GSM275617	GSE10878	GPL2879	18828157	-0.15	0.15	log value from GEO, segmented by DNAcopy/cbs
GSM275618	GSE10878	GPL2879	18828157	-0.15	0.15	log value from GEO, segmented by DNAcopy/cbs
GSM275619	GSE10878	GPL2879	18828157	-0.15	0.15	log value from GEO, segmented by DNAcopy/cbs
GSM275620	GSE10878	GPL2879	18828157	-0.15	0.15	log value from GEO, segmented by DNAcopy/cbs
GSM275621	GSE10878	GPL2879	18828157	-0.15	0.15	log value from GEO, segmented by DNAcopy/cbs
GSM275622	GSE10878	GPL2879	18828157	-0.15	0.15	log value from GEO, segmented by DNAcopy/cbs
GSM275623	GSE10878	GPL2879	18828157	-0.15	0.15	log value from GEO, segmented by DNAcopy/cbs
GSM275624	GSE10878	GPL2879	18828157	-0.15	0.15	log value from GEO, segmented by DNAcopy/cbs
GSM275625	GSE10878	GPL2879	18828157	-0.15	0.15	log value from GEO, segmented by DNAcopy/cbs
GSM275626	GSE10878	GPL2879	18828157	-0.15	0.15	log value from GEO, segmented by DNAcopy/cbs
GSM275627	GSE10878	GPL2879	18828157	-0.15	0.15	log value from GEO, segmented by DNAcopy/cbs
GSM275628	GSE10878	GPL2879	18828157	-0.15	0.15	log value from GEO, segmented by DNAcopy/cbs
GSM275629	GSE10878	GPL2879	18828157	-0.15	0.15	log value from GEO, segmented by DNAcopy/cbs
GSM275630	GSE10878	GPL2879	18828157	-0.15	0.15	log value from GEO, segmented by DNAcopy/cbs
GSM275631	GSE10878	GPL2879	18828157	-0.15	0.15	log value from GEO, segmented by DNAcopy/cbs
GSM275632	GSE10878	GPL2879	18828157	-0.15	0.15	log value from GEO, segmented by DNAcopy/cbs
GSM275633	GSE10878	GPL2879	18828157	-0.15	0.15	log value from GEO, segmented by DNAcopy/cbs
GSM275634	GSE10878	GPL2879	18828157	-0.15	0.15	log value from GEO, segmented by DNAcopy/cbs
GSM275635	GSE10878	GPL2879	18828157	-0.15	0.15	log value from GEO, segmented by DNAcopy/cbs
GSM275636	GSE10878	GPL2879	18828157	-0.15	0.15	log value from GEO, segmented by DNAcopy/cbs
GSM275640	GSE10878	GPL2879	18828157	-0.15	0.15	log value from GEO, segmented by DNAcopy/cbs
GSM275644	GSE10878	GPL2879	18828157	-0.15	0.15	log value from GEO, segmented by DNAcopy/cbs
GSM275645	GSE10878	GPL2879	18828157	-0.15	0.15	log value from GEO, segmented by DNAcopy/cbs
GSM275646	GSE10878	GPL2879	18828157	-0.15	0.15	log value from GEO, segmented by DNAcopy/cbs
GSM280445	GSE11109	GPL2879		-0.15	0.15	log value from GEO, segmented by DNAcopy/cbs
GSM280446	GSE11109	GPL2879		-0.15	0.15	log value from GEO, segmented by DNAcopy/cbs
GSM280447	GSE11109	GPL2879		-0.15	0.15	log value from GEO, segmented by DNAcopy/cbs
GSM280448	GSE11109	GPL2879		-0.15	0.15	log value from GEO, segmented by DNAcopy/cbs
GSM280449	GSE11109	GPL2879		-0.15	0.15	log value from GEO, segmented by DNAcopy/cbs
GSM280450	GSE11109	GPL2879		-0.15	0.15	log value from GEO, segmented by DNAcopy/cbs
GSM280451	GSE11109	GPL2879		-0.15	0.15	log value from GEO, segmented by DNAcopy/cbs
GSM280452	GSE11109	GPL2879		-0.15	0.15	log value from GEO, segmented by DNAcopy/cbs
GSM280453	GSE11109	GPL2879		-0.15	0.15	log value from GEO, segmented by DNAcopy/cbs
GSM280454	GSE11109	GPL2879		-0.15	0.15	log value from GEO, segmented by DNAcopy/cbs
GSM280455	GSE11109	GPL2879		-0.15	0.15	log value from GEO, segmented by DNAcopy/cbs
GSM280456	GSE11109	GPL2879		-0.15	0.15	log value from GEO, segmented by DNAcopy/cbs
GSM280457	GSE11109	GPL2879		-0.15	0.15	log value from GEO, segmented by DNAcopy/cbs
GSM280458	GSE11109	GPL2879		-0.15	0.15	log value from GEO, segmented by DNAcopy/cbs
GSM280459	GSE11109	GPL2879		-0.15	0.15	log value from GEO, segmented by DNAcopy/cbs
GSM280460	GSE11109	GPL2879		-0.15	0.15	log value from GEO, segmented by DNAcopy/cbs
GSM280461	GSE11109	GPL2879		-0.15	0.15	log value from GEO, segmented by DNAcopy/cbs
GSM280462	GSE11109	GPL2879		-0.15	0.15	log value from GEO, segmented by DNAcopy/cbs
GSM280463	GSE11109	GPL2879		-0.15	0.15	log value from GEO, segmented by DNAcopy/cbs
GSM280464	GSE11109	GPL2879		-0.15	0.15	log value from GEO, segmented by DNAcopy/cbs
GSM281443	GSE11155	GPL6737	18632612	-0.15	0.15	log value from GEO, segmented by DNAcopy/cbs
GSM281444	GSE11155	GPL6737	18632612	-0.15	0.15	log value from GEO, segmented by DNAcopy/cbs
GSM281445	GSE11155	GPL6737	18632612	-0.15	0.15	log value from GEO, segmented by DNAcopy/cbs
GSM281446	GSE11155	GPL6737	18632612	-0.15	0.15	log value from GEO, segmented by DNAcopy/cbs
GSM281447	GSE11155	GPL6737	18632612	-0.15	0.15	log value from GEO, segmented by DNAcopy/cbs
GSM281448	GSE11155	GPL6737	18632612	-0.15	0.15	log value from GEO, segmented by DNAcopy/cbs
GSM281449	GSE11155	GPL6737	18632612	-0.15	0.15	log value from GEO, segmented by DNAcopy/cbs
GSM281450	GSE11155	GPL6737	18632612	-0.15	0.15	log value from GEO, segmented by DNAcopy/cbs
GSM281451	GSE11155	GPL6737	18632612	-0.15	0.15	log value from GEO, segmented by DNAcopy/cbs
GSM281452	GSE11155	GPL6737	18632612	-0.15	0.15	log value from GEO, segmented by DNAcopy/cbs
GSM281453	GSE11155	GPL6737	18632612	-0.15	0.15	log value from GEO, segmented by DNAcopy/cbs
GSM281454	GSE11155	GPL6737	18632612	-0.15	0.15	log value from GEO, segmented by DNAcopy/cbs
GSM281455	GSE11155	GPL6737	18632612	-0.15	0.15	log value from GEO, segmented by DNAcopy/cbs
GSM281456	GSE11155	GPL6737	18632612	-0.15	0.15	log value from GEO, segmented by DNAcopy/cbs
GSM281457	GSE11155	GPL6737	18632612	-0.15	0.15	log value from GEO, segmented by DNAcopy/cbs
GSM281458	GSE11155	GPL6737	18632612	-0.15	0.15	log value from GEO, segmented by DNAcopy/cbs
GSM281459	GSE11155	GPL6737	18632612	-0.15	0.15	log value from GEO, segmented by DNAcopy/cbs
GSM281460	GSE11155	GPL6737	18632612	-0.15	0.15	log value from GEO, segmented by DNAcopy/cbs
GSM281461	GSE11155	GPL6737	18632612	-0.15	0.15	log value from GEO, segmented by DNAcopy/cbs
GSM281462	GSE11155	GPL6737	18632612	-0.15	0.15	log value from GEO, segmented by DNAcopy/cbs
GSM281463	GSE11155	GPL6737	18632612	-0.15	0.15	log value from GEO, segmented by DNAcopy/cbs
GSM281464	GSE11155	GPL6737	18632612	-0.15	0.15	log value from GEO, segmented by DNAcopy/cbs
GSM281465	GSE11155	GPL6737	18632612	-0.15	0.15	log value from GEO, segmented by DNAcopy/cbs
GSM281466	GSE11155	GPL6737	18632612	-0.15	0.15	log value from GEO, segmented by DNAcopy/cbs
GSM281467	GSE11155	GPL6737	18632612	-0.15	0.15	log value from GEO, segmented by DNAcopy/cbs
GSM281468	GSE11155	GPL6737	18632612	-0.15	0.15	log value from GEO, segmented by DNAcopy/cbs
GSM281469	GSE11155	GPL6737	18632612	-0.15	0.15	log value from GEO, segmented by DNAcopy/cbs
GSM281470	GSE11155	GPL6737	18632612	-0.15	0.15	log value from GEO, segmented by DNAcopy/cbs
GSM281471	GSE11155	GPL6737	18632612	-0.15	0.15	log value from GEO, segmented by DNAcopy/cbs
GSM281472	GSE11155	GPL6737	18632612	-0.15	0.15	log value from GEO, segmented by DNAcopy/cbs
GSM281473	GSE11155	GPL6737	18632612	-0.15	0.15	log value from GEO, segmented by DNAcopy/cbs
GSM281474	GSE11155	GPL6737	18632612	-0.15	0.15	log value from GEO, segmented by DNAcopy/cbs
GSM281475	GSE11155	GPL6737	18632612	-0.15	0.15	log value from GEO, segmented by DNAcopy/cbs
GSM281476	GSE11155	GPL6737	18632612	-0.15	0.15	log value from GEO, segmented by DNAcopy/cbs
GSM281477	GSE11155	GPL6737	18632612	-0.15	0.15	log value from GEO, segmented by DNAcopy/cbs
GSM281478	GSE11155	GPL6737	18632612	-0.15	0.15	log value from GEO, segmented by DNAcopy/cbs
GSM281479	GSE11155	GPL6737	18632612	-0.15	0.15	log value from GEO, segmented by DNAcopy/cbs
GSM281480	GSE11155	GPL6737	18632612	-0.15	0.15	log value from GEO, segmented by DNAcopy/cbs
GSM281481	GSE11155	GPL6737	18632612	-0.15	0.15	log value from GEO, segmented by DNAcopy/cbs
GSM281482	GSE11155	GPL6737	18632612	-0.15	0.15	log value from GEO, segmented by DNAcopy/cbs
GSM281483	GSE11155	GPL6737	18632612	-0.15	0.15	log value from GEO, segmented by DNAcopy/cbs
GSM281484	GSE11155	GPL6737	18632612	-0.15	0.15	log value from GEO, segmented by DNAcopy/cbs
GSM281485	GSE11155	GPL6737	18632612	-0.15	0.15	log value from GEO, segmented by DNAcopy/cbs
GSM281486	GSE11155	GPL6737	18632612	-0.15	0.15	log value from GEO, segmented by DNAcopy/cbs
GSM281487	GSE11155	GPL6737	18632612	-0.15	0.15	log value from GEO, segmented by DNAcopy/cbs
GSM281488	GSE11155	GPL6737	18632612	-0.15	0.15	log value from GEO, segmented by DNAcopy/cbs
GSM281489	GSE11155	GPL6737	18632612	-0.15	0.15	log value from GEO, segmented by DNAcopy/cbs
GSM281490	GSE11155	GPL6737	18632612	-0.15	0.15	log value from GEO, segmented by DNAcopy/cbs
GSM281492	GSE11155	GPL6737	18632612	-0.15	0.15	log value from GEO, segmented by DNAcopy/cbs
GSM281493	GSE11155	GPL6737	18632612	-0.15	0.15	log value from GEO, segmented by DNAcopy/cbs
GSM281494	GSE11155	GPL6737	18632612	-0.15	0.15	log value from GEO, segmented by DNAcopy/cbs
GSM281495	GSE11155	GPL6737	18632612	-0.15	0.15	log value from GEO, segmented by DNAcopy/cbs
GSM281496	GSE11155	GPL6737	18632612	-0.15	0.15	log value from GEO, segmented by DNAcopy/cbs
GSM281497	GSE11155	GPL6737	18632612	-0.15	0.15	log value from GEO, segmented by DNAcopy/cbs
GSM281498	GSE11155	GPL6737	18632612	-0.15	0.15	log value from GEO, segmented by DNAcopy/cbs
GSM281499	GSE11155	GPL6737	18632612	-0.15	0.15	log value from GEO, segmented by DNAcopy/cbs
GSM281500	GSE11155	GPL6737	18632612	-0.15	0.15	log value from GEO, segmented by DNAcopy/cbs
GSM281501	GSE11155	GPL6737	18632612	-0.15	0.15	log value from GEO, segmented by DNAcopy/cbs
GSM281502	GSE11155	GPL6737	18632612	-0.15	0.15	log value from GEO, segmented by DNAcopy/cbs
GSM281503	GSE11155	GPL6737	18632612	-0.15	0.15	log value from GEO, segmented by DNAcopy/cbs
GSM281504	GSE11155	GPL6737	18632612	-0.15	0.15	log value from GEO, segmented by DNAcopy/cbs
GSM281506	GSE11155	GPL6737	18632612	-0.15	0.15	log value from GEO, segmented by DNAcopy/cbs
GSM281507	GSE11155	GPL6737	18632612	-0.15	0.15	log value from GEO, segmented by DNAcopy/cbs
GSM281508	GSE11155	GPL6737	18632612	-0.15	0.15	log value from GEO, segmented by DNAcopy/cbs
GSM281509	GSE11155	GPL6737	18632612	-0.15	0.15	log value from GEO, segmented by DNAcopy/cbs
GSM281510	GSE11155	GPL6737	18632612	-0.15	0.15	log value from GEO, segmented by DNAcopy/cbs
GSM281511	GSE11155	GPL6737	18632612	-0.15	0.15	log value from GEO, segmented by DNAcopy/cbs
GSM281512	GSE11155	GPL6737	18632612	-0.15	0.15	log value from GEO, segmented by DNAcopy/cbs
GSM281513	GSE11155	GPL6737	18632612	-0.15	0.15	log value from GEO, segmented by DNAcopy/cbs
GSM281514	GSE11155	GPL6737	18632612	-0.15	0.15	log value from GEO, segmented by DNAcopy/cbs
GSM281515	GSE11155	GPL6737	18632612	-0.15	0.15	log value from GEO, segmented by DNAcopy/cbs
GSM281516	GSE11155	GPL6737	18632612	-0.15	0.15	log value from GEO, segmented by DNAcopy/cbs
GSM281517	GSE11155	GPL6737	18632612	-0.15	0.15	log value from GEO, segmented by DNAcopy/cbs
GSM281518	GSE11155	GPL6737	18632612	-0.15	0.15	log value from GEO, segmented by DNAcopy/cbs
GSM281519	GSE11155	GPL6737	18632612	-0.15	0.15	log value from GEO, segmented by DNAcopy/cbs
GSM281520	GSE11155	GPL6737	18632612	-0.15	0.15	log value from GEO, segmented by DNAcopy/cbs
GSM281521	GSE11155	GPL6737	18632612	-0.15	0.15	log value from GEO, segmented by DNAcopy/cbs
GSM281522	GSE11155	GPL6737	18632612	-0.15	0.15	log value from GEO, segmented by DNAcopy/cbs
GSM281523	GSE11155	GPL6737	18632612	-0.15	0.15	log value from GEO, segmented by DNAcopy/cbs
GSM281524	GSE11155	GPL6737	18632612	-0.15	0.15	log value from GEO, segmented by DNAcopy/cbs
GSM281525	GSE11155	GPL6737	18632612	-0.15	0.15	log value from GEO, segmented by DNAcopy/cbs
GSM281526	GSE11155	GPL6737	18632612	-0.15	0.15	log value from GEO, segmented by DNAcopy/cbs
GSM281527	GSE11155	GPL6737	18632612	-0.15	0.15	log value from GEO, segmented by DNAcopy/cbs
GSM281528	GSE11155	GPL6737	18632612	-0.15	0.15	log value from GEO, segmented by DNAcopy/cbs
GSM281530	GSE11155	GPL6737	18632612	-0.15	0.15	log value from GEO, segmented by DNAcopy/cbs
GSM281531	GSE11155	GPL6737	18632612	-0.15	0.15	log value from GEO, segmented by DNAcopy/cbs
GSM281532	GSE11155	GPL6737	18632612	-0.15	0.15	log value from GEO, segmented by DNAcopy/cbs
GSM281533	GSE11155	GPL6737	18632612	-0.15	0.15	log value from GEO, segmented by DNAcopy/cbs
GSM281534	GSE11155	GPL6737	18632612	-0.15	0.15	log value from GEO, segmented by DNAcopy/cbs
GSM281935	GSE11225	GPL6745	17361228	-0.15	0.15	log value from GEO, segmented by DNAcopy/cbs
GSM282642	GSE11225	GPL6745	17361228	-0.15	0.15	log value from GEO, segmented by DNAcopy/cbs
GSM283057	GSE11225	GPL2873	17361228	-0.15	0.15	log value from GEO, segmented by DNAcopy/cbs
GSM283058	GSE11225	GPL2873	17361228	-0.15	0.15	log value from GEO, segmented by DNAcopy/cbs
GSM284479	GSE11263	GPL6782	17086101	-0.15	0.15	log value from GEO, segmented by DNAcopy/cbs
GSM284480	GSE11263	GPL6782	17086101	-0.15	0.15	log value from GEO, segmented by DNAcopy/cbs
GSM284481	GSE11263	GPL6782	17086101	-0.15	0.15	log value from GEO, segmented by DNAcopy/cbs
GSM284482	GSE11263	GPL6782	17086101	-0.15	0.15	log value from GEO, segmented by DNAcopy/cbs
GSM284483	GSE11263	GPL6782	17086101	-0.15	0.15	log value from GEO, segmented by DNAcopy/cbs
GSM284484	GSE11263	GPL6782	17086101	-0.15	0.15	log value from GEO, segmented by DNAcopy/cbs
GSM284485	GSE11263	GPL6782	17086101	-0.15	0.15	log value from GEO, segmented by DNAcopy/cbs
GSM284486	GSE11263	GPL6782	17086101	-0.15	0.15	log value from GEO, segmented by DNAcopy/cbs
GSM284487	GSE11263	GPL6782	17086101	-0.15	0.15	log value from GEO, segmented by DNAcopy/cbs
GSM284488	GSE11263	GPL6782	17086101	-0.15	0.15	log value from GEO, segmented by DNAcopy/cbs
GSM284489	GSE11263	GPL6782	17086101	-0.15	0.15	log value from GEO, segmented by DNAcopy/cbs
GSM284490	GSE11263	GPL6782	17086101	-0.15	0.15	log value from GEO, segmented by DNAcopy/cbs
GSM284491	GSE11263	GPL6782	17086101	-0.15	0.15	log value from GEO, segmented by DNAcopy/cbs
GSM284492	GSE11263	GPL6782	17086101	-0.15	0.15	log value from GEO, segmented by DNAcopy/cbs
GSM284493	GSE11263	GPL6782	17086101	-0.15	0.15	log value from GEO, segmented by DNAcopy/cbs
GSM284494	GSE11263	GPL6782	17086101	-0.15	0.15	log value from GEO, segmented by DNAcopy/cbs
GSM284495	GSE11263	GPL6782	17086101	-0.15	0.15	log value from GEO, segmented by DNAcopy/cbs
GSM284496	GSE11263	GPL6782	17086101	-0.15	0.15	log value from GEO, segmented by DNAcopy/cbs
GSM284497	GSE11263	GPL6782	17086101	-0.15	0.15	log value from GEO, segmented by DNAcopy/cbs
GSM284498	GSE11263	GPL6782	17086101	-0.15	0.15	log value from GEO, segmented by DNAcopy/cbs
GSM284499	GSE11263	GPL6782	17086101	-0.15	0.15	log value from GEO, segmented by DNAcopy/cbs
GSM284500	GSE11263	GPL6782	17086101	-0.15	0.15	log value from GEO, segmented by DNAcopy/cbs
GSM284501	GSE11263	GPL6782	17086101	-0.15	0.15	log value from GEO, segmented by DNAcopy/cbs
GSM284502	GSE11263	GPL6782	17086101	-0.15	0.15	log value from GEO, segmented by DNAcopy/cbs
GSM284503	GSE11263	GPL6782	17086101	-0.15	0.15	log value from GEO, segmented by DNAcopy/cbs
GSM284504	GSE11263	GPL6782	17086101	-0.15	0.15	log value from GEO, segmented by DNAcopy/cbs
GSM284505	GSE11263	GPL6782	17086101	-0.15	0.15	log value from GEO, segmented by DNAcopy/cbs
GSM284506	GSE11263	GPL6782	17086101	-0.15	0.15	log value from GEO, segmented by DNAcopy/cbs
GSM284507	GSE11263	GPL6782	17086101	-0.15	0.15	log value from GEO, segmented by DNAcopy/cbs
GSM284508	GSE11263	GPL6782	17086101	-0.15	0.15	log value from GEO, segmented by DNAcopy/cbs
GSM284509	GSE11263	GPL6782	17086101	-0.15	0.15	log value from GEO, segmented by DNAcopy/cbs
GSM284510	GSE11263	GPL6782	17086101	-0.15	0.15	log value from GEO, segmented by DNAcopy/cbs
GSM284511	GSE11263	GPL6782	17086101	-0.15	0.15	log value from GEO, segmented by DNAcopy/cbs
GSM284512	GSE11263	GPL6782	17086101	-0.15	0.15	log value from GEO, segmented by DNAcopy/cbs
GSM284513	GSE11263	GPL6782	17086101	-0.15	0.15	log value from GEO, segmented by DNAcopy/cbs
GSM284514	GSE11263	GPL6782	17086101	-0.15	0.15	log value from GEO, segmented by DNAcopy/cbs
GSM284515	GSE11263	GPL6782	17086101	-0.15	0.15	log value from GEO, segmented by DNAcopy/cbs
GSM284516	GSE11263	GPL6782	17086101	-0.15	0.15	log value from GEO, segmented by DNAcopy/cbs
GSM284517	GSE11263	GPL6782	17086101	-0.15	0.15	log value from GEO, segmented by DNAcopy/cbs
GSM284518	GSE11263	GPL6782	17086101	-0.15	0.15	log value from GEO, segmented by DNAcopy/cbs
GSM284519	GSE11263	GPL6782	17086101	-0.15	0.15	log value from GEO, segmented by DNAcopy/cbs
GSM284520	GSE11263	GPL6782	17086101	-0.15	0.15	log value from GEO, segmented by DNAcopy/cbs
GSM284521	GSE11263	GPL6782	17086101	-0.15	0.15	log value from GEO, segmented by DNAcopy/cbs
GSM284522	GSE11263	GPL6782	17086101	-0.15	0.15	log value from GEO, segmented by DNAcopy/cbs
GSM284703	GSE11265	GPL6783	18974108	-0.15	0.15	log value from GEO, segmented by DNAcopy/cbs
GSM284704	GSE11265	GPL6783	18974108	-0.15	0.15	log value from GEO, segmented by DNAcopy/cbs
GSM284705	GSE11265	GPL6783	18974108	-0.15	0.15	log value from GEO, segmented by DNAcopy/cbs
GSM284706	GSE11265	GPL6783	18974108	-0.15	0.15	log value from GEO, segmented by DNAcopy/cbs
GSM284707	GSE11265	GPL6783	18974108	-0.15	0.15	log value from GEO, segmented by DNAcopy/cbs
GSM284708	GSE11265	GPL6783	18974108	-0.15	0.15	log value from GEO, segmented by DNAcopy/cbs
GSM284709	GSE11265	GPL6783	18974108	-0.15	0.15	log value from GEO, segmented by DNAcopy/cbs
GSM284710	GSE11265	GPL6783	18974108	-0.15	0.15	log value from GEO, segmented by DNAcopy/cbs
GSM284711	GSE11265	GPL6783	18974108	-0.15	0.15	log value from GEO, segmented by DNAcopy/cbs
GSM284712	GSE11265	GPL6783	18974108	-0.15	0.15	log value from GEO, segmented by DNAcopy/cbs
GSM284713	GSE11265	GPL6783	18974108	-0.15	0.15	log value from GEO, segmented by DNAcopy/cbs
GSM284714	GSE11265	GPL6783	18974108	-0.15	0.15	log value from GEO, segmented by DNAcopy/cbs
GSM284715	GSE11265	GPL6783	18974108	-0.15	0.15	log value from GEO, segmented by DNAcopy/cbs
GSM284716	GSE11265	GPL6783	18974108	-0.15	0.15	log value from GEO, segmented by DNAcopy/cbs
GSM284717	GSE11265	GPL6783	18974108	-0.15	0.15	log value from GEO, segmented by DNAcopy/cbs
GSM284718	GSE11265	GPL6783	18974108	-0.15	0.15	log value from GEO, segmented by DNAcopy/cbs
GSM284719	GSE11265	GPL6783	18974108	-0.15	0.15	log value from GEO, segmented by DNAcopy/cbs
GSM284720	GSE11265	GPL6783	18974108	-0.15	0.15	log value from GEO, segmented by DNAcopy/cbs
GSM284721	GSE11265	GPL6783	18974108	-0.15	0.15	log value from GEO, segmented by DNAcopy/cbs
GSM284722	GSE11265	GPL6783	18974108	-0.15	0.15	log value from GEO, segmented by DNAcopy/cbs
GSM284723	GSE11265	GPL6783	18974108	-0.15	0.15	log value from GEO, segmented by DNAcopy/cbs
GSM284724	GSE11265	GPL6783	18974108	-0.15	0.15	log value from GEO, segmented by DNAcopy/cbs
GSM284725	GSE11265	GPL6783	18974108	-0.15	0.15	log value from GEO, segmented by DNAcopy/cbs
GSM284726	GSE11265	GPL6783	18974108	-0.15	0.15	log value from GEO, segmented by DNAcopy/cbs
GSM284727	GSE11265	GPL6783	18974108	-0.15	0.15	log value from GEO, segmented by DNAcopy/cbs
GSM284728	GSE11265	GPL6783	18974108	-0.15	0.15	log value from GEO, segmented by DNAcopy/cbs
GSM284729	GSE11265	GPL6783	18974108	-0.15	0.15	log value from GEO, segmented by DNAcopy/cbs
GSM284730	GSE11265	GPL6783	18974108	-0.15	0.15	log value from GEO, segmented by DNAcopy/cbs
GSM284731	GSE11265	GPL6783	18974108	-0.15	0.15	log value from GEO, segmented by DNAcopy/cbs
GSM284732	GSE11265	GPL6783	18974108	-0.15	0.15	log value from GEO, segmented by DNAcopy/cbs
GSM284733	GSE11265	GPL6783	18974108	-0.15	0.15	log value from GEO, segmented by DNAcopy/cbs
GSM284734	GSE11265	GPL6783	18974108	-0.15	0.15	log value from GEO, segmented by DNAcopy/cbs
GSM284735	GSE11265	GPL6783	18974108	-0.15	0.15	log value from GEO, segmented by DNAcopy/cbs
GSM284736	GSE11265	GPL6783	18974108	-0.15	0.15	log value from GEO, segmented by DNAcopy/cbs
GSM284737	GSE11265	GPL6783	18974108	-0.15	0.15	log value from GEO, segmented by DNAcopy/cbs
GSM284738	GSE11265	GPL6783	18974108	-0.15	0.15	log value from GEO, segmented by DNAcopy/cbs
GSM284739	GSE11265	GPL6783	18974108	-0.15	0.15	log value from GEO, segmented by DNAcopy/cbs
GSM284740	GSE11265	GPL6783	18974108	-0.15	0.15	log value from GEO, segmented by DNAcopy/cbs
GSM284741	GSE11265	GPL6783	18974108	-0.15	0.15	log value from GEO, segmented by DNAcopy/cbs
GSM284742	GSE11265	GPL6783	18974108	-0.15	0.15	log value from GEO, segmented by DNAcopy/cbs
GSM284743	GSE11265	GPL6783	18974108	-0.15	0.15	log value from GEO, segmented by DNAcopy/cbs
GSM284744	GSE11265	GPL6783	18974108	-0.15	0.15	log value from GEO, segmented by DNAcopy/cbs
GSM284745	GSE11265	GPL6783	18974108	-0.15	0.15	log value from GEO, segmented by DNAcopy/cbs
GSM284746	GSE11265	GPL6783	18974108	-0.15	0.15	log value from GEO, segmented by DNAcopy/cbs
GSM284808	GSE11275	GPL2616	19627613	-0.15	0.15	log value from GEO, segmented by DNAcopy/cbs
GSM284809	GSE11275	GPL2616	19627613	-0.15	0.15	log value from GEO, segmented by DNAcopy/cbs
GSM284810	GSE11275	GPL2616	19627613	-0.15	0.15	log value from GEO, segmented by DNAcopy/cbs
GSM284811	GSE11275	GPL2616	19627613	-0.15	0.15	log value from GEO, segmented by DNAcopy/cbs
GSM284812	GSE11275	GPL2616	19627613	-0.15	0.15	log value from GEO, segmented by DNAcopy/cbs
GSM284813	GSE11275	GPL2616	19627613	-0.15	0.15	log value from GEO, segmented by DNAcopy/cbs
GSM284814	GSE11275	GPL2616	19627613	-0.15	0.15	log value from GEO, segmented by DNAcopy/cbs
GSM284815	GSE11275	GPL2616	19627613	-0.15	0.15	log value from GEO, segmented by DNAcopy/cbs
GSM284816	GSE11275	GPL2616	19627613	-0.15	0.15	log value from GEO, segmented by DNAcopy/cbs
GSM284817	GSE11275	GPL2616	19627613	-0.15	0.15	log value from GEO, segmented by DNAcopy/cbs
GSM284818	GSE11275	GPL2616	19627613	-0.15	0.15	log value from GEO, segmented by DNAcopy/cbs
GSM284819	GSE11275	GPL2616	19627613	-0.15	0.15	log value from GEO, segmented by DNAcopy/cbs
GSM284820	GSE11275	GPL2616	19627613	-0.15	0.15	log value from GEO, segmented by DNAcopy/cbs
GSM284821	GSE11275	GPL2616	19627613	-0.15	0.15	log value from GEO, segmented by DNAcopy/cbs
GSM284822	GSE11275	GPL2616	19627613	-0.15	0.15	log value from GEO, segmented by DNAcopy/cbs
GSM284823	GSE11275	GPL2616	19627613	-0.15	0.15	log value from GEO, segmented by DNAcopy/cbs
GSM284824	GSE11275	GPL2616	19627613	-0.15	0.15	log value from GEO, segmented by DNAcopy/cbs
GSM284825	GSE11275	GPL2043	19627613	-0.15	0.15	log value from GEO, segmented by DNAcopy/cbs
GSM284826	GSE11275	GPL2043	19627613	-0.15	0.15	log value from GEO, segmented by DNAcopy/cbs
GSM286886	GSE11318	GPL6400	18765795	-0.08	0.08	log value from GEO, segmented by DNAcopy/cbs
GSM286893	GSE11318	GPL6400	18765795	-0.08	0.08	log value from GEO, segmented by DNAcopy/cbs
GSM286894	GSE11318	GPL6400	18765795	-0.08	0.08	log value from GEO, segmented by DNAcopy/cbs
GSM286895	GSE11318	GPL6400	18765795	-0.08	0.08	log value from GEO, segmented by DNAcopy/cbs
GSM286896	GSE11318	GPL6400	18765795	-0.08	0.08	log value from GEO, segmented by DNAcopy/cbs
GSM286897	GSE11318	GPL6400	18765795	-0.08	0.08	log value from GEO, segmented by DNAcopy/cbs
GSM286898	GSE11318	GPL6400	18765795	-0.08	0.08	log value from GEO, segmented by DNAcopy/cbs
GSM286899	GSE11318	GPL6400	18765795	-0.08	0.08	log value from GEO, segmented by DNAcopy/cbs
GSM286900	GSE11318	GPL6400	18765795	-0.08	0.08	log value from GEO, segmented by DNAcopy/cbs
GSM286901	GSE11318	GPL6400	18765795	-0.08	0.08	log value from GEO, segmented by DNAcopy/cbs
GSM286902	GSE11318	GPL6400	18765795	-0.08	0.08	log value from GEO, segmented by DNAcopy/cbs
GSM286903	GSE11318	GPL6400	18765795	-0.08	0.08	log value from GEO, segmented by DNAcopy/cbs
GSM286904	GSE11318	GPL6400	18765795	-0.08	0.08	log value from GEO, segmented by DNAcopy/cbs
GSM286905	GSE11318	GPL6400	18765795	-0.08	0.08	log value from GEO, segmented by DNAcopy/cbs
GSM286906	GSE11318	GPL6400	18765795	-0.08	0.08	log value from GEO, segmented by DNAcopy/cbs
GSM286907	GSE11318	GPL6400	18765795	-0.08	0.08	log value from GEO, segmented by DNAcopy/cbs
GSM286908	GSE11318	GPL6400	18765795	-0.08	0.08	log value from GEO, segmented by DNAcopy/cbs
GSM286909	GSE11318	GPL6400	18765795	-0.08	0.08	log value from GEO, segmented by DNAcopy/cbs
GSM286910	GSE11318	GPL6400	18765795	-0.08	0.08	log value from GEO, segmented by DNAcopy/cbs
GSM286911	GSE11318	GPL6400	18765795	-0.08	0.08	log value from GEO, segmented by DNAcopy/cbs
GSM286912	GSE11318	GPL6400	18765795	-0.08	0.08	log value from GEO, segmented by DNAcopy/cbs
GSM286913	GSE11318	GPL6400	18765795	-0.08	0.08	log value from GEO, segmented by DNAcopy/cbs
GSM286914	GSE11318	GPL6400	18765795	-0.08	0.08	log value from GEO, segmented by DNAcopy/cbs
GSM286915	GSE11318	GPL6400	18765795	-0.08	0.08	log value from GEO, segmented by DNAcopy/cbs
GSM286916	GSE11318	GPL6400	18765795	-0.08	0.08	log value from GEO, segmented by DNAcopy/cbs
GSM286917	GSE11318	GPL6400	18765795	-0.08	0.08	log value from GEO, segmented by DNAcopy/cbs
GSM286918	GSE11318	GPL6400	18765795	-0.08	0.08	log value from GEO, segmented by DNAcopy/cbs
GSM286919	GSE11318	GPL6400	18765795	-0.08	0.08	log value from GEO, segmented by DNAcopy/cbs
GSM286920	GSE11318	GPL6400	18765795	-0.08	0.08	log value from GEO, segmented by DNAcopy/cbs
GSM286921	GSE11318	GPL6400	18765795	-0.08	0.08	log value from GEO, segmented by DNAcopy/cbs
GSM286922	GSE11318	GPL6400	18765795	-0.08	0.08	log value from GEO, segmented by DNAcopy/cbs
GSM286923	GSE11318	GPL6400	18765795	-0.08	0.08	log value from GEO, segmented by DNAcopy/cbs
GSM286924	GSE11318	GPL6400	18765795	-0.08	0.08	log value from GEO, segmented by DNAcopy/cbs
GSM286925	GSE11318	GPL6400	18765795	-0.08	0.08	log value from GEO, segmented by DNAcopy/cbs
GSM286926	GSE11318	GPL6400	18765795	-0.08	0.08	log value from GEO, segmented by DNAcopy/cbs
GSM286927	GSE11318	GPL6400	18765795	-0.08	0.08	log value from GEO, segmented by DNAcopy/cbs
GSM286928	GSE11318	GPL6400	18765795	-0.08	0.08	log value from GEO, segmented by DNAcopy/cbs
GSM286929	GSE11318	GPL6400	18765795	-0.08	0.08	log value from GEO, segmented by DNAcopy/cbs
GSM286930	GSE11318	GPL6400	18765795	-0.08	0.08	log value from GEO, segmented by DNAcopy/cbs
GSM286931	GSE11318	GPL6400	18765795	-0.08	0.08	log value from GEO, segmented by DNAcopy/cbs
GSM286932	GSE11318	GPL6400	18765795	-0.08	0.08	log value from GEO, segmented by DNAcopy/cbs
GSM286933	GSE11318	GPL6400	18765795	-0.08	0.08	log value from GEO, segmented by DNAcopy/cbs
GSM286934	GSE11318	GPL6400	18765795	-0.08	0.08	log value from GEO, segmented by DNAcopy/cbs
GSM286935	GSE11318	GPL6400	18765795	-0.08	0.08	log value from GEO, segmented by DNAcopy/cbs
GSM286936	GSE11318	GPL6400	18765795	-0.08	0.08	log value from GEO, segmented by DNAcopy/cbs
GSM286937	GSE11318	GPL6400	18765795	-0.08	0.08	log value from GEO, segmented by DNAcopy/cbs
GSM286938	GSE11318	GPL6400	18765795	-0.08	0.08	log value from GEO, segmented by DNAcopy/cbs
GSM286939	GSE11318	GPL6400	18765795	-0.08	0.08	log value from GEO, segmented by DNAcopy/cbs
GSM286940	GSE11318	GPL6400	18765795	-0.08	0.08	log value from GEO, segmented by DNAcopy/cbs
GSM286941	GSE11318	GPL6400	18765795	-0.08	0.08	log value from GEO, segmented by DNAcopy/cbs
GSM286942	GSE11318	GPL6400	18765795	-0.08	0.08	log value from GEO, segmented by DNAcopy/cbs
GSM286943	GSE11318	GPL6400	18765795	-0.08	0.08	log value from GEO, segmented by DNAcopy/cbs
GSM286944	GSE11318	GPL6400	18765795	-0.08	0.08	log value from GEO, segmented by DNAcopy/cbs
GSM286945	GSE11318	GPL6400	18765795	-0.08	0.08	log value from GEO, segmented by DNAcopy/cbs
GSM286946	GSE11318	GPL6400	18765795	-0.08	0.08	log value from GEO, segmented by DNAcopy/cbs
GSM286947	GSE11318	GPL6400	18765795	-0.08	0.08	log value from GEO, segmented by DNAcopy/cbs
GSM286948	GSE11318	GPL6400	18765795	-0.08	0.08	log value from GEO, segmented by DNAcopy/cbs
GSM286949	GSE11318	GPL6400	18765795	-0.08	0.08	log value from GEO, segmented by DNAcopy/cbs
GSM286950	GSE11318	GPL6400	18765795	-0.08	0.08	log value from GEO, segmented by DNAcopy/cbs
GSM286951	GSE11318	GPL6400	18765795	-0.08	0.08	log value from GEO, segmented by DNAcopy/cbs
GSM286952	GSE11318	GPL6400	18765795	-0.08	0.08	log value from GEO, segmented by DNAcopy/cbs
GSM286953	GSE11318	GPL6400	18765795	-0.08	0.08	log value from GEO, segmented by DNAcopy/cbs
GSM286954	GSE11318	GPL6400	18765795	-0.08	0.08	log value from GEO, segmented by DNAcopy/cbs
GSM286955	GSE11318	GPL6400	18765795	-0.08	0.08	log value from GEO, segmented by DNAcopy/cbs
GSM286956	GSE11318	GPL6400	18765795	-0.08	0.08	log value from GEO, segmented by DNAcopy/cbs
GSM286957	GSE11318	GPL6400	18765795	-0.08	0.08	log value from GEO, segmented by DNAcopy/cbs
GSM286958	GSE11318	GPL6400	18765795	-0.08	0.08	log value from GEO, segmented by DNAcopy/cbs
GSM286959	GSE11318	GPL6400	18765795	-0.08	0.08	log value from GEO, segmented by DNAcopy/cbs
GSM286960	GSE11318	GPL6400	18765795	-0.08	0.08	log value from GEO, segmented by DNAcopy/cbs
GSM286961	GSE11318	GPL6400	18765795	-0.08	0.08	log value from GEO, segmented by DNAcopy/cbs
GSM286962	GSE11318	GPL6400	18765795	-0.08	0.08	log value from GEO, segmented by DNAcopy/cbs
GSM286963	GSE11318	GPL6400	18765795	-0.08	0.08	log value from GEO, segmented by DNAcopy/cbs
GSM286964	GSE11318	GPL6400	18765795	-0.08	0.08	log value from GEO, segmented by DNAcopy/cbs
GSM286965	GSE11318	GPL6400	18765795	-0.08	0.08	log value from GEO, segmented by DNAcopy/cbs
GSM286966	GSE11318	GPL6400	18765795	-0.08	0.08	log value from GEO, segmented by DNAcopy/cbs
GSM286967	GSE11318	GPL6400	18765795	-0.08	0.08	log value from GEO, segmented by DNAcopy/cbs
GSM286968	GSE11318	GPL6400	18765795	-0.08	0.08	log value from GEO, segmented by DNAcopy/cbs
GSM286969	GSE11318	GPL6400	18765795	-0.08	0.08	log value from GEO, segmented by DNAcopy/cbs
GSM286970	GSE11318	GPL6400	18765795	-0.08	0.08	log value from GEO, segmented by DNAcopy/cbs
GSM286971	GSE11318	GPL6400	18765795	-0.08	0.08	log value from GEO, segmented by DNAcopy/cbs
GSM286972	GSE11318	GPL6400	18765795	-0.08	0.08	log value from GEO, segmented by DNAcopy/cbs
GSM286973	GSE11318	GPL6400	18765795	-0.08	0.08	log value from GEO, segmented by DNAcopy/cbs
GSM286974	GSE11318	GPL6400	18765795	-0.08	0.08	log value from GEO, segmented by DNAcopy/cbs
GSM286975	GSE11318	GPL6400	18765795	-0.08	0.08	log value from GEO, segmented by DNAcopy/cbs
GSM286976	GSE11318	GPL6400	18765795	-0.08	0.08	log value from GEO, segmented by DNAcopy/cbs
GSM286977	GSE11318	GPL6400	18765795	-0.08	0.08	log value from GEO, segmented by DNAcopy/cbs
GSM286978	GSE11318	GPL6400	18765795	-0.08	0.08	log value from GEO, segmented by DNAcopy/cbs
GSM286979	GSE11318	GPL6400	18765795	-0.08	0.08	log value from GEO, segmented by DNAcopy/cbs
GSM286980	GSE11318	GPL6400	18765795	-0.08	0.08	log value from GEO, segmented by DNAcopy/cbs
GSM286981	GSE11318	GPL6400	18765795	-0.08	0.08	log value from GEO, segmented by DNAcopy/cbs
GSM286982	GSE11318	GPL6400	18765795	-0.08	0.08	log value from GEO, segmented by DNAcopy/cbs
GSM286983	GSE11318	GPL6400	18765795	-0.08	0.08	log value from GEO, segmented by DNAcopy/cbs
GSM286984	GSE11318	GPL6400	18765795	-0.08	0.08	log value from GEO, segmented by DNAcopy/cbs
GSM286985	GSE11318	GPL6400	18765795	-0.08	0.08	log value from GEO, segmented by DNAcopy/cbs
GSM286986	GSE11318	GPL6400	18765795	-0.08	0.08	log value from GEO, segmented by DNAcopy/cbs
GSM286987	GSE11318	GPL6400	18765795	-0.08	0.08	log value from GEO, segmented by DNAcopy/cbs
GSM286988	GSE11318	GPL6400	18765795	-0.08	0.08	log value from GEO, segmented by DNAcopy/cbs
GSM286989	GSE11318	GPL6400	18765795	-0.08	0.08	log value from GEO, segmented by DNAcopy/cbs
GSM286990	GSE11318	GPL6400	18765795	-0.08	0.08	log value from GEO, segmented by DNAcopy/cbs
GSM286991	GSE11318	GPL6400	18765795	-0.08	0.08	log value from GEO, segmented by DNAcopy/cbs
GSM286992	GSE11318	GPL6400	18765795	-0.08	0.08	log value from GEO, segmented by DNAcopy/cbs
GSM286993	GSE11318	GPL6400	18765795	-0.08	0.08	log value from GEO, segmented by DNAcopy/cbs
GSM286994	GSE11318	GPL6400	18765795	-0.08	0.08	log value from GEO, segmented by DNAcopy/cbs
GSM286995	GSE11318	GPL6400	18765795	-0.08	0.08	log value from GEO, segmented by DNAcopy/cbs
GSM286996	GSE11318	GPL6400	18765795	-0.08	0.08	log value from GEO, segmented by DNAcopy/cbs
GSM286997	GSE11318	GPL6400	18765795	-0.08	0.08	log value from GEO, segmented by DNAcopy/cbs
GSM286998	GSE11318	GPL6400	18765795	-0.08	0.08	log value from GEO, segmented by DNAcopy/cbs
GSM286999	GSE11318	GPL6400	18765795	-0.08	0.08	log value from GEO, segmented by DNAcopy/cbs
GSM287000	GSE11318	GPL6400	18765795	-0.08	0.08	log value from GEO, segmented by DNAcopy/cbs
GSM287001	GSE11318	GPL6400	18765795	-0.08	0.08	log value from GEO, segmented by DNAcopy/cbs
GSM287002	GSE11318	GPL6400	18765795	-0.08	0.08	log value from GEO, segmented by DNAcopy/cbs
GSM287003	GSE11318	GPL6400	18765795	-0.08	0.08	log value from GEO, segmented by DNAcopy/cbs
GSM287004	GSE11318	GPL6400	18765795	-0.08	0.08	log value from GEO, segmented by DNAcopy/cbs
GSM287005	GSE11318	GPL6400	18765795	-0.08	0.08	log value from GEO, segmented by DNAcopy/cbs
GSM287006	GSE11318	GPL6400	18765795	-0.08	0.08	log value from GEO, segmented by DNAcopy/cbs
GSM287007	GSE11318	GPL6400	18765795	-0.08	0.08	log value from GEO, segmented by DNAcopy/cbs
GSM287008	GSE11318	GPL6400	18765795	-0.08	0.08	log value from GEO, segmented by DNAcopy/cbs
GSM287009	GSE11318	GPL6400	18765795	-0.08	0.08	log value from GEO, segmented by DNAcopy/cbs
GSM287010	GSE11318	GPL6400	18765795	-0.08	0.08	log value from GEO, segmented by DNAcopy/cbs
GSM287011	GSE11318	GPL6400	18765795	-0.08	0.08	log value from GEO, segmented by DNAcopy/cbs
GSM287012	GSE11318	GPL6400	18765795	-0.08	0.08	log value from GEO, segmented by DNAcopy/cbs
GSM287013	GSE11318	GPL6400	18765795	-0.08	0.08	log value from GEO, segmented by DNAcopy/cbs
GSM287014	GSE11318	GPL6400	18765795	-0.08	0.08	log value from GEO, segmented by DNAcopy/cbs
GSM287015	GSE11318	GPL6400	18765795	-0.08	0.08	log value from GEO, segmented by DNAcopy/cbs
GSM287016	GSE11318	GPL6400	18765795	-0.08	0.08	log value from GEO, segmented by DNAcopy/cbs
GSM287017	GSE11318	GPL6400	18765795	-0.08	0.08	log value from GEO, segmented by DNAcopy/cbs
GSM287018	GSE11318	GPL6400	18765795	-0.08	0.08	log value from GEO, segmented by DNAcopy/cbs
GSM287019	GSE11318	GPL6400	18765795	-0.08	0.08	log value from GEO, segmented by DNAcopy/cbs
GSM287020	GSE11318	GPL6400	18765795	-0.08	0.08	log value from GEO, segmented by DNAcopy/cbs
GSM287021	GSE11318	GPL6400	18765795	-0.08	0.08	log value from GEO, segmented by DNAcopy/cbs
GSM287022	GSE11318	GPL6400	18765795	-0.08	0.08	log value from GEO, segmented by DNAcopy/cbs
GSM287023	GSE11318	GPL6400	18765795	-0.08	0.08	log value from GEO, segmented by DNAcopy/cbs
GSM287024	GSE11318	GPL6400	18765795	-0.08	0.08	log value from GEO, segmented by DNAcopy/cbs
GSM287025	GSE11318	GPL6400	18765795	-0.08	0.08	log value from GEO, segmented by DNAcopy/cbs
GSM287026	GSE11318	GPL6400	18765795	-0.08	0.08	log value from GEO, segmented by DNAcopy/cbs
GSM287027	GSE11318	GPL6400	18765795	-0.08	0.08	log value from GEO, segmented by DNAcopy/cbs
GSM287028	GSE11318	GPL6400	18765795	-0.08	0.08	log value from GEO, segmented by DNAcopy/cbs
GSM287029	GSE11318	GPL6400	18765795	-0.08	0.08	log value from GEO, segmented by DNAcopy/cbs
GSM287030	GSE11318	GPL6400	18765795	-0.08	0.08	log value from GEO, segmented by DNAcopy/cbs
GSM287031	GSE11318	GPL6400	18765795	-0.08	0.08	log value from GEO, segmented by DNAcopy/cbs
GSM287032	GSE11318	GPL6400	18765795	-0.08	0.08	log value from GEO, segmented by DNAcopy/cbs
GSM287033	GSE11318	GPL6400	18765795	-0.08	0.08	log value from GEO, segmented by DNAcopy/cbs
GSM287034	GSE11318	GPL6400	18765795	-0.08	0.08	log value from GEO, segmented by DNAcopy/cbs
GSM287035	GSE11318	GPL6400	18765795	-0.08	0.08	log value from GEO, segmented by DNAcopy/cbs
GSM287036	GSE11318	GPL6400	18765795	-0.08	0.08	log value from GEO, segmented by DNAcopy/cbs
GSM287037	GSE11318	GPL6400	18765795	-0.08	0.08	log value from GEO, segmented by DNAcopy/cbs
GSM287038	GSE11318	GPL6400	18765795	-0.08	0.08	log value from GEO, segmented by DNAcopy/cbs
GSM287039	GSE11318	GPL6400	18765795	-0.08	0.08	log value from GEO, segmented by DNAcopy/cbs
GSM287040	GSE11318	GPL6400	18765795	-0.08	0.08	log value from GEO, segmented by DNAcopy/cbs
GSM287041	GSE11318	GPL6400	18765795	-0.08	0.08	log value from GEO, segmented by DNAcopy/cbs
GSM287042	GSE11318	GPL6400	18765795	-0.08	0.08	log value from GEO, segmented by DNAcopy/cbs
GSM287043	GSE11318	GPL6400	18765795	-0.08	0.08	log value from GEO, segmented by DNAcopy/cbs
GSM287044	GSE11318	GPL6400	18765795	-0.08	0.08	log value from GEO, segmented by DNAcopy/cbs
GSM287045	GSE11318	GPL6400	18765795	-0.08	0.08	log value from GEO, segmented by DNAcopy/cbs
GSM287046	GSE11318	GPL6400	18765795	-0.08	0.08	log value from GEO, segmented by DNAcopy/cbs
GSM287047	GSE11318	GPL6400	18765795	-0.08	0.08	log value from GEO, segmented by DNAcopy/cbs
GSM287048	GSE11318	GPL6400	18765795	-0.08	0.08	log value from GEO, segmented by DNAcopy/cbs
GSM287049	GSE11318	GPL6400	18765795	-0.08	0.08	log value from GEO, segmented by DNAcopy/cbs
GSM287050	GSE11318	GPL6400	18765795	-0.08	0.08	log value from GEO, segmented by DNAcopy/cbs
GSM287051	GSE11318	GPL6400	18765795	-0.08	0.08	log value from GEO, segmented by DNAcopy/cbs
GSM287052	GSE11318	GPL6400	18765795	-0.08	0.08	log value from GEO, segmented by DNAcopy/cbs
GSM287053	GSE11318	GPL6400	18765795	-0.08	0.08	log value from GEO, segmented by DNAcopy/cbs
GSM287054	GSE11318	GPL6400	18765795	-0.08	0.08	log value from GEO, segmented by DNAcopy/cbs
GSM287055	GSE11318	GPL6400	18765795	-0.08	0.08	log value from GEO, segmented by DNAcopy/cbs
GSM287056	GSE11318	GPL6400	18765795	-0.08	0.08	log value from GEO, segmented by DNAcopy/cbs
GSM287057	GSE11318	GPL6400	18765795	-0.08	0.08	log value from GEO, segmented by DNAcopy/cbs
GSM287058	GSE11318	GPL6400	18765795	-0.08	0.08	log value from GEO, segmented by DNAcopy/cbs
GSM287059	GSE11318	GPL6400	18765795	-0.08	0.08	log value from GEO, segmented by DNAcopy/cbs
GSM287060	GSE11318	GPL6400	18765795	-0.08	0.08	log value from GEO, segmented by DNAcopy/cbs
GSM287061	GSE11318	GPL6400	18765795	-0.08	0.08	log value from GEO, segmented by DNAcopy/cbs
GSM287062	GSE11318	GPL6400	18765795	-0.08	0.08	log value from GEO, segmented by DNAcopy/cbs
GSM287063	GSE11318	GPL6400	18765795	-0.08	0.08	log value from GEO, segmented by DNAcopy/cbs
GSM287064	GSE11318	GPL6400	18765795	-0.08	0.08	log value from GEO, segmented by DNAcopy/cbs
GSM287065	GSE11318	GPL6400	18765795	-0.08	0.08	log value from GEO, segmented by DNAcopy/cbs
GSM287066	GSE11318	GPL6400	18765795	-0.08	0.08	log value from GEO, segmented by DNAcopy/cbs
GSM287067	GSE11318	GPL6400	18765795	-0.08	0.08	log value from GEO, segmented by DNAcopy/cbs
GSM287068	GSE11318	GPL6400	18765795	-0.08	0.08	log value from GEO, segmented by DNAcopy/cbs
GSM287069	GSE11318	GPL6400	18765795	-0.08	0.08	log value from GEO, segmented by DNAcopy/cbs
GSM287070	GSE11318	GPL6400	18765795	-0.08	0.08	log value from GEO, segmented by DNAcopy/cbs
GSM287071	GSE11318	GPL6400	18765795	-0.08	0.08	log value from GEO, segmented by DNAcopy/cbs
GSM287072	GSE11318	GPL6400	18765795	-0.08	0.08	log value from GEO, segmented by DNAcopy/cbs
GSM287073	GSE11318	GPL6400	18765795	-0.08	0.08	log value from GEO, segmented by DNAcopy/cbs
GSM287074	GSE11318	GPL6400	18765795	-0.08	0.08	log value from GEO, segmented by DNAcopy/cbs
GSM287075	GSE11318	GPL6400	18765795	-0.08	0.08	log value from GEO, segmented by DNAcopy/cbs
GSM287076	GSE11318	GPL6400	18765795	-0.08	0.08	log value from GEO, segmented by DNAcopy/cbs
GSM287077	GSE11318	GPL6400	18765795	-0.08	0.08	log value from GEO, segmented by DNAcopy/cbs
GSM287078	GSE11318	GPL6400	18765795	-0.08	0.08	log value from GEO, segmented by DNAcopy/cbs
GSM287079	GSE11318	GPL6400	18765795	-0.08	0.08	log value from GEO, segmented by DNAcopy/cbs
GSM287080	GSE11318	GPL6400	18765795	-0.08	0.08	log value from GEO, segmented by DNAcopy/cbs
GSM287081	GSE11318	GPL6400	18765795	-0.08	0.08	log value from GEO, segmented by DNAcopy/cbs
GSM287082	GSE11318	GPL6400	18765795	-0.08	0.08	log value from GEO, segmented by DNAcopy/cbs
GSM287083	GSE11318	GPL6400	18765795	-0.08	0.08	log value from GEO, segmented by DNAcopy/cbs
GSM287084	GSE11318	GPL6400	18765795	-0.08	0.08	log value from GEO, segmented by DNAcopy/cbs
GSM287085	GSE11318	GPL6400	18765795	-0.08	0.08	log value from GEO, segmented by DNAcopy/cbs
GSM287086	GSE11318	GPL6400	18765795	-0.08	0.08	log value from GEO, segmented by DNAcopy/cbs
GSM287087	GSE11318	GPL6400	18765795	-0.08	0.08	log value from GEO, segmented by DNAcopy/cbs
GSM287088	GSE11318	GPL6400	18765795	-0.08	0.08	log value from GEO, segmented by DNAcopy/cbs
GSM287089	GSE11318	GPL6400	18765795	-0.08	0.08	log value from GEO, segmented by DNAcopy/cbs
GSM287090	GSE11318	GPL6400	18765795	-0.08	0.08	log value from GEO, segmented by DNAcopy/cbs
GSM287091	GSE11318	GPL6400	18765795	-0.08	0.08	log value from GEO, segmented by DNAcopy/cbs
GSM287092	GSE11318	GPL6400	18765795	-0.08	0.08	log value from GEO, segmented by DNAcopy/cbs
GSM287093	GSE11318	GPL6400	18765795	-0.08	0.08	log value from GEO, segmented by DNAcopy/cbs
GSM287094	GSE11318	GPL6400	18765795	-0.08	0.08	log value from GEO, segmented by DNAcopy/cbs
GSM287989	GSE11411	GPL4091	18698372	-0.15	0.15	log value from GEO, segmented by DNAcopy/cbs
GSM287990	GSE11411	GPL4091	18698372	-0.15	0.15	log value from GEO, segmented by DNAcopy/cbs
GSM291359	GSE11573	GPL2843	19147580	-0.15	0.15	log value from GEO, segmented by DNAcopy/cbs
GSM291361	GSE11573	GPL2843	19147580	-0.15	0.15	log value from GEO, segmented by DNAcopy/cbs
GSM291362	GSE11573	GPL2843	19147580	-0.15	0.15	log value from GEO, segmented by DNAcopy/cbs
GSM291363	GSE11573	GPL2843	19147580	-0.15	0.15	log value from GEO, segmented by DNAcopy/cbs
GSM291364	GSE11573	GPL2843	19147580	-0.15	0.15	log value from GEO, segmented by DNAcopy/cbs
GSM291365	GSE11573	GPL2843	19147580	-0.15	0.15	log value from GEO, segmented by DNAcopy/cbs
GSM291366	GSE11573	GPL2843	19147580	-0.15	0.15	log value from GEO, segmented by DNAcopy/cbs
GSM291367	GSE11573	GPL2843	19147580	-0.15	0.15	log value from GEO, segmented by DNAcopy/cbs
GSM291368	GSE11573	GPL2843	19147580	-0.15	0.15	log value from GEO, segmented by DNAcopy/cbs
GSM291369	GSE11573	GPL2843	19147580	-0.15	0.15	log value from GEO, segmented by DNAcopy/cbs
GSM291370	GSE11573	GPL2843	19147580	-0.15	0.15	log value from GEO, segmented by DNAcopy/cbs
GSM291371	GSE11573	GPL2843	19147580	-0.15	0.15	log value from GEO, segmented by DNAcopy/cbs
GSM291372	GSE11573	GPL2843	19147580	-0.15	0.15	log value from GEO, segmented by DNAcopy/cbs
GSM291373	GSE11573	GPL2843	19147580	-0.15	0.15	log value from GEO, segmented by DNAcopy/cbs
GSM291374	GSE11573	GPL2843	19147580	-0.15	0.15	log value from GEO, segmented by DNAcopy/cbs
GSM291375	GSE11573	GPL2843	19147580	-0.15	0.15	log value from GEO, segmented by DNAcopy/cbs
GSM291376	GSE11573	GPL2843	19147580	-0.15	0.15	log value from GEO, segmented by DNAcopy/cbs
GSM291377	GSE11573	GPL2843	19147580	-0.15	0.15	log value from GEO, segmented by DNAcopy/cbs
GSM291378	GSE11573	GPL2843	19147580	-0.15	0.15	log value from GEO, segmented by DNAcopy/cbs
GSM291379	GSE11573	GPL2843	19147580	-0.15	0.15	log value from GEO, segmented by DNAcopy/cbs
GSM291380	GSE11573	GPL2843	19147580	-0.15	0.15	log value from GEO, segmented by DNAcopy/cbs
GSM291381	GSE11573	GPL2843	19147580	-0.15	0.15	log value from GEO, segmented by DNAcopy/cbs
GSM291382	GSE11573	GPL2843	19147580	-0.15	0.15	log value from GEO, segmented by DNAcopy/cbs
GSM291383	GSE11573	GPL2843	19147580	-0.15	0.15	log value from GEO, segmented by DNAcopy/cbs
GSM291384	GSE11573	GPL2843	19147580	-0.15	0.15	log value from GEO, segmented by DNAcopy/cbs
GSM291385	GSE11573	GPL2843	19147580	-0.15	0.15	log value from GEO, segmented by DNAcopy/cbs
GSM291386	GSE11573	GPL2843	19147580	-0.15	0.15	log value from GEO, segmented by DNAcopy/cbs
GSM291387	GSE11573	GPL2843	19147580	-0.15	0.15	log value from GEO, segmented by DNAcopy/cbs
GSM291388	GSE11573	GPL2843	19147580	-0.15	0.15	log value from GEO, segmented by DNAcopy/cbs
GSM291389	GSE11573	GPL2843	19147580	-0.15	0.15	log value from GEO, segmented by DNAcopy/cbs
GSM291390	GSE11573	GPL2843	19147580	-0.15	0.15	log value from GEO, segmented by DNAcopy/cbs
GSM291391	GSE11573	GPL2843	19147580	-0.15	0.15	log value from GEO, segmented by DNAcopy/cbs
GSM291392	GSE11573	GPL2843	19147580	-0.15	0.15	log value from GEO, segmented by DNAcopy/cbs
GSM291393	GSE11573	GPL2843	19147580	-0.15	0.15	log value from GEO, segmented by DNAcopy/cbs
GSM291394	GSE11573	GPL2843	19147580	-0.15	0.15	log value from GEO, segmented by DNAcopy/cbs
GSM291395	GSE11573	GPL2843	19147580	-0.15	0.15	log value from GEO, segmented by DNAcopy/cbs
GSM291396	GSE11573	GPL2843	19147580	-0.15	0.15	log value from GEO, segmented by DNAcopy/cbs
GSM291397	GSE11573	GPL2843	19147580	-0.15	0.15	log value from GEO, segmented by DNAcopy/cbs
GSM291398	GSE11573	GPL2843	19147580	-0.15	0.15	log value from GEO, segmented by DNAcopy/cbs
GSM291399	GSE11573	GPL2843	19147580	-0.15	0.15	log value from GEO, segmented by DNAcopy/cbs
GSM291400	GSE11573	GPL2843	19147580	-0.15	0.15	log value from GEO, segmented by DNAcopy/cbs
GSM291401	GSE11573	GPL2843	19147580	-0.15	0.15	log value from GEO, segmented by DNAcopy/cbs
GSM291402	GSE11573	GPL2843	19147580	-0.15	0.15	log value from GEO, segmented by DNAcopy/cbs
GSM291403	GSE11573	GPL2843	19147580	-0.15	0.15	log value from GEO, segmented by DNAcopy/cbs
GSM291404	GSE11573	GPL2843	19147580	-0.15	0.15	log value from GEO, segmented by DNAcopy/cbs
GSM291405	GSE11573	GPL2843	19147580	-0.15	0.15	log value from GEO, segmented by DNAcopy/cbs
GSM322566	GSE11573	GPL5477	19147580	-0.15	0.15	log value from GEO, segmented by DNAcopy/cbs
GSM322567	GSE11573	GPL5477	19147580	-0.15	0.15	log value from GEO, segmented by DNAcopy/cbs
GSM322569	GSE11573	GPL5477	19147580	-0.15	0.15	log value from GEO, segmented by DNAcopy/cbs
GSM322571	GSE11573	GPL5477	19147580	-0.15	0.15	log value from GEO, segmented by DNAcopy/cbs
GSM322573	GSE11573	GPL5477	19147580	-0.15	0.15	log value from GEO, segmented by DNAcopy/cbs
GSM322574	GSE11573	GPL5477	19147580	-0.15	0.15	log value from GEO, segmented by DNAcopy/cbs
GSM289383	GSE11872	GPL6853	19058220	-0.15	0.15	log value from GEO, segmented by DNAcopy/cbs
GSM289384	GSE11872	GPL6853	19058220	-0.15	0.15	log value from GEO, segmented by DNAcopy/cbs
GSM289385	GSE11872	GPL6853	19058220	-0.15	0.15	log value from GEO, segmented by DNAcopy/cbs
GSM289386	GSE11872	GPL6853	19058220	-0.15	0.15	log value from GEO, segmented by DNAcopy/cbs
GSM289387	GSE11872	GPL6853	19058220	-0.15	0.15	log value from GEO, segmented by DNAcopy/cbs
GSM289388	GSE11872	GPL6853	19058220	-0.15	0.15	log value from GEO, segmented by DNAcopy/cbs
GSM289416	GSE11872	GPL6853	19058220	-0.15	0.15	log value from GEO, segmented by DNAcopy/cbs
GSM289417	GSE11872	GPL6853	19058220	-0.15	0.15	log value from GEO, segmented by DNAcopy/cbs
GSM301416	GSE11929	GPL3441	19486517	-0.15	0.15	log value from GEO, segmented by DNAcopy/cbs
GSM301417	GSE11929	GPL3441	19486517	-0.15	0.15	log value from GEO, segmented by DNAcopy/cbs
GSM301418	GSE11929	GPL3441	19486517	-0.15	0.15	log value from GEO, segmented by DNAcopy/cbs
GSM301419	GSE11929	GPL2843	19486517	-0.15	0.15	log value from GEO, segmented by DNAcopy/cbs
GSM301420	GSE11929	GPL3441	19486517	-0.15	0.15	log value from GEO, segmented by DNAcopy/cbs
GSM301421	GSE11929	GPL3441	19486517	-0.15	0.15	log value from GEO, segmented by DNAcopy/cbs
GSM301422	GSE11929	GPL2843	19486517	-0.15	0.15	log value from GEO, segmented by DNAcopy/cbs
GSM301423	GSE11929	GPL3441	19486517	-0.15	0.15	log value from GEO, segmented by DNAcopy/cbs
GSM301424	GSE11929	GPL3441	19486517	-0.15	0.15	log value from GEO, segmented by DNAcopy/cbs
GSM301425	GSE11929	GPL2843	19486517	-0.15	0.15	log value from GEO, segmented by DNAcopy/cbs
GSM301426	GSE11929	GPL2843	19486517	-0.15	0.15	log value from GEO, segmented by DNAcopy/cbs
GSM301427	GSE11929	GPL2843	19486517	-0.15	0.15	log value from GEO, segmented by DNAcopy/cbs
GSM301428	GSE11929	GPL3441	19486517	-0.15	0.15	log value from GEO, segmented by DNAcopy/cbs
GSM301429	GSE11929	GPL2843	19486517	-0.15	0.15	log value from GEO, segmented by DNAcopy/cbs
GSM301430	GSE11929	GPL2843	19486517	-0.15	0.15	log value from GEO, segmented by DNAcopy/cbs
GSM301431	GSE11929	GPL3441	19486517	-0.15	0.15	log value from GEO, segmented by DNAcopy/cbs
GSM301432	GSE11929	GPL3441	19486517	-0.15	0.15	log value from GEO, segmented by DNAcopy/cbs
GSM301433	GSE11929	GPL3441	19486517	-0.15	0.15	log value from GEO, segmented by DNAcopy/cbs
GSM301434	GSE11929	GPL2843	19486517	-0.15	0.15	log value from GEO, segmented by DNAcopy/cbs
GSM301435	GSE11929	GPL3441	19486517	-0.15	0.15	log value from GEO, segmented by DNAcopy/cbs
GSM301436	GSE11929	GPL3441	19486517	-0.15	0.15	log value from GEO, segmented by DNAcopy/cbs
GSM301437	GSE11929	GPL3441	19486517	-0.15	0.15	log value from GEO, segmented by DNAcopy/cbs
GSM301438	GSE11929	GPL3441	19486517	-0.15	0.15	log value from GEO, segmented by DNAcopy/cbs
GSM301439	GSE11929	GPL3441	19486517	-0.15	0.15	log value from GEO, segmented by DNAcopy/cbs
GSM301440	GSE11929	GPL3441	19486517	-0.15	0.15	log value from GEO, segmented by DNAcopy/cbs
GSM301441	GSE11929	GPL3441	19486517	-0.15	0.15	log value from GEO, segmented by DNAcopy/cbs
GSM301442	GSE11929	GPL2843	19486517	-0.15	0.15	log value from GEO, segmented by DNAcopy/cbs
GSM301443	GSE11929	GPL2843	19486517	-0.15	0.15	log value from GEO, segmented by DNAcopy/cbs
GSM301444	GSE11929	GPL2843	19486517	-0.15	0.15	log value from GEO, segmented by DNAcopy/cbs
GSM301445	GSE11929	GPL2843	19486517	-0.15	0.15	log value from GEO, segmented by DNAcopy/cbs
GSM301446	GSE11929	GPL3441	19486517	-0.15	0.15	log value from GEO, segmented by DNAcopy/cbs
GSM301447	GSE11929	GPL3441	19486517	-0.15	0.15	log value from GEO, segmented by DNAcopy/cbs
GSM301448	GSE11929	GPL3441	19486517	-0.15	0.15	log value from GEO, segmented by DNAcopy/cbs
GSM301449	GSE11929	GPL2843	19486517	-0.15	0.15	log value from GEO, segmented by DNAcopy/cbs
GSM301450	GSE11929	GPL3441	19486517	-0.15	0.15	log value from GEO, segmented by DNAcopy/cbs
GSM301451	GSE11929	GPL2843	19486517	-0.15	0.15	log value from GEO, segmented by DNAcopy/cbs
GSM301452	GSE11929	GPL2843	19486517	-0.15	0.15	log value from GEO, segmented by DNAcopy/cbs
GSM301453	GSE11929	GPL3441	19486517	-0.15	0.15	log value from GEO, segmented by DNAcopy/cbs
GSM301454	GSE11929	GPL2843	19486517	-0.15	0.15	log value from GEO, segmented by DNAcopy/cbs
GSM301473	GSE11931	GPL3441	19486517,16314836	-0.15	0.15	log value from GEO, segmented by DNAcopy/cbs
GSM301474	GSE11931	GPL3441	19486517,16314836	-0.15	0.15	log value from GEO, segmented by DNAcopy/cbs
GSM301475	GSE11931	GPL3441	19486517,16314836	-0.15	0.15	log value from GEO, segmented by DNAcopy/cbs
GSM301476	GSE11931	GPL3441	19486517,16314836	-0.15	0.15	log value from GEO, segmented by DNAcopy/cbs
GSM301477	GSE11931	GPL3441	19486517,16314836	-0.15	0.15	log value from GEO, segmented by DNAcopy/cbs
GSM301478	GSE11931	GPL3441	19486517,16314836	-0.15	0.15	log value from GEO, segmented by DNAcopy/cbs
GSM301479	GSE11931	GPL3441	19486517,16314836	-0.15	0.15	log value from GEO, segmented by DNAcopy/cbs
GSM301480	GSE11931	GPL3441	19486517,16314836	-0.15	0.15	log value from GEO, segmented by DNAcopy/cbs
GSM301481	GSE11931	GPL3441	19486517,16314836	-0.15	0.15	log value from GEO, segmented by DNAcopy/cbs
GSM301482	GSE11931	GPL3441	19486517,16314836	-0.15	0.15	log value from GEO, segmented by DNAcopy/cbs
GSM301483	GSE11931	GPL3441	19486517,16314836	-0.15	0.15	log value from GEO, segmented by DNAcopy/cbs
GSM301484	GSE11931	GPL3441	19486517,16314836	-0.15	0.15	log value from GEO, segmented by DNAcopy/cbs
GSM301571	GSE11938	GPL4091	18973137	-0.15	0.15	log value from GEO, segmented by DNAcopy/cbs
GSM301572	GSE11938	GPL4091	18973137	-0.15	0.15	log value from GEO, segmented by DNAcopy/cbs
GSM301573	GSE11938	GPL4091	18973137	-0.15	0.15	log value from GEO, segmented by DNAcopy/cbs
GSM301574	GSE11938	GPL4091	18973137	-0.15	0.15	log value from GEO, segmented by DNAcopy/cbs
GSM301575	GSE11938	GPL4091	18973137	-0.15	0.15	log value from GEO, segmented by DNAcopy/cbs
GSM301576	GSE11938	GPL4091	18973137	-0.15	0.15	log value from GEO, segmented by DNAcopy/cbs
GSM301577	GSE11938	GPL4091	18973137	-0.15	0.15	log value from GEO, segmented by DNAcopy/cbs
GSM301578	GSE11938	GPL4091	18973137	-0.15	0.15	log value from GEO, segmented by DNAcopy/cbs
GSM301579	GSE11938	GPL4091	18973137	-0.15	0.15	log value from GEO, segmented by DNAcopy/cbs
GSM301580	GSE11938	GPL4091	18973137	-0.15	0.15	log value from GEO, segmented by DNAcopy/cbs
GSM302263	GSE11945	GPL2616	18632575	-0.15	0.15	log value from GEO, segmented by DNAcopy/cbs
GSM302264	GSE11945	GPL2616	18632575	-0.15	0.15	log value from GEO, segmented by DNAcopy/cbs
GSM302265	GSE11945	GPL2616	18632575	-0.15	0.15	log value from GEO, segmented by DNAcopy/cbs
GSM302266	GSE11945	GPL2616	18632575	-0.15	0.15	log value from GEO, segmented by DNAcopy/cbs
GSM302267	GSE11945	GPL2616	18632575	-0.15	0.15	log value from GEO, segmented by DNAcopy/cbs
GSM302268	GSE11945	GPL2616	18632575	-0.15	0.15	log value from GEO, segmented by DNAcopy/cbs
GSM302269	GSE11945	GPL2616	18632575	-0.15	0.15	log value from GEO, segmented by DNAcopy/cbs
GSM302270	GSE11945	GPL2616	18632575	-0.15	0.15	log value from GEO, segmented by DNAcopy/cbs
GSM302271	GSE11945	GPL2616	18632575	-0.15	0.15	log value from GEO, segmented by DNAcopy/cbs
GSM302272	GSE11945	GPL2616	18632575	-0.15	0.15	log value from GEO, segmented by DNAcopy/cbs
GSM302273	GSE11945	GPL2616	18632575	-0.15	0.15	log value from GEO, segmented by DNAcopy/cbs
GSM302274	GSE11945	GPL2616	18632575	-0.15	0.15	log value from GEO, segmented by DNAcopy/cbs
GSM302275	GSE11945	GPL2616	18632575	-0.15	0.15	log value from GEO, segmented by DNAcopy/cbs
GSM302276	GSE11945	GPL2616	18632575	-0.15	0.15	log value from GEO, segmented by DNAcopy/cbs
GSM302277	GSE11945	GPL2616	18632575	-0.15	0.15	log value from GEO, segmented by DNAcopy/cbs
GSM302280	GSE11945	GPL2616	18632575	-0.15	0.15	log value from GEO, segmented by DNAcopy/cbs
GSM302281	GSE11945	GPL2616	18632575	-0.15	0.15	log value from GEO, segmented by DNAcopy/cbs
GSM302282	GSE11945	GPL2616	18632575	-0.15	0.15	log value from GEO, segmented by DNAcopy/cbs
GSM302283	GSE11945	GPL2616	18632575	-0.15	0.15	log value from GEO, segmented by DNAcopy/cbs
GSM302284	GSE11945	GPL2616	18632575	-0.15	0.15	log value from GEO, segmented by DNAcopy/cbs
GSM302285	GSE11945	GPL2616	18632575	-0.15	0.15	log value from GEO, segmented by DNAcopy/cbs
GSM302286	GSE11945	GPL2616	18632575	-0.15	0.15	log value from GEO, segmented by DNAcopy/cbs
GSM302287	GSE11945	GPL2616	18632575	-0.15	0.15	log value from GEO, segmented by DNAcopy/cbs
GSM302288	GSE11945	GPL2616	18632575	-0.15	0.15	log value from GEO, segmented by DNAcopy/cbs
GSM302289	GSE11945	GPL2616	18632575	-0.15	0.15	log value from GEO, segmented by DNAcopy/cbs
GSM302290	GSE11945	GPL2616	18632575	-0.15	0.15	log value from GEO, segmented by DNAcopy/cbs
GSM302291	GSE11945	GPL2616	18632575	-0.15	0.15	log value from GEO, segmented by DNAcopy/cbs
GSM302292	GSE11945	GPL2616	18632575	-0.15	0.15	log value from GEO, segmented by DNAcopy/cbs
GSM302293	GSE11945	GPL2616	18632575	-0.15	0.15	log value from GEO, segmented by DNAcopy/cbs
GSM302883	GSE11976	GPL6986	18796136	-0.15	0.15	log value from GEO, segmented by DNAcopy/cbs
GSM302884	GSE11976	GPL6986	18796136	-0.15	0.15	log value from GEO, segmented by DNAcopy/cbs
GSM302885	GSE11976	GPL6986	18796136	-0.15	0.15	log value from GEO, segmented by DNAcopy/cbs
GSM302886	GSE11976	GPL6986	18796136	-0.15	0.15	log value from GEO, segmented by DNAcopy/cbs
GSM302887	GSE11976	GPL6986	18796136	-0.15	0.15	log value from GEO, segmented by DNAcopy/cbs
GSM302888	GSE11976	GPL6986	18796136	-0.15	0.15	log value from GEO, segmented by DNAcopy/cbs
GSM302889	GSE11976	GPL6986	18796136	-0.15	0.15	log value from GEO, segmented by DNAcopy/cbs
GSM302890	GSE11976	GPL6986	18796136	-0.15	0.15	log value from GEO, segmented by DNAcopy/cbs
GSM302891	GSE11976	GPL6986	18796136	-0.15	0.15	log value from GEO, segmented by DNAcopy/cbs
GSM302892	GSE11976	GPL6986	18796136	-0.15	0.15	log value from GEO, segmented by DNAcopy/cbs
GSM302893	GSE11976	GPL6986	18796136	-0.15	0.15	log value from GEO, segmented by DNAcopy/cbs
GSM302894	GSE11976	GPL6986	18796136	-0.15	0.15	log value from GEO, segmented by DNAcopy/cbs
GSM302906	GSE11976	GPL6986	18796136	-0.15	0.15	log value from GEO, segmented by DNAcopy/cbs
GSM302907	GSE11976	GPL6986	18796136	-0.15	0.15	log value from GEO, segmented by DNAcopy/cbs
GSM302908	GSE11976	GPL6986	18796136	-0.15	0.15	log value from GEO, segmented by DNAcopy/cbs
GSM302909	GSE11976	GPL6986	18796136	-0.15	0.15	log value from GEO, segmented by DNAcopy/cbs
GSM302910	GSE11976	GPL6986	18796136	-0.15	0.15	log value from GEO, segmented by DNAcopy/cbs
GSM302911	GSE11976	GPL6986	18796136	-0.15	0.15	log value from GEO, segmented by DNAcopy/cbs
GSM302912	GSE11976	GPL6986	18796136	-0.15	0.15	log value from GEO, segmented by DNAcopy/cbs
GSM302913	GSE11976	GPL6986	18796136	-0.15	0.15	log value from GEO, segmented by DNAcopy/cbs
GSM304288	GSE12040	GPL4896	17668415	-0.45	0.45	log value from GEO, segmented by DNAcopy/cbs
GSM304289	GSE12040	GPL4896	17668415	-0.45	0.45	log value from GEO, segmented by DNAcopy/cbs
GSM304290	GSE12040	GPL4896	17668415	-0.45	0.45	log value from GEO, segmented by DNAcopy/cbs
GSM304291	GSE12040	GPL4896	17668415	-0.45	0.45	log value from GEO, segmented by DNAcopy/cbs
GSM304292	GSE12040	GPL4896	17668415	-0.45	0.45	log value from GEO, segmented by DNAcopy/cbs
GSM304293	GSE12040	GPL4896	17668415	-0.45	0.45	log value from GEO, segmented by DNAcopy/cbs
GSM304294	GSE12040	GPL4896	17668415	-0.45	0.45	log value from GEO, segmented by DNAcopy/cbs
GSM304295	GSE12040	GPL4896	17668415	-0.45	0.45	log value from GEO, segmented by DNAcopy/cbs
GSM304296	GSE12040	GPL4896	17668415	-0.45	0.45	log value from GEO, segmented by DNAcopy/cbs
GSM304297	GSE12040	GPL4896	17668415	-0.45	0.45	log value from GEO, segmented by DNAcopy/cbs
GSM304298	GSE12040	GPL4896	17668415	-0.45	0.45	log value from GEO, segmented by DNAcopy/cbs
GSM304299	GSE12040	GPL4896	17668415	-0.45	0.45	log value from GEO, segmented by DNAcopy/cbs
GSM304300	GSE12040	GPL4896	17668415	-0.45	0.45	log value from GEO, segmented by DNAcopy/cbs
GSM304301	GSE12040	GPL4896	17668415	-0.45	0.45	log value from GEO, segmented by DNAcopy/cbs
GSM304302	GSE12040	GPL4896	17668415	-0.45	0.45	log value from GEO, segmented by DNAcopy/cbs
GSM307984	GSE12280	GPL7096	19324446	-0.3	0.3	log value from GEO, segmented by DNAcopy/cbs
GSM307995	GSE12280	GPL7096	19324446	-0.3	0.3	log value from GEO, segmented by DNAcopy/cbs
GSM308016	GSE12280	GPL7096	19324446	-0.3	0.3	log value from GEO, segmented by DNAcopy/cbs
GSM308021	GSE12280	GPL7096	19324446	-0.3	0.3	log value from GEO, segmented by DNAcopy/cbs
GSM308022	GSE12280	GPL7096	19324446	-0.3	0.3	log value from GEO, segmented by DNAcopy/cbs
GSM308023	GSE12280	GPL7096	19324446	-0.3	0.3	log value from GEO, segmented by DNAcopy/cbs
GSM308024	GSE12280	GPL7096	19324446	-0.3	0.3	log value from GEO, segmented by DNAcopy/cbs
GSM308026	GSE12280	GPL7096	19324446	-0.3	0.3	log value from GEO, segmented by DNAcopy/cbs
GSM308028	GSE12280	GPL7096	19324446	-0.3	0.3	log value from GEO, segmented by DNAcopy/cbs
GSM308029	GSE12280	GPL7096	19324446	-0.3	0.3	log value from GEO, segmented by DNAcopy/cbs
GSM308223	GSE12280	GPL7096	19324446	-0.3	0.3	log value from GEO, segmented by DNAcopy/cbs
GSM308236	GSE12280	GPL7096	19324446	-0.3	0.3	log value from GEO, segmented by DNAcopy/cbs
GSM308238	GSE12280	GPL7096	19324446	-0.3	0.3	log value from GEO, segmented by DNAcopy/cbs
GSM308240	GSE12280	GPL7096	19324446	-0.3	0.3	log value from GEO, segmented by DNAcopy/cbs
GSM308243	GSE12280	GPL7096	19324446	-0.3	0.3	log value from GEO, segmented by DNAcopy/cbs
GSM308248	GSE12280	GPL7096	19324446	-0.3	0.3	log value from GEO, segmented by DNAcopy/cbs
GSM308253	GSE12280	GPL7096	19324446	-0.3	0.3	log value from GEO, segmented by DNAcopy/cbs
GSM308464	GSE12280	GPL7096	19324446	-0.3	0.3	log value from GEO, segmented by DNAcopy/cbs
GSM308466	GSE12280	GPL7096	19324446	-0.3	0.3	log value from GEO, segmented by DNAcopy/cbs
GSM308468	GSE12280	GPL7096	19324446	-0.3	0.3	log value from GEO, segmented by DNAcopy/cbs
GSM308471	GSE12280	GPL7096	19324446	-0.3	0.3	log value from GEO, segmented by DNAcopy/cbs
GSM308472	GSE12280	GPL7096	19324446	-0.3	0.3	log value from GEO, segmented by DNAcopy/cbs
GSM308474	GSE12280	GPL7096	19324446	-0.3	0.3	log value from GEO, segmented by DNAcopy/cbs
GSM308475	GSE12280	GPL7096	19324446	-0.3	0.3	log value from GEO, segmented by DNAcopy/cbs
GSM308476	GSE12280	GPL7096	19324446	-0.3	0.3	log value from GEO, segmented by DNAcopy/cbs
GSM308477	GSE12280	GPL7096	19324446	-0.3	0.3	log value from GEO, segmented by DNAcopy/cbs
GSM308478	GSE12280	GPL7096	19324446	-0.3	0.3	log value from GEO, segmented by DNAcopy/cbs
GSM308479	GSE12280	GPL7096	19324446	-0.3	0.3	log value from GEO, segmented by DNAcopy/cbs
GSM308481	GSE12280	GPL7096	19324446	-0.3	0.3	log value from GEO, segmented by DNAcopy/cbs
GSM308484	GSE12280	GPL7096	19324446	-0.3	0.3	log value from GEO, segmented by DNAcopy/cbs
GSM308486	GSE12280	GPL7096	19324446	-0.3	0.3	log value from GEO, segmented by DNAcopy/cbs
GSM308489	GSE12280	GPL7096	19324446	-0.3	0.3	log value from GEO, segmented by DNAcopy/cbs
GSM308490	GSE12280	GPL7096	19324446	-0.3	0.3	log value from GEO, segmented by DNAcopy/cbs
GSM308491	GSE12280	GPL7096	19324446	-0.3	0.3	log value from GEO, segmented by DNAcopy/cbs
GSM311020	GSE12393	GPL2616	18703704	-0.15	0.15	log value from GEO, segmented by DNAcopy/cbs
GSM311021	GSE12393	GPL2616	18703704	-0.15	0.15	log value from GEO, segmented by DNAcopy/cbs
GSM311022	GSE12393	GPL2616	18703704	-0.15	0.15	log value from GEO, segmented by DNAcopy/cbs
GSM311023	GSE12393	GPL2616	18703704	-0.15	0.15	log value from GEO, segmented by DNAcopy/cbs
GSM311024	GSE12393	GPL2616	18703704	-0.15	0.15	log value from GEO, segmented by DNAcopy/cbs
GSM311025	GSE12393	GPL2616	18703704	-0.15	0.15	log value from GEO, segmented by DNAcopy/cbs
GSM311026	GSE12393	GPL2616	18703704	-0.15	0.15	log value from GEO, segmented by DNAcopy/cbs
GSM311027	GSE12393	GPL2616	18703704	-0.15	0.15	log value from GEO, segmented by DNAcopy/cbs
GSM311028	GSE12393	GPL2616	18703704	-0.15	0.15	log value from GEO, segmented by DNAcopy/cbs
GSM311029	GSE12393	GPL2616	18703704	-0.15	0.15	log value from GEO, segmented by DNAcopy/cbs
GSM311030	GSE12393	GPL2616	18703704	-0.15	0.15	log value from GEO, segmented by DNAcopy/cbs
GSM311031	GSE12393	GPL2616	18703704	-0.15	0.15	log value from GEO, segmented by DNAcopy/cbs
GSM311032	GSE12393	GPL2616	18703704	-0.15	0.15	log value from GEO, segmented by DNAcopy/cbs
GSM311033	GSE12393	GPL2616	18703704	-0.15	0.15	log value from GEO, segmented by DNAcopy/cbs
GSM311034	GSE12393	GPL2616	18703704	-0.15	0.15	log value from GEO, segmented by DNAcopy/cbs
GSM311035	GSE12393	GPL2616	18703704	-0.15	0.15	log value from GEO, segmented by DNAcopy/cbs
GSM311036	GSE12393	GPL2616	18703704	-0.15	0.15	log value from GEO, segmented by DNAcopy/cbs
GSM311037	GSE12393	GPL2616	18703704	-0.15	0.15	log value from GEO, segmented by DNAcopy/cbs
GSM311038	GSE12393	GPL2616	18703704	-0.15	0.15	log value from GEO, segmented by DNAcopy/cbs
GSM311039	GSE12393	GPL2616	18703704	-0.15	0.15	log value from GEO, segmented by DNAcopy/cbs
GSM311040	GSE12393	GPL2616	18703704	-0.15	0.15	log value from GEO, segmented by DNAcopy/cbs
GSM311041	GSE12393	GPL2616	18703704	-0.15	0.15	log value from GEO, segmented by DNAcopy/cbs
GSM311042	GSE12393	GPL2616	18703704	-0.15	0.15	log value from GEO, segmented by DNAcopy/cbs
GSM311043	GSE12393	GPL2616	18703704	-0.15	0.15	log value from GEO, segmented by DNAcopy/cbs
GSM311044	GSE12393	GPL2616	18703704	-0.15	0.15	log value from GEO, segmented by DNAcopy/cbs
GSM311045	GSE12393	GPL2616	18703704	-0.15	0.15	log value from GEO, segmented by DNAcopy/cbs
GSM311046	GSE12393	GPL2616	18703704	-0.15	0.15	log value from GEO, segmented by DNAcopy/cbs
GSM311047	GSE12393	GPL2616	18703704	-0.15	0.15	log value from GEO, segmented by DNAcopy/cbs
GSM311048	GSE12393	GPL2616	18703704	-0.15	0.15	log value from GEO, segmented by DNAcopy/cbs
GSM311049	GSE12393	GPL2616	18703704	-0.15	0.15	log value from GEO, segmented by DNAcopy/cbs
GSM311050	GSE12393	GPL2616	18703704	-0.15	0.15	log value from GEO, segmented by DNAcopy/cbs
GSM311051	GSE12393	GPL2616	18703704	-0.15	0.15	log value from GEO, segmented by DNAcopy/cbs
GSM311052	GSE12393	GPL2616	18703704	-0.15	0.15	log value from GEO, segmented by DNAcopy/cbs
GSM311053	GSE12393	GPL2616	18703704	-0.15	0.15	log value from GEO, segmented by DNAcopy/cbs
GSM311054	GSE12393	GPL2616	18703704	-0.15	0.15	log value from GEO, segmented by DNAcopy/cbs
GSM311055	GSE12393	GPL2616	18703704	-0.15	0.15	log value from GEO, segmented by DNAcopy/cbs
GSM311056	GSE12393	GPL2616	18703704	-0.15	0.15	log value from GEO, segmented by DNAcopy/cbs
GSM311057	GSE12393	GPL2616	18703704	-0.15	0.15	log value from GEO, segmented by DNAcopy/cbs
GSM311058	GSE12393	GPL2616	18703704	-0.15	0.15	log value from GEO, segmented by DNAcopy/cbs
GSM311059	GSE12393	GPL2616	18703704	-0.15	0.15	log value from GEO, segmented by DNAcopy/cbs
GSM311060	GSE12393	GPL2616	18703704	-0.15	0.15	log value from GEO, segmented by DNAcopy/cbs
GSM311061	GSE12393	GPL2616	18703704	-0.15	0.15	log value from GEO, segmented by DNAcopy/cbs
GSM311062	GSE12393	GPL2616	18703704	-0.15	0.15	log value from GEO, segmented by DNAcopy/cbs
GSM311063	GSE12393	GPL2616	18703704	-0.15	0.15	log value from GEO, segmented by DNAcopy/cbs
GSM311064	GSE12393	GPL2616	18703704	-0.15	0.15	log value from GEO, segmented by DNAcopy/cbs
GSM311065	GSE12393	GPL2616	18703704	-0.15	0.15	log value from GEO, segmented by DNAcopy/cbs
GSM311066	GSE12393	GPL2616	18703704	-0.15	0.15	log value from GEO, segmented by DNAcopy/cbs
GSM311067	GSE12393	GPL2616	18703704	-0.15	0.15	log value from GEO, segmented by DNAcopy/cbs
GSM311068	GSE12393	GPL2616	18703704	-0.15	0.15	log value from GEO, segmented by DNAcopy/cbs
GSM311069	GSE12393	GPL2616	18703704	-0.15	0.15	log value from GEO, segmented by DNAcopy/cbs
GSM311070	GSE12393	GPL2616	18703704	-0.15	0.15	log value from GEO, segmented by DNAcopy/cbs
GSM311071	GSE12393	GPL2616	18703704	-0.15	0.15	log value from GEO, segmented by DNAcopy/cbs
GSM311072	GSE12393	GPL2616	18703704	-0.15	0.15	log value from GEO, segmented by DNAcopy/cbs
GSM311073	GSE12393	GPL2616	18703704	-0.15	0.15	log value from GEO, segmented by DNAcopy/cbs
GSM311074	GSE12393	GPL2616	18703704	-0.15	0.15	log value from GEO, segmented by DNAcopy/cbs
GSM311075	GSE12393	GPL2616	18703704	-0.15	0.15	log value from GEO, segmented by DNAcopy/cbs
GSM311076	GSE12393	GPL2616	18703704	-0.15	0.15	log value from GEO, segmented by DNAcopy/cbs
GSM311077	GSE12393	GPL2616	18703704	-0.15	0.15	log value from GEO, segmented by DNAcopy/cbs
GSM311078	GSE12393	GPL2616	18703704	-0.15	0.15	log value from GEO, segmented by DNAcopy/cbs
GSM311079	GSE12393	GPL2616	18703704	-0.15	0.15	log value from GEO, segmented by DNAcopy/cbs
GSM311080	GSE12393	GPL2616	18703704	-0.15	0.15	log value from GEO, segmented by DNAcopy/cbs
GSM311081	GSE12393	GPL2616	18703704	-0.15	0.15	log value from GEO, segmented by DNAcopy/cbs
GSM311082	GSE12393	GPL2616	18703704	-0.15	0.15	log value from GEO, segmented by DNAcopy/cbs
GSM311083	GSE12393	GPL2616	18703704	-0.15	0.15	log value from GEO, segmented by DNAcopy/cbs
GSM311084	GSE12393	GPL2616	18703704	-0.15	0.15	log value from GEO, segmented by DNAcopy/cbs
GSM311085	GSE12393	GPL2616	18703704	-0.15	0.15	log value from GEO, segmented by DNAcopy/cbs
GSM311086	GSE12393	GPL2616	18703704	-0.15	0.15	log value from GEO, segmented by DNAcopy/cbs
GSM311087	GSE12393	GPL2616	18703704	-0.15	0.15	log value from GEO, segmented by DNAcopy/cbs
GSM311088	GSE12393	GPL2616	18703704	-0.15	0.15	log value from GEO, segmented by DNAcopy/cbs
GSM311089	GSE12393	GPL2616	18703704	-0.15	0.15	log value from GEO, segmented by DNAcopy/cbs
GSM311090	GSE12393	GPL2616	18703704	-0.15	0.15	log value from GEO, segmented by DNAcopy/cbs
GSM311091	GSE12393	GPL2616	18703704	-0.15	0.15	log value from GEO, segmented by DNAcopy/cbs
GSM311092	GSE12393	GPL2616	18703704	-0.15	0.15	log value from GEO, segmented by DNAcopy/cbs
GSM311093	GSE12393	GPL2616	18703704	-0.15	0.15	log value from GEO, segmented by DNAcopy/cbs
GSM311094	GSE12393	GPL2616	18703704	-0.15	0.15	log value from GEO, segmented by DNAcopy/cbs
GSM311095	GSE12393	GPL2616	18703704	-0.15	0.15	log value from GEO, segmented by DNAcopy/cbs
GSM311096	GSE12393	GPL2616	18703704	-0.15	0.15	log value from GEO, segmented by DNAcopy/cbs
GSM311097	GSE12393	GPL2616	18703704	-0.15	0.15	log value from GEO, segmented by DNAcopy/cbs
GSM311098	GSE12393	GPL2616	18703704	-0.15	0.15	log value from GEO, segmented by DNAcopy/cbs
GSM311099	GSE12393	GPL2616	18703704	-0.15	0.15	log value from GEO, segmented by DNAcopy/cbs
GSM311100	GSE12393	GPL2616	18703704	-0.15	0.15	log value from GEO, segmented by DNAcopy/cbs
GSM311101	GSE12393	GPL2616	18703704	-0.15	0.15	log value from GEO, segmented by DNAcopy/cbs
GSM311102	GSE12393	GPL2616	18703704	-0.15	0.15	log value from GEO, segmented by DNAcopy/cbs
GSM311103	GSE12393	GPL2616	18703704	-0.15	0.15	log value from GEO, segmented by DNAcopy/cbs
GSM311104	GSE12393	GPL2616	18703704	-0.15	0.15	log value from GEO, segmented by DNAcopy/cbs
GSM311105	GSE12393	GPL2616	18703704	-0.15	0.15	log value from GEO, segmented by DNAcopy/cbs
GSM311106	GSE12393	GPL2616	18703704	-0.15	0.15	log value from GEO, segmented by DNAcopy/cbs
GSM311107	GSE12393	GPL2616	18703704	-0.15	0.15	log value from GEO, segmented by DNAcopy/cbs
GSM311108	GSE12393	GPL2616	18703704	-0.15	0.15	log value from GEO, segmented by DNAcopy/cbs
GSM311109	GSE12393	GPL2616	18703704	-0.15	0.15	log value from GEO, segmented by DNAcopy/cbs
GSM311110	GSE12393	GPL2616	18703704	-0.15	0.15	log value from GEO, segmented by DNAcopy/cbs
GSM311111	GSE12393	GPL2616	18703704	-0.15	0.15	log value from GEO, segmented by DNAcopy/cbs
GSM311112	GSE12393	GPL2616	18703704	-0.15	0.15	log value from GEO, segmented by DNAcopy/cbs
GSM311113	GSE12393	GPL2616	18703704	-0.15	0.15	log value from GEO, segmented by DNAcopy/cbs
GSM311114	GSE12393	GPL2616	18703704	-0.15	0.15	log value from GEO, segmented by DNAcopy/cbs
GSM311115	GSE12393	GPL2616	18703704	-0.15	0.15	log value from GEO, segmented by DNAcopy/cbs
GSM311116	GSE12393	GPL2616	18703704	-0.15	0.15	log value from GEO, segmented by DNAcopy/cbs
GSM311117	GSE12393	GPL2616	18703704	-0.15	0.15	log value from GEO, segmented by DNAcopy/cbs
GSM311118	GSE12393	GPL2616	18703704	-0.15	0.15	log value from GEO, segmented by DNAcopy/cbs
GSM311119	GSE12393	GPL2616	18703704	-0.15	0.15	log value from GEO, segmented by DNAcopy/cbs
GSM311120	GSE12393	GPL2616	18703704	-0.15	0.15	log value from GEO, segmented by DNAcopy/cbs
GSM311121	GSE12393	GPL2616	18703704	-0.15	0.15	log value from GEO, segmented by DNAcopy/cbs
GSM311122	GSE12393	GPL2616	18703704	-0.15	0.15	log value from GEO, segmented by DNAcopy/cbs
GSM311123	GSE12393	GPL2616	18703704	-0.15	0.15	log value from GEO, segmented by DNAcopy/cbs
GSM311124	GSE12393	GPL2616	18703704	-0.15	0.15	log value from GEO, segmented by DNAcopy/cbs
GSM311125	GSE12393	GPL2616	18703704	-0.15	0.15	log value from GEO, segmented by DNAcopy/cbs
GSM312343	GSE12439	GPL4723	19336518	-0.25	0.25	log value from GEO, segmented by DNAcopy/cbs
GSM312344	GSE12439	GPL4723	19336518	-0.25	0.25	log value from GEO, segmented by DNAcopy/cbs
GSM312345	GSE12439	GPL4723	19336518	-0.25	0.25	log value from GEO, segmented by DNAcopy/cbs
GSM312346	GSE12439	GPL4723	19336518	-0.25	0.25	log value from GEO, segmented by DNAcopy/cbs
GSM312347	GSE12439	GPL4723	19336518	-0.25	0.25	log value from GEO, segmented by DNAcopy/cbs
GSM312348	GSE12439	GPL4723	19336518	-0.25	0.25	log value from GEO, segmented by DNAcopy/cbs
GSM312349	GSE12439	GPL4723	19336518	-0.25	0.25	log value from GEO, segmented by DNAcopy/cbs
GSM312350	GSE12439	GPL4723	19336518	-0.25	0.25	log value from GEO, segmented by DNAcopy/cbs
GSM312351	GSE12439	GPL4723	19336518	-0.25	0.25	log value from GEO, segmented by DNAcopy/cbs
GSM312352	GSE12439	GPL4723	19336518	-0.25	0.25	log value from GEO, segmented by DNAcopy/cbs
GSM312353	GSE12439	GPL4723	19336518	-0.25	0.25	log value from GEO, segmented by DNAcopy/cbs
GSM312354	GSE12439	GPL4723	19336518	-0.25	0.25	log value from GEO, segmented by DNAcopy/cbs
GSM312355	GSE12439	GPL4723	19336518	-0.25	0.25	log value from GEO, segmented by DNAcopy/cbs
GSM312356	GSE12439	GPL4723	19336518	-0.25	0.25	log value from GEO, segmented by DNAcopy/cbs
GSM312357	GSE12439	GPL4723	19336518	-0.25	0.25	log value from GEO, segmented by DNAcopy/cbs
GSM312358	GSE12439	GPL4723	19336518	-0.25	0.25	log value from GEO, segmented by DNAcopy/cbs
GSM312359	GSE12439	GPL4723	19336518	-0.25	0.25	log value from GEO, segmented by DNAcopy/cbs
GSM312360	GSE12439	GPL4723	19336518	-0.25	0.25	log value from GEO, segmented by DNAcopy/cbs
GSM312361	GSE12439	GPL4723	19336518	-0.25	0.25	log value from GEO, segmented by DNAcopy/cbs
GSM312362	GSE12439	GPL4723	19336518	-0.25	0.25	log value from GEO, segmented by DNAcopy/cbs
GSM312363	GSE12439	GPL4723	19336518	-0.25	0.25	log value from GEO, segmented by DNAcopy/cbs
GSM312364	GSE12439	GPL4723	19336518	-0.25	0.25	log value from GEO, segmented by DNAcopy/cbs
GSM312365	GSE12439	GPL4723	19336518	-0.25	0.25	log value from GEO, segmented by DNAcopy/cbs
GSM312366	GSE12439	GPL4723	19336518	-0.25	0.25	log value from GEO, segmented by DNAcopy/cbs
GSM312367	GSE12439	GPL4723	19336518	-0.25	0.25	log value from GEO, segmented by DNAcopy/cbs
GSM312368	GSE12439	GPL4723	19336518	-0.25	0.25	log value from GEO, segmented by DNAcopy/cbs
GSM312369	GSE12439	GPL4723	19336518	-0.25	0.25	log value from GEO, segmented by DNAcopy/cbs
GSM312370	GSE12439	GPL4723	19336518	-0.25	0.25	log value from GEO, segmented by DNAcopy/cbs
GSM312371	GSE12439	GPL4723	19336518	-0.25	0.25	log value from GEO, segmented by DNAcopy/cbs
GSM312372	GSE12439	GPL4723	19336518	-0.25	0.25	log value from GEO, segmented by DNAcopy/cbs
GSM312373	GSE12439	GPL4723	19336518	-0.25	0.25	log value from GEO, segmented by DNAcopy/cbs
GSM312374	GSE12439	GPL4723	19336518	-0.25	0.25	log value from GEO, segmented by DNAcopy/cbs
GSM312375	GSE12439	GPL4723	19336518	-0.25	0.25	log value from GEO, segmented by DNAcopy/cbs
GSM312376	GSE12439	GPL4723	19336518	-0.25	0.25	log value from GEO, segmented by DNAcopy/cbs
GSM312377	GSE12439	GPL4723	19336518	-0.25	0.25	log value from GEO, segmented by DNAcopy/cbs
GSM312378	GSE12439	GPL4723	19336518	-0.25	0.25	log value from GEO, segmented by DNAcopy/cbs
GSM312379	GSE12439	GPL4723	19336518	-0.25	0.25	log value from GEO, segmented by DNAcopy/cbs
GSM312380	GSE12439	GPL4723	19336518	-0.25	0.25	log value from GEO, segmented by DNAcopy/cbs
GSM312381	GSE12439	GPL4723	19336518	-0.25	0.25	log value from GEO, segmented by DNAcopy/cbs
GSM312382	GSE12439	GPL4723	19336518	-0.25	0.25	log value from GEO, segmented by DNAcopy/cbs
GSM312383	GSE12439	GPL4723	19336518	-0.25	0.25	log value from GEO, segmented by DNAcopy/cbs
GSM312384	GSE12439	GPL4723	19336518	-0.25	0.25	log value from GEO, segmented by DNAcopy/cbs
GSM312385	GSE12439	GPL4723	19336518	-0.25	0.25	log value from GEO, segmented by DNAcopy/cbs
GSM312386	GSE12439	GPL4723	19336518	-0.25	0.25	log value from GEO, segmented by DNAcopy/cbs
GSM312387	GSE12439	GPL4723	19336518	-0.25	0.25	log value from GEO, segmented by DNAcopy/cbs
GSM312388	GSE12439	GPL4723	19336518	-0.25	0.25	log value from GEO, segmented by DNAcopy/cbs
GSM312389	GSE12439	GPL4723	19336518	-0.25	0.25	log value from GEO, segmented by DNAcopy/cbs
GSM312390	GSE12439	GPL4723	19336518	-0.25	0.25	log value from GEO, segmented by DNAcopy/cbs
GSM312391	GSE12439	GPL4723	19336518	-0.25	0.25	log value from GEO, segmented by DNAcopy/cbs
GSM312392	GSE12439	GPL4723	19336518	-0.25	0.25	log value from GEO, segmented by DNAcopy/cbs
GSM312393	GSE12439	GPL4723	19336518	-0.25	0.25	log value from GEO, segmented by DNAcopy/cbs
GSM312394	GSE12439	GPL4723	19336518	-0.25	0.25	log value from GEO, segmented by DNAcopy/cbs
GSM312395	GSE12439	GPL4723	19336518	-0.25	0.25	log value from GEO, segmented by DNAcopy/cbs
GSM312396	GSE12439	GPL4723	19336518	-0.25	0.25	log value from GEO, segmented by DNAcopy/cbs
GSM312397	GSE12439	GPL4723	19336518	-0.25	0.25	log value from GEO, segmented by DNAcopy/cbs
GSM312398	GSE12439	GPL4723	19336518	-0.25	0.25	log value from GEO, segmented by DNAcopy/cbs
GSM312399	GSE12439	GPL4723	19336518	-0.25	0.25	log value from GEO, segmented by DNAcopy/cbs
GSM312400	GSE12439	GPL4723	19336518	-0.25	0.25	log value from GEO, segmented by DNAcopy/cbs
GSM312401	GSE12439	GPL4723	19336518	-0.25	0.25	log value from GEO, segmented by DNAcopy/cbs
GSM312402	GSE12439	GPL4723	19336518	-0.25	0.25	log value from GEO, segmented by DNAcopy/cbs
GSM312403	GSE12439	GPL4723	19336518	-0.25	0.25	log value from GEO, segmented by DNAcopy/cbs
GSM312404	GSE12439	GPL4723	19336518	-0.25	0.25	log value from GEO, segmented by DNAcopy/cbs
GSM315235	GSE12439	GPL7203	19336518	-0.25	0.25	log value from GEO, segmented by DNAcopy/cbs
GSM315236	GSE12439	GPL7203	19336518	-0.25	0.25	log value from GEO, segmented by DNAcopy/cbs
GSM315237	GSE12439	GPL7203	19336518	-0.25	0.25	log value from GEO, segmented by DNAcopy/cbs
GSM315238	GSE12439	GPL7203	19336518	-0.25	0.25	log value from GEO, segmented by DNAcopy/cbs
GSM315239	GSE12439	GPL7203	19336518	-0.25	0.25	log value from GEO, segmented by DNAcopy/cbs
GSM314560	GSE12520	GPL7199	19911421	-0.15	0.15	log value from GEO, segmented by DNAcopy/cbs
GSM314561	GSE12520	GPL7199	19911421	-0.15	0.15	log value from GEO, segmented by DNAcopy/cbs
GSM314562	GSE12520	GPL7199	19911421	-0.15	0.15	log value from GEO, segmented by DNAcopy/cbs
GSM314563	GSE12520	GPL7199	19911421	-0.15	0.15	log value from GEO, segmented by DNAcopy/cbs
GSM314564	GSE12520	GPL7199	19911421	-0.15	0.15	log value from GEO, segmented by DNAcopy/cbs
GSM314565	GSE12520	GPL7199	19911421	-0.15	0.15	log value from GEO, segmented by DNAcopy/cbs
GSM314566	GSE12520	GPL7199	19911421	-0.15	0.15	log value from GEO, segmented by DNAcopy/cbs
GSM314567	GSE12520	GPL7199	19911421	-0.15	0.15	log value from GEO, segmented by DNAcopy/cbs
GSM314568	GSE12520	GPL7199	19911421	-0.15	0.15	log value from GEO, segmented by DNAcopy/cbs
GSM314569	GSE12520	GPL7199	19911421	-0.15	0.15	log value from GEO, segmented by DNAcopy/cbs
GSM314570	GSE12520	GPL7199	19911421	-0.15	0.15	log value from GEO, segmented by DNAcopy/cbs
GSM314571	GSE12520	GPL7199	19911421	-0.15	0.15	log value from GEO, segmented by DNAcopy/cbs
GSM314572	GSE12520	GPL7199	19911421	-0.15	0.15	log value from GEO, segmented by DNAcopy/cbs
GSM314573	GSE12520	GPL7199	19911421	-0.15	0.15	log value from GEO, segmented by DNAcopy/cbs
GSM314574	GSE12520	GPL7199	19911421	-0.15	0.15	log value from GEO, segmented by DNAcopy/cbs
GSM314575	GSE12520	GPL7199	19911421	-0.15	0.15	log value from GEO, segmented by DNAcopy/cbs
GSM314576	GSE12520	GPL7199	19911421	-0.15	0.15	log value from GEO, segmented by DNAcopy/cbs
GSM314577	GSE12520	GPL7199	19911421	-0.15	0.15	log value from GEO, segmented by DNAcopy/cbs
GSM314578	GSE12520	GPL7199	19911421	-0.15	0.15	log value from GEO, segmented by DNAcopy/cbs
GSM314579	GSE12520	GPL7199	19911421	-0.15	0.15	log value from GEO, segmented by DNAcopy/cbs
GSM314580	GSE12520	GPL7199	19911421	-0.15	0.15	log value from GEO, segmented by DNAcopy/cbs
GSM314581	GSE12520	GPL7199	19911421	-0.15	0.15	log value from GEO, segmented by DNAcopy/cbs
GSM314582	GSE12520	GPL7199	19911421	-0.15	0.15	log value from GEO, segmented by DNAcopy/cbs
GSM314583	GSE12520	GPL7199	19911421	-0.15	0.15	log value from GEO, segmented by DNAcopy/cbs
GSM314584	GSE12520	GPL7199	19911421	-0.15	0.15	log value from GEO, segmented by DNAcopy/cbs
GSM314585	GSE12520	GPL7199	19911421	-0.15	0.15	log value from GEO, segmented by DNAcopy/cbs
GSM314586	GSE12520	GPL7199	19911421	-0.15	0.15	log value from GEO, segmented by DNAcopy/cbs
GSM314587	GSE12520	GPL7199	19911421	-0.15	0.15	log value from GEO, segmented by DNAcopy/cbs
GSM314588	GSE12520	GPL7199	19911421	-0.15	0.15	log value from GEO, segmented by DNAcopy/cbs
GSM314589	GSE12520	GPL7199	19911421	-0.15	0.15	log value from GEO, segmented by DNAcopy/cbs
GSM314590	GSE12520	GPL7199	19911421	-0.15	0.15	log value from GEO, segmented by DNAcopy/cbs
GSM314591	GSE12520	GPL7199	19911421	-0.15	0.15	log value from GEO, segmented by DNAcopy/cbs
GSM314592	GSE12520	GPL7199	19911421	-0.15	0.15	log value from GEO, segmented by DNAcopy/cbs
GSM314593	GSE12520	GPL7199	19911421	-0.15	0.15	log value from GEO, segmented by DNAcopy/cbs
GSM314594	GSE12520	GPL7199	19911421	-0.15	0.15	log value from GEO, segmented by DNAcopy/cbs
GSM314595	GSE12520	GPL7199	19911421	-0.15	0.15	log value from GEO, segmented by DNAcopy/cbs
GSM314596	GSE12520	GPL7199	19911421	-0.15	0.15	log value from GEO, segmented by DNAcopy/cbs
GSM314597	GSE12520	GPL7199	19911421	-0.15	0.15	log value from GEO, segmented by DNAcopy/cbs
GSM314598	GSE12520	GPL7199	19911421	-0.15	0.15	log value from GEO, segmented by DNAcopy/cbs
GSM314599	GSE12520	GPL7199	19911421	-0.15	0.15	log value from GEO, segmented by DNAcopy/cbs
GSM314600	GSE12520	GPL7199	19911421	-0.15	0.15	log value from GEO, segmented by DNAcopy/cbs
GSM314601	GSE12520	GPL7199	19911421	-0.15	0.15	log value from GEO, segmented by DNAcopy/cbs
GSM314602	GSE12520	GPL7199	19911421	-0.15	0.15	log value from GEO, segmented by DNAcopy/cbs
GSM314603	GSE12520	GPL7199	19911421	-0.15	0.15	log value from GEO, segmented by DNAcopy/cbs
GSM314604	GSE12520	GPL7199	19911421	-0.15	0.15	log value from GEO, segmented by DNAcopy/cbs
GSM314605	GSE12520	GPL7199	19911421	-0.15	0.15	log value from GEO, segmented by DNAcopy/cbs
GSM314606	GSE12520	GPL7199	19911421	-0.15	0.15	log value from GEO, segmented by DNAcopy/cbs
GSM314607	GSE12520	GPL7199	19911421	-0.15	0.15	log value from GEO, segmented by DNAcopy/cbs
GSM314608	GSE12520	GPL7199	19911421	-0.15	0.15	log value from GEO, segmented by DNAcopy/cbs
GSM314609	GSE12520	GPL7199	19911421	-0.15	0.15	log value from GEO, segmented by DNAcopy/cbs
GSM314610	GSE12520	GPL7199	19911421	-0.15	0.15	log value from GEO, segmented by DNAcopy/cbs
GSM314611	GSE12520	GPL7199	19911421	-0.15	0.15	log value from GEO, segmented by DNAcopy/cbs
GSM314612	GSE12520	GPL7199	19911421	-0.15	0.15	log value from GEO, segmented by DNAcopy/cbs
GSM314613	GSE12520	GPL7199	19911421	-0.15	0.15	log value from GEO, segmented by DNAcopy/cbs
GSM314614	GSE12520	GPL7199	19911421	-0.15	0.15	log value from GEO, segmented by DNAcopy/cbs
GSM314615	GSE12520	GPL7199	19911421	-0.15	0.15	log value from GEO, segmented by DNAcopy/cbs
GSM314616	GSE12520	GPL7199	19911421	-0.15	0.15	log value from GEO, segmented by DNAcopy/cbs
GSM314617	GSE12520	GPL7199	19911421	-0.15	0.15	log value from GEO, segmented by DNAcopy/cbs
GSM314618	GSE12520	GPL7199	19911421	-0.15	0.15	log value from GEO, segmented by DNAcopy/cbs
GSM314619	GSE12520	GPL7199	19911421	-0.15	0.15	log value from GEO, segmented by DNAcopy/cbs
GSM314620	GSE12520	GPL7199	19911421	-0.15	0.15	log value from GEO, segmented by DNAcopy/cbs
GSM314621	GSE12520	GPL7199	19911421	-0.15	0.15	log value from GEO, segmented by DNAcopy/cbs
GSM314622	GSE12520	GPL7199	19911421	-0.15	0.15	log value from GEO, segmented by DNAcopy/cbs
GSM314623	GSE12520	GPL7199	19911421	-0.15	0.15	log value from GEO, segmented by DNAcopy/cbs
GSM314624	GSE12520	GPL7199	19911421	-0.15	0.15	log value from GEO, segmented by DNAcopy/cbs
GSM314625	GSE12520	GPL7199	19911421	-0.15	0.15	log value from GEO, segmented by DNAcopy/cbs
GSM314626	GSE12520	GPL7199	19911421	-0.15	0.15	log value from GEO, segmented by DNAcopy/cbs
GSM314627	GSE12520	GPL7199	19911421	-0.15	0.15	log value from GEO, segmented by DNAcopy/cbs
GSM314628	GSE12520	GPL7199	19911421	-0.15	0.15	log value from GEO, segmented by DNAcopy/cbs
GSM314629	GSE12520	GPL7199	19911421	-0.15	0.15	log value from GEO, segmented by DNAcopy/cbs
GSM314630	GSE12520	GPL7199	19911421	-0.15	0.15	log value from GEO, segmented by DNAcopy/cbs
GSM314631	GSE12520	GPL7199	19911421	-0.15	0.15	log value from GEO, segmented by DNAcopy/cbs
GSM314632	GSE12520	GPL7199	19911421	-0.15	0.15	log value from GEO, segmented by DNAcopy/cbs
GSM314633	GSE12520	GPL7199	19911421	-0.15	0.15	log value from GEO, segmented by DNAcopy/cbs
GSM314634	GSE12520	GPL7199	19911421	-0.15	0.15	log value from GEO, segmented by DNAcopy/cbs
GSM314635	GSE12520	GPL7199	19911421	-0.15	0.15	log value from GEO, segmented by DNAcopy/cbs
GSM314636	GSE12520	GPL7199	19911421	-0.15	0.15	log value from GEO, segmented by DNAcopy/cbs
GSM314637	GSE12520	GPL7199	19911421	-0.15	0.15	log value from GEO, segmented by DNAcopy/cbs
GSM314638	GSE12520	GPL7199	19911421	-0.15	0.15	log value from GEO, segmented by DNAcopy/cbs
GSM314639	GSE12520	GPL7199	19911421	-0.15	0.15	log value from GEO, segmented by DNAcopy/cbs
GSM314640	GSE12520	GPL7199	19911421	-0.15	0.15	log value from GEO, segmented by DNAcopy/cbs
GSM314641	GSE12520	GPL7199	19911421	-0.15	0.15	log value from GEO, segmented by DNAcopy/cbs
GSM314642	GSE12520	GPL7199	19911421	-0.15	0.15	log value from GEO, segmented by DNAcopy/cbs
GSM314643	GSE12520	GPL7199	19911421	-0.15	0.15	log value from GEO, segmented by DNAcopy/cbs
GSM314644	GSE12520	GPL7199	19911421	-0.15	0.15	log value from GEO, segmented by DNAcopy/cbs
GSM314645	GSE12520	GPL7199	19911421	-0.15	0.15	log value from GEO, segmented by DNAcopy/cbs
GSM314646	GSE12520	GPL7199	19911421	-0.15	0.15	log value from GEO, segmented by DNAcopy/cbs
GSM314647	GSE12520	GPL7199	19911421	-0.15	0.15	log value from GEO, segmented by DNAcopy/cbs
GSM314648	GSE12520	GPL7199	19911421	-0.15	0.15	log value from GEO, segmented by DNAcopy/cbs
GSM314649	GSE12520	GPL7199	19911421	-0.15	0.15	log value from GEO, segmented by DNAcopy/cbs
GSM314650	GSE12520	GPL7199	19911421	-0.15	0.15	log value from GEO, segmented by DNAcopy/cbs
GSM314651	GSE12520	GPL7199	19911421	-0.15	0.15	log value from GEO, segmented by DNAcopy/cbs
GSM314652	GSE12520	GPL7199	19911421	-0.15	0.15	log value from GEO, segmented by DNAcopy/cbs
GSM314653	GSE12520	GPL7199	19911421	-0.15	0.15	log value from GEO, segmented by DNAcopy/cbs
GSM314654	GSE12520	GPL7199	19911421	-0.15	0.15	log value from GEO, segmented by DNAcopy/cbs
GSM314655	GSE12520	GPL7199	19911421	-0.15	0.15	log value from GEO, segmented by DNAcopy/cbs
GSM314656	GSE12520	GPL7199	19911421	-0.15	0.15	log value from GEO, segmented by DNAcopy/cbs
GSM314657	GSE12520	GPL7199	19911421	-0.15	0.15	log value from GEO, segmented by DNAcopy/cbs
GSM314658	GSE12520	GPL7199	19911421	-0.15	0.15	log value from GEO, segmented by DNAcopy/cbs
GSM314659	GSE12520	GPL7199	19911421	-0.15	0.15	log value from GEO, segmented by DNAcopy/cbs
GSM314660	GSE12520	GPL7199	19911421	-0.15	0.15	log value from GEO, segmented by DNAcopy/cbs
GSM314661	GSE12520	GPL7199	19911421	-0.15	0.15	log value from GEO, segmented by DNAcopy/cbs
GSM314662	GSE12520	GPL7199	19911421	-0.15	0.15	log value from GEO, segmented by DNAcopy/cbs
GSM314663	GSE12520	GPL7199	19911421	-0.15	0.15	log value from GEO, segmented by DNAcopy/cbs
GSM314664	GSE12520	GPL7199	19911421	-0.15	0.15	log value from GEO, segmented by DNAcopy/cbs
GSM314665	GSE12520	GPL7199	19911421	-0.15	0.15	log value from GEO, segmented by DNAcopy/cbs
GSM314666	GSE12520	GPL7199	19911421	-0.15	0.15	log value from GEO, segmented by DNAcopy/cbs
GSM314667	GSE12520	GPL7199	19911421	-0.15	0.15	log value from GEO, segmented by DNAcopy/cbs
GSM314668	GSE12520	GPL7199	19911421	-0.15	0.15	log value from GEO, segmented by DNAcopy/cbs
GSM458282	GSE12520	GPL9336	19911421	-0.15	0.15	log value from GEO, segmented by DNAcopy/cbs
GSM458283	GSE12520	GPL9336	19911421	-0.15	0.15	log value from GEO, segmented by DNAcopy/cbs
GSM458284	GSE12520	GPL9336	19911421	-0.15	0.15	log value from GEO, segmented by DNAcopy/cbs
GSM458285	GSE12520	GPL9336	19911421	-0.15	0.15	log value from GEO, segmented by DNAcopy/cbs
GSM458286	GSE12520	GPL9336	19911421	-0.15	0.15	log value from GEO, segmented by DNAcopy/cbs
GSM458287	GSE12520	GPL9336	19911421	-0.15	0.15	log value from GEO, segmented by DNAcopy/cbs
GSM458288	GSE12520	GPL9336	19911421	-0.15	0.15	log value from GEO, segmented by DNAcopy/cbs
GSM458289	GSE12520	GPL9336	19911421	-0.15	0.15	log value from GEO, segmented by DNAcopy/cbs
GSM458290	GSE12520	GPL9336	19911421	-0.15	0.15	log value from GEO, segmented by DNAcopy/cbs
GSM458291	GSE12520	GPL9336	19911421	-0.15	0.15	log value from GEO, segmented by DNAcopy/cbs
GSM458292	GSE12520	GPL9336	19911421	-0.15	0.15	log value from GEO, segmented by DNAcopy/cbs
GSM458293	GSE12520	GPL9336	19911421	-0.15	0.15	log value from GEO, segmented by DNAcopy/cbs
GSM458294	GSE12520	GPL9336	19911421	-0.15	0.15	log value from GEO, segmented by DNAcopy/cbs
GSM458295	GSE12520	GPL9336	19911421	-0.15	0.15	log value from GEO, segmented by DNAcopy/cbs
GSM458296	GSE12520	GPL9336	19911421	-0.15	0.15	log value from GEO, segmented by DNAcopy/cbs
GSM458297	GSE12520	GPL9336	19911421	-0.15	0.15	log value from GEO, segmented by DNAcopy/cbs
GSM458298	GSE12520	GPL9336	19911421	-0.15	0.15	log value from GEO, segmented by DNAcopy/cbs
GSM458299	GSE12520	GPL9336	19911421	-0.15	0.15	log value from GEO, segmented by DNAcopy/cbs
GSM458300	GSE12520	GPL9336	19911421	-0.15	0.15	log value from GEO, segmented by DNAcopy/cbs
GSM458301	GSE12520	GPL9336	19911421	-0.15	0.15	log value from GEO, segmented by DNAcopy/cbs
GSM458302	GSE12520	GPL9336	19911421	-0.15	0.15	log value from GEO, segmented by DNAcopy/cbs
GSM458303	GSE12520	GPL9336	19911421	-0.15	0.15	log value from GEO, segmented by DNAcopy/cbs
GSM458304	GSE12520	GPL9336	19911421	-0.15	0.15	log value from GEO, segmented by DNAcopy/cbs
GSM458305	GSE12520	GPL9336	19911421	-0.15	0.15	log value from GEO, segmented by DNAcopy/cbs
GSM458306	GSE12520	GPL9336	19911421	-0.15	0.15	log value from GEO, segmented by DNAcopy/cbs
GSM458307	GSE12520	GPL9336	19911421	-0.15	0.15	log value from GEO, segmented by DNAcopy/cbs
GSM458308	GSE12520	GPL9336	19911421	-0.15	0.15	log value from GEO, segmented by DNAcopy/cbs
GSM458309	GSE12520	GPL9336	19911421	-0.15	0.15	log value from GEO, segmented by DNAcopy/cbs
GSM458310	GSE12520	GPL9336	19911421	-0.15	0.15	log value from GEO, segmented by DNAcopy/cbs
GSM458311	GSE12520	GPL9336	19911421	-0.15	0.15	log value from GEO, segmented by DNAcopy/cbs
GSM313652	GSE12523	GPL6853		-0.15	0.15	log value from GEO, segmented by DNAcopy/cbs
GSM313659	GSE12523	GPL6853		-0.15	0.15	log value from GEO, segmented by DNAcopy/cbs
GSM313666	GSE12523	GPL6853		-0.15	0.15	log value from GEO, segmented by DNAcopy/cbs
GSM313674	GSE12523	GPL6853		-0.15	0.15	log value from GEO, segmented by DNAcopy/cbs
GSM313678	GSE12523	GPL6853		-0.15	0.15	log value from GEO, segmented by DNAcopy/cbs
GSM313681	GSE12523	GPL6853		-0.15	0.15	log value from GEO, segmented by DNAcopy/cbs
GSM313683	GSE12523	GPL6853		-0.15	0.15	log value from GEO, segmented by DNAcopy/cbs
GSM313686	GSE12523	GPL6853		-0.15	0.15	log value from GEO, segmented by DNAcopy/cbs
GSM313687	GSE12523	GPL6853		-0.15	0.15	log value from GEO, segmented by DNAcopy/cbs
GSM313690	GSE12523	GPL6853		-0.15	0.15	log value from GEO, segmented by DNAcopy/cbs
GSM313692	GSE12523	GPL6853		-0.15	0.15	log value from GEO, segmented by DNAcopy/cbs
GSM313694	GSE12523	GPL6853		-0.15	0.15	log value from GEO, segmented by DNAcopy/cbs
GSM313695	GSE12523	GPL6853		-0.15	0.15	log value from GEO, segmented by DNAcopy/cbs
GSM313698	GSE12523	GPL6853		-0.15	0.15	log value from GEO, segmented by DNAcopy/cbs
GSM313700	GSE12523	GPL6853		-0.15	0.15	log value from GEO, segmented by DNAcopy/cbs
GSM313702	GSE12523	GPL6853		-0.15	0.15	log value from GEO, segmented by DNAcopy/cbs
GSM313703	GSE12523	GPL6853		-0.15	0.15	log value from GEO, segmented by DNAcopy/cbs
GSM313704	GSE12523	GPL6853		-0.15	0.15	log value from GEO, segmented by DNAcopy/cbs
GSM313705	GSE12523	GPL6853		-0.15	0.15	log value from GEO, segmented by DNAcopy/cbs
GSM313706	GSE12523	GPL6853		-0.15	0.15	log value from GEO, segmented by DNAcopy/cbs
GSM313707	GSE12523	GPL6853		-0.15	0.15	log value from GEO, segmented by DNAcopy/cbs
GSM313708	GSE12523	GPL6853		-0.15	0.15	log value from GEO, segmented by DNAcopy/cbs
GSM313709	GSE12523	GPL6853		-0.15	0.15	log value from GEO, segmented by DNAcopy/cbs
GSM313710	GSE12523	GPL6853		-0.15	0.15	log value from GEO, segmented by DNAcopy/cbs
GSM313711	GSE12523	GPL6853		-0.15	0.15	log value from GEO, segmented by DNAcopy/cbs
GSM313712	GSE12523	GPL6853		-0.15	0.15	log value from GEO, segmented by DNAcopy/cbs
GSM313713	GSE12523	GPL6853		-0.15	0.15	log value from GEO, segmented by DNAcopy/cbs
GSM313714	GSE12523	GPL6853		-0.15	0.15	log value from GEO, segmented by DNAcopy/cbs
GSM313715	GSE12523	GPL6853		-0.15	0.15	log value from GEO, segmented by DNAcopy/cbs
GSM313716	GSE12523	GPL6853		-0.15	0.15	log value from GEO, segmented by DNAcopy/cbs
GSM313717	GSE12523	GPL6853		-0.15	0.15	log value from GEO, segmented by DNAcopy/cbs
GSM315709	GSE12593	GPL4723	19199331	-0.15	0.15	log value from GEO, segmented by DNAcopy/cbs
GSM315710	GSE12593	GPL4723	19199331	-0.15	0.15	log value from GEO, segmented by DNAcopy/cbs
GSM315711	GSE12593	GPL4723	19199331	-0.15	0.15	log value from GEO, segmented by DNAcopy/cbs
GSM315712	GSE12593	GPL4723	19199331	-0.15	0.15	log value from GEO, segmented by DNAcopy/cbs
GSM318356	GSE12668	GPL4091	19351844,19362969	-0.15	0.15	log value from GEO, segmented by DNAcopy/cbs
GSM318357	GSE12668	GPL4091	19351844,19362969	-0.15	0.15	log value from GEO, segmented by DNAcopy/cbs
GSM318358	GSE12668	GPL4091	19351844,19362969	-0.15	0.15	log value from GEO, segmented by DNAcopy/cbs
GSM318359	GSE12668	GPL4091	19351844,19362969	-0.15	0.15	log value from GEO, segmented by DNAcopy/cbs
GSM318360	GSE12668	GPL4091	19351844,19362969	-0.15	0.15	log value from GEO, segmented by DNAcopy/cbs
GSM318361	GSE12668	GPL4091	19351844,19362969	-0.15	0.15	log value from GEO, segmented by DNAcopy/cbs
GSM318362	GSE12668	GPL4091	19351844,19362969	-0.15	0.15	log value from GEO, segmented by DNAcopy/cbs
GSM318363	GSE12668	GPL4091	19351844,19362969	-0.15	0.15	log value from GEO, segmented by DNAcopy/cbs
GSM318364	GSE12668	GPL4091	19351844,19362969	-0.15	0.15	log value from GEO, segmented by DNAcopy/cbs
GSM318365	GSE12668	GPL4091	19351844,19362969	-0.15	0.15	log value from GEO, segmented by DNAcopy/cbs
GSM318366	GSE12668	GPL4091	19351844,19362969	-0.15	0.15	log value from GEO, segmented by DNAcopy/cbs
GSM318367	GSE12668	GPL4091	19351844,19362969	-0.15	0.15	log value from GEO, segmented by DNAcopy/cbs
GSM318368	GSE12668	GPL4091	19351844,19362969	-0.15	0.15	log value from GEO, segmented by DNAcopy/cbs
GSM318369	GSE12668	GPL4091	19351844,19362969	-0.15	0.15	log value from GEO, segmented by DNAcopy/cbs
GSM318370	GSE12668	GPL4091	19351844,19362969	-0.15	0.15	log value from GEO, segmented by DNAcopy/cbs
GSM318371	GSE12668	GPL4091	19351844,19362969	-0.15	0.15	log value from GEO, segmented by DNAcopy/cbs
GSM318372	GSE12668	GPL4091	19351844,19362969	-0.15	0.15	log value from GEO, segmented by DNAcopy/cbs
GSM318373	GSE12668	GPL4091	19351844,19362969	-0.15	0.15	log value from GEO, segmented by DNAcopy/cbs
GSM318374	GSE12668	GPL4091	19351844,19362969	-0.15	0.15	log value from GEO, segmented by DNAcopy/cbs
GSM318375	GSE12668	GPL4091	19351844,19362969	-0.15	0.15	log value from GEO, segmented by DNAcopy/cbs
GSM318376	GSE12668	GPL4091	19351844,19362969	-0.15	0.15	log value from GEO, segmented by DNAcopy/cbs
GSM318377	GSE12668	GPL4091	19351844,19362969	-0.15	0.15	log value from GEO, segmented by DNAcopy/cbs
GSM318378	GSE12668	GPL4091	19351844,19362969	-0.15	0.15	log value from GEO, segmented by DNAcopy/cbs
GSM318379	GSE12668	GPL4091	19351844,19362969	-0.15	0.15	log value from GEO, segmented by DNAcopy/cbs
GSM318380	GSE12668	GPL4091	19351844,19362969	-0.15	0.15	log value from GEO, segmented by DNAcopy/cbs
GSM318381	GSE12668	GPL4091	19351844,19362969	-0.15	0.15	log value from GEO, segmented by DNAcopy/cbs
GSM318382	GSE12668	GPL4091	19351844,19362969	-0.15	0.15	log value from GEO, segmented by DNAcopy/cbs
GSM318383	GSE12668	GPL4091	19351844,19362969	-0.15	0.15	log value from GEO, segmented by DNAcopy/cbs
GSM318384	GSE12668	GPL4091	19351844,19362969	-0.15	0.15	log value from GEO, segmented by DNAcopy/cbs
GSM318385	GSE12668	GPL4091	19351844,19362969	-0.15	0.15	log value from GEO, segmented by DNAcopy/cbs
GSM318386	GSE12668	GPL4091	19351844,19362969	-0.15	0.15	log value from GEO, segmented by DNAcopy/cbs
GSM318387	GSE12668	GPL4091	19351844,19362969	-0.15	0.15	log value from GEO, segmented by DNAcopy/cbs
GSM318388	GSE12668	GPL4091	19351844,19362969	-0.15	0.15	log value from GEO, segmented by DNAcopy/cbs
GSM318389	GSE12668	GPL4091	19351844,19362969	-0.15	0.15	log value from GEO, segmented by DNAcopy/cbs
GSM318390	GSE12668	GPL4091	19351844,19362969	-0.15	0.15	log value from GEO, segmented by DNAcopy/cbs
GSM318391	GSE12668	GPL4091	19351844,19362969	-0.15	0.15	log value from GEO, segmented by DNAcopy/cbs
GSM318392	GSE12668	GPL4091	19351844,19362969	-0.15	0.15	log value from GEO, segmented by DNAcopy/cbs
GSM318393	GSE12668	GPL4091	19351844,19362969	-0.15	0.15	log value from GEO, segmented by DNAcopy/cbs
GSM318394	GSE12668	GPL4091	19351844,19362969	-0.15	0.15	log value from GEO, segmented by DNAcopy/cbs
GSM318395	GSE12668	GPL4091	19351844,19362969	-0.15	0.15	log value from GEO, segmented by DNAcopy/cbs
GSM318396	GSE12668	GPL4091	19351844,19362969	-0.15	0.15	log value from GEO, segmented by DNAcopy/cbs
GSM318397	GSE12668	GPL4091	19351844,19362969	-0.15	0.15	log value from GEO, segmented by DNAcopy/cbs
GSM320088	GSE12759	GPL4723	18823530	-0.15	0.15	log value from GEO, segmented by DNAcopy/cbs
GSM320089	GSE12759	GPL4723	18823530	-0.15	0.15	log value from GEO, segmented by DNAcopy/cbs
GSM320090	GSE12759	GPL7247	18823530	-0.15	0.15	log value from GEO, segmented by DNAcopy/cbs
GSM320091	GSE12759	GPL4723	18823530	-0.15	0.15	log value from GEO, segmented by DNAcopy/cbs
GSM320092	GSE12759	GPL4723	18823530	-0.15	0.15	log value from GEO, segmented by DNAcopy/cbs
GSM320093	GSE12759	GPL4723	18823530	-0.15	0.15	log value from GEO, segmented by DNAcopy/cbs
GSM320094	GSE12759	GPL4723	18823530	-0.15	0.15	log value from GEO, segmented by DNAcopy/cbs
GSM320095	GSE12759	GPL4723	18823530	-0.15	0.15	log value from GEO, segmented by DNAcopy/cbs
GSM320096	GSE12759	GPL4723	18823530	-0.15	0.15	log value from GEO, segmented by DNAcopy/cbs
GSM320097	GSE12759	GPL4723	18823530	-0.15	0.15	log value from GEO, segmented by DNAcopy/cbs
GSM320098	GSE12759	GPL4723	18823530	-0.15	0.15	log value from GEO, segmented by DNAcopy/cbs
GSM320099	GSE12759	GPL4723	18823530	-0.15	0.15	log value from GEO, segmented by DNAcopy/cbs
GSM320100	GSE12759	GPL4723	18823530	-0.15	0.15	log value from GEO, segmented by DNAcopy/cbs
GSM320101	GSE12759	GPL4723	18823530	-0.15	0.15	log value from GEO, segmented by DNAcopy/cbs
GSM320102	GSE12759	GPL4723	18823530	-0.15	0.15	log value from GEO, segmented by DNAcopy/cbs
GSM320103	GSE12759	GPL4723	18823530	-0.15	0.15	log value from GEO, segmented by DNAcopy/cbs
GSM320104	GSE12759	GPL4723	18823530	-0.15	0.15	log value from GEO, segmented by DNAcopy/cbs
GSM320105	GSE12759	GPL4723	18823530	-0.15	0.15	log value from GEO, segmented by DNAcopy/cbs
GSM320106	GSE12759	GPL4723	18823530	-0.15	0.15	log value from GEO, segmented by DNAcopy/cbs
GSM320107	GSE12759	GPL4723	18823530	-0.15	0.15	log value from GEO, segmented by DNAcopy/cbs
GSM320108	GSE12759	GPL4723	18823530	-0.15	0.15	log value from GEO, segmented by DNAcopy/cbs
GSM320109	GSE12759	GPL4723	18823530	-0.15	0.15	log value from GEO, segmented by DNAcopy/cbs
GSM320110	GSE12759	GPL4723	18823530	-0.15	0.15	log value from GEO, segmented by DNAcopy/cbs
GSM320111	GSE12759	GPL4723	18823530	-0.15	0.15	log value from GEO, segmented by DNAcopy/cbs
GSM320112	GSE12759	GPL4723	18823530	-0.15	0.15	log value from GEO, segmented by DNAcopy/cbs
GSM320113	GSE12759	GPL4723	18823530	-0.15	0.15	log value from GEO, segmented by DNAcopy/cbs
GSM320114	GSE12759	GPL4723	18823530	-0.15	0.15	log value from GEO, segmented by DNAcopy/cbs
GSM320115	GSE12759	GPL4723	18823530	-0.15	0.15	log value from GEO, segmented by DNAcopy/cbs
GSM320116	GSE12759	GPL4723	18823530	-0.15	0.15	log value from GEO, segmented by DNAcopy/cbs
GSM320117	GSE12759	GPL4723	18823530	-0.15	0.15	log value from GEO, segmented by DNAcopy/cbs
GSM320118	GSE12759	GPL4723	18823530	-0.15	0.15	log value from GEO, segmented by DNAcopy/cbs
GSM320119	GSE12759	GPL4723	18823530	-0.15	0.15	log value from GEO, segmented by DNAcopy/cbs
GSM320120	GSE12759	GPL4723	18823530	-0.15	0.15	log value from GEO, segmented by DNAcopy/cbs
GSM320121	GSE12759	GPL4723	18823530	-0.15	0.15	log value from GEO, segmented by DNAcopy/cbs
GSM320122	GSE12759	GPL4723	18823530	-0.15	0.15	log value from GEO, segmented by DNAcopy/cbs
GSM320123	GSE12759	GPL4723	18823530	-0.15	0.15	log value from GEO, segmented by DNAcopy/cbs
GSM320124	GSE12759	GPL4723	18823530	-0.15	0.15	log value from GEO, segmented by DNAcopy/cbs
GSM320125	GSE12759	GPL4723	18823530	-0.15	0.15	log value from GEO, segmented by DNAcopy/cbs
GSM320126	GSE12759	GPL4723	18823530	-0.15	0.15	log value from GEO, segmented by DNAcopy/cbs
GSM320127	GSE12759	GPL4723	18823530	-0.15	0.15	log value from GEO, segmented by DNAcopy/cbs
GSM320128	GSE12759	GPL4723	18823530	-0.15	0.15	log value from GEO, segmented by DNAcopy/cbs
GSM320129	GSE12759	GPL7247	18823530	-0.15	0.15	log value from GEO, segmented by DNAcopy/cbs
GSM320130	GSE12759	GPL4723	18823530	-0.15	0.15	log value from GEO, segmented by DNAcopy/cbs
GSM320131	GSE12759	GPL4723	18823530	-0.15	0.15	log value from GEO, segmented by DNAcopy/cbs
GSM320132	GSE12759	GPL4723	18823530	-0.15	0.15	log value from GEO, segmented by DNAcopy/cbs
GSM320133	GSE12759	GPL4723	18823530	-0.15	0.15	log value from GEO, segmented by DNAcopy/cbs
GSM320134	GSE12759	GPL4723	18823530	-0.15	0.15	log value from GEO, segmented by DNAcopy/cbs
GSM320135	GSE12759	GPL4723	18823530	-0.15	0.15	log value from GEO, segmented by DNAcopy/cbs
GSM320136	GSE12759	GPL4723	18823530	-0.15	0.15	log value from GEO, segmented by DNAcopy/cbs
GSM320137	GSE12759	GPL4723	18823530	-0.15	0.15	log value from GEO, segmented by DNAcopy/cbs
GSM320138	GSE12759	GPL4723	18823530	-0.15	0.15	log value from GEO, segmented by DNAcopy/cbs
GSM320139	GSE12759	GPL4723	18823530	-0.15	0.15	log value from GEO, segmented by DNAcopy/cbs
GSM320140	GSE12759	GPL4723	18823530	-0.15	0.15	log value from GEO, segmented by DNAcopy/cbs
GSM320141	GSE12759	GPL4723	18823530	-0.15	0.15	log value from GEO, segmented by DNAcopy/cbs
GSM320142	GSE12759	GPL4723	18823530	-0.15	0.15	log value from GEO, segmented by DNAcopy/cbs
GSM320143	GSE12759	GPL4723	18823530	-0.15	0.15	log value from GEO, segmented by DNAcopy/cbs
GSM320171	GSE12761	GPL7298	19330026	-0.15	0.15	log value from GEO, segmented by DNAcopy/cbs
GSM320172	GSE12761	GPL7298	19330026	-0.15	0.15	log value from GEO, segmented by DNAcopy/cbs
GSM320173	GSE12761	GPL7298	19330026	-0.15	0.15	log value from GEO, segmented by DNAcopy/cbs
GSM320174	GSE12761	GPL7298	19330026	-0.15	0.15	log value from GEO, segmented by DNAcopy/cbs
GSM320175	GSE12761	GPL7298	19330026	-0.15	0.15	log value from GEO, segmented by DNAcopy/cbs
GSM320176	GSE12761	GPL7298	19330026	-0.15	0.15	log value from GEO, segmented by DNAcopy/cbs
GSM320177	GSE12761	GPL7298	19330026	-0.15	0.15	log value from GEO, segmented by DNAcopy/cbs
GSM320178	GSE12761	GPL7298	19330026	-0.15	0.15	log value from GEO, segmented by DNAcopy/cbs
GSM320179	GSE12761	GPL7298	19330026	-0.15	0.15	log value from GEO, segmented by DNAcopy/cbs
GSM320180	GSE12761	GPL7298	19330026	-0.15	0.15	log value from GEO, segmented by DNAcopy/cbs
GSM320181	GSE12761	GPL7298	19330026	-0.15	0.15	log value from GEO, segmented by DNAcopy/cbs
GSM320182	GSE12761	GPL7298	19330026	-0.15	0.15	log value from GEO, segmented by DNAcopy/cbs
GSM320183	GSE12761	GPL7298	19330026	-0.15	0.15	log value from GEO, segmented by DNAcopy/cbs
GSM320184	GSE12761	GPL7298	19330026	-0.15	0.15	log value from GEO, segmented by DNAcopy/cbs
GSM320185	GSE12761	GPL7298	19330026	-0.15	0.15	log value from GEO, segmented by DNAcopy/cbs
GSM320186	GSE12761	GPL7298	19330026	-0.15	0.15	log value from GEO, segmented by DNAcopy/cbs
GSM320187	GSE12761	GPL7298	19330026	-0.15	0.15	log value from GEO, segmented by DNAcopy/cbs
GSM320188	GSE12761	GPL7298	19330026	-0.15	0.15	log value from GEO, segmented by DNAcopy/cbs
GSM320189	GSE12761	GPL7298	19330026	-0.15	0.15	log value from GEO, segmented by DNAcopy/cbs
GSM320190	GSE12761	GPL7298	19330026	-0.15	0.15	log value from GEO, segmented by DNAcopy/cbs
GSM320191	GSE12761	GPL7298	19330026	-0.15	0.15	log value from GEO, segmented by DNAcopy/cbs
GSM320192	GSE12761	GPL7298	19330026	-0.15	0.15	log value from GEO, segmented by DNAcopy/cbs
GSM320193	GSE12761	GPL7298	19330026	-0.15	0.15	log value from GEO, segmented by DNAcopy/cbs
GSM320194	GSE12761	GPL7298	19330026	-0.15	0.15	log value from GEO, segmented by DNAcopy/cbs
GSM320195	GSE12761	GPL7298	19330026	-0.15	0.15	log value from GEO, segmented by DNAcopy/cbs
GSM320196	GSE12761	GPL7298	19330026	-0.15	0.15	log value from GEO, segmented by DNAcopy/cbs
GSM320197	GSE12761	GPL7298	19330026	-0.15	0.15	log value from GEO, segmented by DNAcopy/cbs
GSM320198	GSE12761	GPL7298	19330026	-0.15	0.15	log value from GEO, segmented by DNAcopy/cbs
GSM320199	GSE12761	GPL7298	19330026	-0.15	0.15	log value from GEO, segmented by DNAcopy/cbs
GSM320200	GSE12761	GPL7298	19330026	-0.15	0.15	log value from GEO, segmented by DNAcopy/cbs
GSM320201	GSE12761	GPL7298	19330026	-0.15	0.15	log value from GEO, segmented by DNAcopy/cbs
GSM320202	GSE12761	GPL7298	19330026	-0.15	0.15	log value from GEO, segmented by DNAcopy/cbs
GSM320203	GSE12761	GPL7298	19330026	-0.15	0.15	log value from GEO, segmented by DNAcopy/cbs
GSM320204	GSE12761	GPL7298	19330026	-0.15	0.15	log value from GEO, segmented by DNAcopy/cbs
GSM320205	GSE12761	GPL7298	19330026	-0.15	0.15	log value from GEO, segmented by DNAcopy/cbs
GSM320206	GSE12761	GPL7298	19330026	-0.15	0.15	log value from GEO, segmented by DNAcopy/cbs
GSM320207	GSE12761	GPL7298	19330026	-0.15	0.15	log value from GEO, segmented by DNAcopy/cbs
GSM320208	GSE12761	GPL7298	19330026	-0.15	0.15	log value from GEO, segmented by DNAcopy/cbs
GSM320209	GSE12761	GPL7298	19330026	-0.15	0.15	log value from GEO, segmented by DNAcopy/cbs
GSM320210	GSE12761	GPL7298	19330026	-0.15	0.15	log value from GEO, segmented by DNAcopy/cbs
GSM320211	GSE12761	GPL7298	19330026	-0.15	0.15	log value from GEO, segmented by DNAcopy/cbs
GSM320212	GSE12761	GPL7298	19330026	-0.15	0.15	log value from GEO, segmented by DNAcopy/cbs
GSM320892	GSE12794	GPL7313	18922857	-0.15	0.15	log value from GEO, segmented by DNAcopy/cbs
GSM320893	GSE12794	GPL7313	18922857	-0.15	0.15	log value from GEO, segmented by DNAcopy/cbs
GSM320894	GSE12794	GPL7313	18922857	-0.15	0.15	log value from GEO, segmented by DNAcopy/cbs
GSM320895	GSE12794	GPL7313	18922857	-0.15	0.15	log value from GEO, segmented by DNAcopy/cbs
GSM320896	GSE12794	GPL7313	18922857	-0.15	0.15	log value from GEO, segmented by DNAcopy/cbs
GSM320897	GSE12794	GPL7313	18922857	-0.15	0.15	log value from GEO, segmented by DNAcopy/cbs
GSM320898	GSE12794	GPL7313	18922857	-0.15	0.15	log value from GEO, segmented by DNAcopy/cbs
GSM320899	GSE12794	GPL7313	18922857	-0.15	0.15	log value from GEO, segmented by DNAcopy/cbs
GSM320900	GSE12794	GPL7313	18922857	-0.15	0.15	log value from GEO, segmented by DNAcopy/cbs
GSM320901	GSE12794	GPL7313	18922857	-0.15	0.15	log value from GEO, segmented by DNAcopy/cbs
GSM320902	GSE12794	GPL7313	18922857	-0.15	0.15	log value from GEO, segmented by DNAcopy/cbs
GSM320903	GSE12794	GPL7313	18922857	-0.15	0.15	log value from GEO, segmented by DNAcopy/cbs
GSM320904	GSE12794	GPL7313	18922857	-0.15	0.15	log value from GEO, segmented by DNAcopy/cbs
GSM320905	GSE12794	GPL7313	18922857	-0.15	0.15	log value from GEO, segmented by DNAcopy/cbs
GSM320906	GSE12794	GPL7313	18922857	-0.15	0.15	log value from GEO, segmented by DNAcopy/cbs
GSM320907	GSE12794	GPL7313	18922857	-0.15	0.15	log value from GEO, segmented by DNAcopy/cbs
GSM320908	GSE12794	GPL7313	18922857	-0.15	0.15	log value from GEO, segmented by DNAcopy/cbs
GSM320909	GSE12794	GPL7313	18922857	-0.15	0.15	log value from GEO, segmented by DNAcopy/cbs
GSM320910	GSE12794	GPL7313	18922857	-0.15	0.15	log value from GEO, segmented by DNAcopy/cbs
GSM320911	GSE12794	GPL7313	18922857	-0.15	0.15	log value from GEO, segmented by DNAcopy/cbs
GSM320912	GSE12794	GPL7313	18922857	-0.15	0.15	log value from GEO, segmented by DNAcopy/cbs
GSM320913	GSE12794	GPL7313	18922857	-0.15	0.15	log value from GEO, segmented by DNAcopy/cbs
GSM320914	GSE12794	GPL7313	18922857	-0.15	0.15	log value from GEO, segmented by DNAcopy/cbs
GSM320915	GSE12794	GPL7313	18922857	-0.15	0.15	log value from GEO, segmented by DNAcopy/cbs
GSM320916	GSE12794	GPL7313	18922857	-0.15	0.15	log value from GEO, segmented by DNAcopy/cbs
GSM320917	GSE12794	GPL7313	18922857	-0.15	0.15	log value from GEO, segmented by DNAcopy/cbs
GSM320918	GSE12794	GPL7313	18922857	-0.15	0.15	log value from GEO, segmented by DNAcopy/cbs
GSM320919	GSE12794	GPL7313	18922857	-0.15	0.15	log value from GEO, segmented by DNAcopy/cbs
GSM320920	GSE12794	GPL7313	18922857	-0.15	0.15	log value from GEO, segmented by DNAcopy/cbs
GSM320921	GSE12794	GPL7313	18922857	-0.15	0.15	log value from GEO, segmented by DNAcopy/cbs
GSM320922	GSE12794	GPL7313	18922857	-0.15	0.15	log value from GEO, segmented by DNAcopy/cbs
GSM320923	GSE12794	GPL7313	18922857	-0.15	0.15	log value from GEO, segmented by DNAcopy/cbs
GSM320924	GSE12794	GPL7313	18922857	-0.15	0.15	log value from GEO, segmented by DNAcopy/cbs
GSM320925	GSE12794	GPL7313	18922857	-0.15	0.15	log value from GEO, segmented by DNAcopy/cbs
GSM320926	GSE12794	GPL7313	18922857	-0.15	0.15	log value from GEO, segmented by DNAcopy/cbs
GSM320927	GSE12794	GPL7313	18922857	-0.15	0.15	log value from GEO, segmented by DNAcopy/cbs
GSM320928	GSE12794	GPL7313	18922857	-0.15	0.15	log value from GEO, segmented by DNAcopy/cbs
GSM320929	GSE12794	GPL7313	18922857	-0.15	0.15	log value from GEO, segmented by DNAcopy/cbs
GSM320930	GSE12794	GPL7313	18922857	-0.15	0.15	log value from GEO, segmented by DNAcopy/cbs
GSM320931	GSE12794	GPL7313	18922857	-0.15	0.15	log value from GEO, segmented by DNAcopy/cbs
GSM320932	GSE12794	GPL7313	18922857	-0.15	0.15	log value from GEO, segmented by DNAcopy/cbs
GSM320933	GSE12794	GPL7313	18922857	-0.15	0.15	log value from GEO, segmented by DNAcopy/cbs
GSM320934	GSE12794	GPL7313	18922857	-0.15	0.15	log value from GEO, segmented by DNAcopy/cbs
GSM320935	GSE12794	GPL7313	18922857	-0.15	0.15	log value from GEO, segmented by DNAcopy/cbs
GSM320936	GSE12794	GPL7313	18922857	-0.15	0.15	log value from GEO, segmented by DNAcopy/cbs
GSM320937	GSE12794	GPL7313	18922857	-0.15	0.15	log value from GEO, segmented by DNAcopy/cbs
GSM320938	GSE12794	GPL7313	18922857	-0.15	0.15	log value from GEO, segmented by DNAcopy/cbs
GSM320939	GSE12794	GPL7313	18922857	-0.15	0.15	log value from GEO, segmented by DNAcopy/cbs
GSM320940	GSE12794	GPL7313	18922857	-0.15	0.15	log value from GEO, segmented by DNAcopy/cbs
GSM320941	GSE12794	GPL7313	18922857	-0.15	0.15	log value from GEO, segmented by DNAcopy/cbs
GSM320942	GSE12794	GPL7313	18922857	-0.15	0.15	log value from GEO, segmented by DNAcopy/cbs
GSM320943	GSE12794	GPL7313	18922857	-0.15	0.15	log value from GEO, segmented by DNAcopy/cbs
GSM322754	GSE12794	GPL7314	18922857	-0.15	0.15	log value from GEO, segmented by DNAcopy/cbs
GSM322755	GSE12794	GPL7314	18922857	-0.15	0.15	log value from GEO, segmented by DNAcopy/cbs
GSM322756	GSE12794	GPL7314	18922857	-0.15	0.15	log value from GEO, segmented by DNAcopy/cbs
GSM322757	GSE12794	GPL7314	18922857	-0.15	0.15	log value from GEO, segmented by DNAcopy/cbs
GSM322758	GSE12794	GPL7314	18922857	-0.15	0.15	log value from GEO, segmented by DNAcopy/cbs
GSM322759	GSE12794	GPL7314	18922857	-0.15	0.15	log value from GEO, segmented by DNAcopy/cbs
GSM322760	GSE12794	GPL7314	18922857	-0.15	0.15	log value from GEO, segmented by DNAcopy/cbs
GSM322761	GSE12794	GPL7314	18922857	-0.15	0.15	log value from GEO, segmented by DNAcopy/cbs
GSM322762	GSE12794	GPL7314	18922857	-0.15	0.15	log value from GEO, segmented by DNAcopy/cbs
GSM322763	GSE12794	GPL7314	18922857	-0.15	0.15	log value from GEO, segmented by DNAcopy/cbs
GSM322764	GSE12794	GPL7314	18922857	-0.15	0.15	log value from GEO, segmented by DNAcopy/cbs
GSM322765	GSE12794	GPL7314	18922857	-0.15	0.15	log value from GEO, segmented by DNAcopy/cbs
GSM322766	GSE12794	GPL7314	18922857	-0.15	0.15	log value from GEO, segmented by DNAcopy/cbs
GSM322767	GSE12794	GPL7314	18922857	-0.15	0.15	log value from GEO, segmented by DNAcopy/cbs
GSM322768	GSE12794	GPL7314	18922857	-0.15	0.15	log value from GEO, segmented by DNAcopy/cbs
GSM322769	GSE12794	GPL7314	18922857	-0.15	0.15	log value from GEO, segmented by DNAcopy/cbs
GSM322770	GSE12794	GPL7314	18922857	-0.15	0.15	log value from GEO, segmented by DNAcopy/cbs
GSM322771	GSE12794	GPL7314	18922857	-0.15	0.15	log value from GEO, segmented by DNAcopy/cbs
GSM322772	GSE12794	GPL7314	18922857	-0.15	0.15	log value from GEO, segmented by DNAcopy/cbs
GSM322773	GSE12794	GPL7314	18922857	-0.15	0.15	log value from GEO, segmented by DNAcopy/cbs
GSM322774	GSE12794	GPL7314	18922857	-0.15	0.15	log value from GEO, segmented by DNAcopy/cbs
GSM322775	GSE12794	GPL7314	18922857	-0.15	0.15	log value from GEO, segmented by DNAcopy/cbs
GSM322776	GSE12794	GPL7314	18922857	-0.15	0.15	log value from GEO, segmented by DNAcopy/cbs
GSM322777	GSE12794	GPL7314	18922857	-0.15	0.15	log value from GEO, segmented by DNAcopy/cbs
GSM322778	GSE12794	GPL7314	18922857	-0.15	0.15	log value from GEO, segmented by DNAcopy/cbs
GSM322779	GSE12794	GPL7314	18922857	-0.15	0.15	log value from GEO, segmented by DNAcopy/cbs
GSM322780	GSE12794	GPL7314	18922857	-0.15	0.15	log value from GEO, segmented by DNAcopy/cbs
GSM322781	GSE12794	GPL7314	18922857	-0.15	0.15	log value from GEO, segmented by DNAcopy/cbs
GSM322782	GSE12794	GPL7314	18922857	-0.15	0.15	log value from GEO, segmented by DNAcopy/cbs
GSM322783	GSE12794	GPL7314	18922857	-0.15	0.15	log value from GEO, segmented by DNAcopy/cbs
GSM322784	GSE12794	GPL7314	18922857	-0.15	0.15	log value from GEO, segmented by DNAcopy/cbs
GSM322785	GSE12794	GPL7314	18922857	-0.15	0.15	log value from GEO, segmented by DNAcopy/cbs
GSM322786	GSE12794	GPL7314	18922857	-0.15	0.15	log value from GEO, segmented by DNAcopy/cbs
GSM322787	GSE12794	GPL7314	18922857	-0.15	0.15	log value from GEO, segmented by DNAcopy/cbs
GSM322788	GSE12794	GPL7314	18922857	-0.15	0.15	log value from GEO, segmented by DNAcopy/cbs
GSM322789	GSE12794	GPL7314	18922857	-0.15	0.15	log value from GEO, segmented by DNAcopy/cbs
GSM322790	GSE12794	GPL7314	18922857	-0.15	0.15	log value from GEO, segmented by DNAcopy/cbs
GSM322791	GSE12794	GPL7314	18922857	-0.15	0.15	log value from GEO, segmented by DNAcopy/cbs
GSM322792	GSE12794	GPL7314	18922857	-0.15	0.15	log value from GEO, segmented by DNAcopy/cbs
GSM322793	GSE12794	GPL7314	18922857	-0.15	0.15	log value from GEO, segmented by DNAcopy/cbs
GSM322794	GSE12794	GPL7314	18922857	-0.15	0.15	log value from GEO, segmented by DNAcopy/cbs
GSM322795	GSE12794	GPL7314	18922857	-0.15	0.15	log value from GEO, segmented by DNAcopy/cbs
GSM322796	GSE12794	GPL7314	18922857	-0.15	0.15	log value from GEO, segmented by DNAcopy/cbs
GSM322797	GSE12794	GPL7314	18922857	-0.15	0.15	log value from GEO, segmented by DNAcopy/cbs
GSM322798	GSE12794	GPL7314	18922857	-0.15	0.15	log value from GEO, segmented by DNAcopy/cbs
GSM322799	GSE12794	GPL7314	18922857	-0.15	0.15	log value from GEO, segmented by DNAcopy/cbs
GSM322800	GSE12794	GPL7314	18922857	-0.15	0.15	log value from GEO, segmented by DNAcopy/cbs
GSM322801	GSE12794	GPL7314	18922857	-0.15	0.15	log value from GEO, segmented by DNAcopy/cbs
GSM322802	GSE12794	GPL7314	18922857	-0.15	0.15	log value from GEO, segmented by DNAcopy/cbs
GSM322803	GSE12794	GPL7314	18922857	-0.15	0.15	log value from GEO, segmented by DNAcopy/cbs
GSM322804	GSE12794	GPL7314	18922857	-0.15	0.15	log value from GEO, segmented by DNAcopy/cbs
GSM322805	GSE12794	GPL7314	18922857	-0.15	0.15	log value from GEO, segmented by DNAcopy/cbs
GSM322806	GSE12794	GPL7314	18922857	-0.15	0.15	log value from GEO, segmented by DNAcopy/cbs
GSM322807	GSE12794	GPL7314	18922857	-0.15	0.15	log value from GEO, segmented by DNAcopy/cbs
GSM322808	GSE12794	GPL7314	18922857	-0.15	0.15	log value from GEO, segmented by DNAcopy/cbs
GSM322809	GSE12794	GPL7314	18922857	-0.15	0.15	log value from GEO, segmented by DNAcopy/cbs
GSM322810	GSE12794	GPL7314	18922857	-0.15	0.15	log value from GEO, segmented by DNAcopy/cbs
GSM322811	GSE12794	GPL7314	18922857	-0.15	0.15	log value from GEO, segmented by DNAcopy/cbs
GSM322812	GSE12794	GPL7314	18922857	-0.15	0.15	log value from GEO, segmented by DNAcopy/cbs
GSM322813	GSE12794	GPL7314	18922857	-0.15	0.15	log value from GEO, segmented by DNAcopy/cbs
GSM322814	GSE12794	GPL7314	18922857	-0.15	0.15	log value from GEO, segmented by DNAcopy/cbs
GSM322815	GSE12794	GPL7314	18922857	-0.15	0.15	log value from GEO, segmented by DNAcopy/cbs
GSM322816	GSE12794	GPL7314	18922857	-0.15	0.15	log value from GEO, segmented by DNAcopy/cbs
GSM322817	GSE12794	GPL7314	18922857	-0.15	0.15	log value from GEO, segmented by DNAcopy/cbs
GSM322874	GSE12794	GPL7314	18922857	-0.15	0.15	log value from GEO, segmented by DNAcopy/cbs
GSM322875	GSE12794	GPL7314	18922857	-0.15	0.15	log value from GEO, segmented by DNAcopy/cbs
GSM322876	GSE12794	GPL7314	18922857	-0.15	0.15	log value from GEO, segmented by DNAcopy/cbs
GSM322877	GSE12794	GPL7314	18922857	-0.15	0.15	log value from GEO, segmented by DNAcopy/cbs
GSM322878	GSE12794	GPL7314	18922857	-0.15	0.15	log value from GEO, segmented by DNAcopy/cbs
GSM322879	GSE12794	GPL7314	18922857	-0.15	0.15	log value from GEO, segmented by DNAcopy/cbs
GSM322880	GSE12794	GPL7314	18922857	-0.15	0.15	log value from GEO, segmented by DNAcopy/cbs
GSM322881	GSE12794	GPL7314	18922857	-0.15	0.15	log value from GEO, segmented by DNAcopy/cbs
GSM322882	GSE12794	GPL7314	18922857	-0.15	0.15	log value from GEO, segmented by DNAcopy/cbs
GSM322883	GSE12794	GPL7314	18922857	-0.15	0.15	log value from GEO, segmented by DNAcopy/cbs
GSM322884	GSE12794	GPL7314	18922857	-0.15	0.15	log value from GEO, segmented by DNAcopy/cbs
GSM322885	GSE12794	GPL7314	18922857	-0.15	0.15	log value from GEO, segmented by DNAcopy/cbs
GSM322886	GSE12794	GPL7314	18922857	-0.15	0.15	log value from GEO, segmented by DNAcopy/cbs
GSM322887	GSE12794	GPL7314	18922857	-0.15	0.15	log value from GEO, segmented by DNAcopy/cbs
GSM322888	GSE12794	GPL7314	18922857	-0.15	0.15	log value from GEO, segmented by DNAcopy/cbs
GSM322889	GSE12794	GPL7314	18922857	-0.15	0.15	log value from GEO, segmented by DNAcopy/cbs
GSM322890	GSE12794	GPL7314	18922857	-0.15	0.15	log value from GEO, segmented by DNAcopy/cbs
GSM322891	GSE12794	GPL7314	18922857	-0.15	0.15	log value from GEO, segmented by DNAcopy/cbs
GSM322892	GSE12794	GPL7314	18922857	-0.15	0.15	log value from GEO, segmented by DNAcopy/cbs
GSM322893	GSE12794	GPL7314	18922857	-0.15	0.15	log value from GEO, segmented by DNAcopy/cbs
GSM322894	GSE12794	GPL7314	18922857	-0.15	0.15	log value from GEO, segmented by DNAcopy/cbs
GSM322895	GSE12794	GPL7314	18922857	-0.15	0.15	log value from GEO, segmented by DNAcopy/cbs
GSM322896	GSE12794	GPL7314	18922857	-0.15	0.15	log value from GEO, segmented by DNAcopy/cbs
GSM322897	GSE12794	GPL7314	18922857	-0.15	0.15	log value from GEO, segmented by DNAcopy/cbs
GSM322898	GSE12794	GPL7314	18922857	-0.15	0.15	log value from GEO, segmented by DNAcopy/cbs
GSM322899	GSE12794	GPL7314	18922857	-0.15	0.15	log value from GEO, segmented by DNAcopy/cbs
GSM322900	GSE12794	GPL7314	18922857	-0.15	0.15	log value from GEO, segmented by DNAcopy/cbs
GSM322901	GSE12794	GPL7314	18922857	-0.15	0.15	log value from GEO, segmented by DNAcopy/cbs
GSM322902	GSE12794	GPL7314	18922857	-0.15	0.15	log value from GEO, segmented by DNAcopy/cbs
GSM322903	GSE12794	GPL7314	18922857	-0.15	0.15	log value from GEO, segmented by DNAcopy/cbs
GSM322904	GSE12794	GPL7314	18922857	-0.15	0.15	log value from GEO, segmented by DNAcopy/cbs
GSM322905	GSE12794	GPL7314	18922857	-0.15	0.15	log value from GEO, segmented by DNAcopy/cbs
GSM322906	GSE12794	GPL7314	18922857	-0.15	0.15	log value from GEO, segmented by DNAcopy/cbs
GSM322907	GSE12794	GPL7314	18922857	-0.15	0.15	log value from GEO, segmented by DNAcopy/cbs
GSM322908	GSE12794	GPL7314	18922857	-0.15	0.15	log value from GEO, segmented by DNAcopy/cbs
GSM322909	GSE12794	GPL7314	18922857	-0.15	0.15	log value from GEO, segmented by DNAcopy/cbs
GSM322910	GSE12794	GPL7314	18922857	-0.15	0.15	log value from GEO, segmented by DNAcopy/cbs
GSM322911	GSE12794	GPL7314	18922857	-0.15	0.15	log value from GEO, segmented by DNAcopy/cbs
GSM322912	GSE12794	GPL7314	18922857	-0.15	0.15	log value from GEO, segmented by DNAcopy/cbs
GSM322913	GSE12794	GPL7314	18922857	-0.15	0.15	log value from GEO, segmented by DNAcopy/cbs
GSM322914	GSE12794	GPL7314	18922857	-0.15	0.15	log value from GEO, segmented by DNAcopy/cbs
GSM322915	GSE12794	GPL7314	18922857	-0.15	0.15	log value from GEO, segmented by DNAcopy/cbs
GSM322916	GSE12794	GPL7314	18922857	-0.15	0.15	log value from GEO, segmented by DNAcopy/cbs
GSM322917	GSE12794	GPL7314	18922857	-0.15	0.15	log value from GEO, segmented by DNAcopy/cbs
GSM322918	GSE12794	GPL7314	18922857	-0.15	0.15	log value from GEO, segmented by DNAcopy/cbs
GSM322919	GSE12794	GPL7314	18922857	-0.15	0.15	log value from GEO, segmented by DNAcopy/cbs
GSM322920	GSE12794	GPL7314	18922857	-0.15	0.15	log value from GEO, segmented by DNAcopy/cbs
GSM322921	GSE12794	GPL7314	18922857	-0.15	0.15	log value from GEO, segmented by DNAcopy/cbs
GSM322922	GSE12794	GPL7314	18922857	-0.15	0.15	log value from GEO, segmented by DNAcopy/cbs
GSM322923	GSE12794	GPL7314	18922857	-0.15	0.15	log value from GEO, segmented by DNAcopy/cbs
GSM322924	GSE12794	GPL7314	18922857	-0.15	0.15	log value from GEO, segmented by DNAcopy/cbs
GSM322925	GSE12794	GPL7314	18922857	-0.15	0.15	log value from GEO, segmented by DNAcopy/cbs
GSM322063	GSE12830	GPL4091	19286668	-0.5	0.5	log value from GEO, segmented by DNAcopy/cbs
GSM322064	GSE12830	GPL4544	19286668	-0.5	0.5	log value from GEO, segmented by DNAcopy/cbs
GSM322071	GSE12830	GPL4544	19286668	-0.5	0.5	log value from GEO, segmented by DNAcopy/cbs
GSM322072	GSE12830	GPL4544	19286668	-0.5	0.5	log value from GEO, segmented by DNAcopy/cbs
GSM322073	GSE12830	GPL4544	19286668	-0.5	0.5	log value from GEO, segmented by DNAcopy/cbs
GSM322074	GSE12830	GPL4544	19286668	-0.5	0.5	log value from GEO, segmented by DNAcopy/cbs
GSM322075	GSE12830	GPL4544	19286668	-0.5	0.5	log value from GEO, segmented by DNAcopy/cbs
GSM322076	GSE12830	GPL4091	19286668	-0.5	0.5	log value from GEO, segmented by DNAcopy/cbs
GSM322077	GSE12830	GPL4091	19286668	-0.5	0.5	log value from GEO, segmented by DNAcopy/cbs
GSM322078	GSE12830	GPL4091	19286668	-0.5	0.5	log value from GEO, segmented by DNAcopy/cbs
GSM322079	GSE12830	GPL4091	19286668	-0.5	0.5	log value from GEO, segmented by DNAcopy/cbs
GSM322086	GSE12830	GPL4091	19286668	-0.5	0.5	log value from GEO, segmented by DNAcopy/cbs
GSM322087	GSE12830	GPL4091	19286668	-0.5	0.5	log value from GEO, segmented by DNAcopy/cbs
GSM322088	GSE12830	GPL4091	19286668	-0.5	0.5	log value from GEO, segmented by DNAcopy/cbs
GSM322089	GSE12830	GPL4091	19286668	-0.5	0.5	log value from GEO, segmented by DNAcopy/cbs
GSM322090	GSE12830	GPL4091	19286668	-0.5	0.5	log value from GEO, segmented by DNAcopy/cbs
GSM322091	GSE12830	GPL4091	19286668	-0.5	0.5	log value from GEO, segmented by DNAcopy/cbs
GSM322092	GSE12830	GPL4091	19286668	-0.5	0.5	log value from GEO, segmented by DNAcopy/cbs
GSM322093	GSE12830	GPL4091	19286668	-0.5	0.5	log value from GEO, segmented by DNAcopy/cbs
GSM322094	GSE12830	GPL4091	19286668	-0.5	0.5	log value from GEO, segmented by DNAcopy/cbs
GSM325142	GSE12902	GPL4012	18832135	-0.15	0.15	log value from GEO, segmented by DNAcopy/cbs
GSM325143	GSE12902	GPL4012	18832135	-0.15	0.15	log value from GEO, segmented by DNAcopy/cbs
GSM325144	GSE12902	GPL4012	18832135	-0.15	0.15	log value from GEO, segmented by DNAcopy/cbs
GSM325145	GSE12902	GPL4012	18832135	-0.15	0.15	log value from GEO, segmented by DNAcopy/cbs
GSM325146	GSE12902	GPL4012	18832135	-0.15	0.15	log value from GEO, segmented by DNAcopy/cbs
GSM325147	GSE12902	GPL4012	18832135	-0.15	0.15	log value from GEO, segmented by DNAcopy/cbs
GSM325148	GSE12902	GPL4012	18832135	-0.15	0.15	log value from GEO, segmented by DNAcopy/cbs
GSM325149	GSE12902	GPL4012	18832135	-0.15	0.15	log value from GEO, segmented by DNAcopy/cbs
GSM325150	GSE12902	GPL4012	18832135	-0.15	0.15	log value from GEO, segmented by DNAcopy/cbs
GSM325151	GSE12902	GPL4012	18832135	-0.15	0.15	log value from GEO, segmented by DNAcopy/cbs
GSM325152	GSE12902	GPL4012	18832135	-0.15	0.15	log value from GEO, segmented by DNAcopy/cbs
GSM325153	GSE12902	GPL4012	18832135	-0.15	0.15	log value from GEO, segmented by DNAcopy/cbs
GSM325154	GSE12902	GPL4012	18832135	-0.15	0.15	log value from GEO, segmented by DNAcopy/cbs
GSM325155	GSE12902	GPL4012	18832135	-0.15	0.15	log value from GEO, segmented by DNAcopy/cbs
GSM325156	GSE12902	GPL4012	18832135	-0.15	0.15	log value from GEO, segmented by DNAcopy/cbs
GSM325157	GSE12902	GPL4012	18832135	-0.15	0.15	log value from GEO, segmented by DNAcopy/cbs
GSM325158	GSE12902	GPL4012	18832135	-0.15	0.15	log value from GEO, segmented by DNAcopy/cbs
GSM325159	GSE12902	GPL4012	18832135	-0.15	0.15	log value from GEO, segmented by DNAcopy/cbs
GSM325160	GSE12902	GPL4012	18832135	-0.15	0.15	log value from GEO, segmented by DNAcopy/cbs
GSM325161	GSE12902	GPL4012	18832135	-0.15	0.15	log value from GEO, segmented by DNAcopy/cbs
GSM325163	GSE12902	GPL4012	18832135	-0.15	0.15	log value from GEO, segmented by DNAcopy/cbs
GSM325164	GSE12902	GPL4012	18832135	-0.15	0.15	log value from GEO, segmented by DNAcopy/cbs
GSM322176	GSE12928	GPL5477	19563644	-0.7	0.7	log value from GEO, segmented by DNAcopy/cbs
GSM322179	GSE12928	GPL5477	19563644	-0.7	0.7	log value from GEO, segmented by DNAcopy/cbs
GSM324777	GSE12951	GPL5477	19147580	-0.15	0.15	log value from GEO, segmented by DNAcopy/cbs
GSM324795	GSE12951	GPL2843	19147580	-0.15	0.15	log value from GEO, segmented by DNAcopy/cbs
GSM324798	GSE12951	GPL2843	19147580	-0.15	0.15	log value from GEO, segmented by DNAcopy/cbs
GSM324801	GSE12951	GPL2843	19147580	-0.15	0.15	log value from GEO, segmented by DNAcopy/cbs
GSM324805	GSE12951	GPL2843	19147580	-0.15	0.15	log value from GEO, segmented by DNAcopy/cbs
GSM324806	GSE12951	GPL2843	19147580	-0.15	0.15	log value from GEO, segmented by DNAcopy/cbs
GSM324810	GSE12951	GPL2843	19147580	-0.15	0.15	log value from GEO, segmented by DNAcopy/cbs
GSM324812	GSE12951	GPL2843	19147580	-0.15	0.15	log value from GEO, segmented by DNAcopy/cbs
GSM324813	GSE12951	GPL2843	19147580	-0.15	0.15	log value from GEO, segmented by DNAcopy/cbs
GSM324814	GSE12951	GPL2843	19147580	-0.15	0.15	log value from GEO, segmented by DNAcopy/cbs
GSM324815	GSE12951	GPL2843	19147580	-0.15	0.15	log value from GEO, segmented by DNAcopy/cbs
GSM324816	GSE12951	GPL2843	19147580	-0.15	0.15	log value from GEO, segmented by DNAcopy/cbs
GSM324817	GSE12951	GPL2843	19147580	-0.15	0.15	log value from GEO, segmented by DNAcopy/cbs
GSM324818	GSE12951	GPL2843	19147580	-0.15	0.15	log value from GEO, segmented by DNAcopy/cbs
GSM324871	GSE12951	GPL2843	19147580	-0.15	0.15	log value from GEO, segmented by DNAcopy/cbs
GSM324872	GSE12951	GPL2843	19147580	-0.15	0.15	log value from GEO, segmented by DNAcopy/cbs
GSM324873	GSE12951	GPL2843	19147580	-0.15	0.15	log value from GEO, segmented by DNAcopy/cbs
GSM324874	GSE12951	GPL2843	19147580	-0.15	0.15	log value from GEO, segmented by DNAcopy/cbs
GSM324875	GSE12951	GPL7394	19147580	-0.15	0.15	log value from GEO, segmented by DNAcopy/cbs
GSM324876	GSE12951	GPL7394	19147580	-0.15	0.15	log value from GEO, segmented by DNAcopy/cbs
GSM324877	GSE12951	GPL7394	19147580	-0.15	0.15	log value from GEO, segmented by DNAcopy/cbs
GSM324880	GSE12951	GPL7394	19147580	-0.15	0.15	log value from GEO, segmented by DNAcopy/cbs
GSM324881	GSE12951	GPL7394	19147580	-0.15	0.15	log value from GEO, segmented by DNAcopy/cbs
GSM324882	GSE12951	GPL7394	19147580	-0.15	0.15	log value from GEO, segmented by DNAcopy/cbs
GSM324883	GSE12951	GPL7394	19147580	-0.15	0.15	log value from GEO, segmented by DNAcopy/cbs
GSM324884	GSE12951	GPL7394	19147580	-0.15	0.15	log value from GEO, segmented by DNAcopy/cbs
GSM324885	GSE12951	GPL7394	19147580	-0.15	0.15	log value from GEO, segmented by DNAcopy/cbs
GSM324886	GSE12951	GPL7394	19147580	-0.15	0.15	log value from GEO, segmented by DNAcopy/cbs
GSM324920	GSE12958	GPL5477	19147580	-0.15	0.15	log value from GEO, segmented by DNAcopy/cbs
GSM324923	GSE12958	GPL5477	19147580	-0.15	0.15	log value from GEO, segmented by DNAcopy/cbs
GSM332890	GSE13191	GPL2819	19208797	-0.15	0.15	log value from GEO, segmented by DNAcopy/cbs
GSM332891	GSE13191	GPL2819	19208797	-0.15	0.15	log value from GEO, segmented by DNAcopy/cbs
GSM332892	GSE13191	GPL2819	19208797	-0.15	0.15	log value from GEO, segmented by DNAcopy/cbs
GSM332894	GSE13191	GPL2819	19208797	-0.15	0.15	log value from GEO, segmented by DNAcopy/cbs
GSM332896	GSE13191	GPL2819	19208797	-0.15	0.15	log value from GEO, segmented by DNAcopy/cbs
GSM332912	GSE13191	GPL2819	19208797	-0.15	0.15	log value from GEO, segmented by DNAcopy/cbs
GSM332967	GSE13191	GPL2819	19208797	-0.15	0.15	log value from GEO, segmented by DNAcopy/cbs
GSM332991	GSE13191	GPL2819	19208797	-0.15	0.15	log value from GEO, segmented by DNAcopy/cbs
GSM332992	GSE13191	GPL2819	19208797	-0.15	0.15	log value from GEO, segmented by DNAcopy/cbs
GSM332993	GSE13191	GPL2819	19208797	-0.15	0.15	log value from GEO, segmented by DNAcopy/cbs
GSM332994	GSE13191	GPL2819	19208797	-0.15	0.15	log value from GEO, segmented by DNAcopy/cbs
GSM332995	GSE13191	GPL2819	19208797	-0.15	0.15	log value from GEO, segmented by DNAcopy/cbs
GSM332996	GSE13191	GPL2819	19208797	-0.15	0.15	log value from GEO, segmented by DNAcopy/cbs
GSM332997	GSE13191	GPL2819	19208797	-0.15	0.15	log value from GEO, segmented by DNAcopy/cbs
GSM332998	GSE13191	GPL2819	19208797	-0.15	0.15	log value from GEO, segmented by DNAcopy/cbs
GSM332999	GSE13191	GPL2819	19208797	-0.15	0.15	log value from GEO, segmented by DNAcopy/cbs
GSM333000	GSE13191	GPL2819	19208797	-0.15	0.15	log value from GEO, segmented by DNAcopy/cbs
GSM333002	GSE13191	GPL2819	19208797	-0.15	0.15	log value from GEO, segmented by DNAcopy/cbs
GSM333003	GSE13191	GPL2819	19208797	-0.15	0.15	log value from GEO, segmented by DNAcopy/cbs
GSM333039	GSE13191	GPL2819	19208797	-0.15	0.15	log value from GEO, segmented by DNAcopy/cbs
GSM333040	GSE13191	GPL2819	19208797	-0.15	0.15	log value from GEO, segmented by DNAcopy/cbs
GSM333041	GSE13191	GPL2819	19208797	-0.15	0.15	log value from GEO, segmented by DNAcopy/cbs
GSM333042	GSE13191	GPL2819	19208797	-0.15	0.15	log value from GEO, segmented by DNAcopy/cbs
GSM333043	GSE13191	GPL2819	19208797	-0.15	0.15	log value from GEO, segmented by DNAcopy/cbs
GSM333044	GSE13191	GPL2819	19208797	-0.15	0.15	log value from GEO, segmented by DNAcopy/cbs
GSM333045	GSE13191	GPL2819	19208797	-0.15	0.15	log value from GEO, segmented by DNAcopy/cbs
GSM333046	GSE13191	GPL2819	19208797	-0.15	0.15	log value from GEO, segmented by DNAcopy/cbs
GSM333116	GSE13191	GPL3055	19208797	-0.15	0.15	log value from GEO, segmented by DNAcopy/cbs
GSM333117	GSE13191	GPL3055	19208797	-0.15	0.15	log value from GEO, segmented by DNAcopy/cbs
GSM333156	GSE13191	GPL2819	19208797	-0.15	0.15	log value from GEO, segmented by DNAcopy/cbs
GSM334199	GSE13239	GPL2879	19020549	-0.15	0.15	log value from GEO, segmented by DNAcopy/cbs
GSM334200	GSE13239	GPL2879	19020549	-0.15	0.15	log value from GEO, segmented by DNAcopy/cbs
GSM334201	GSE13239	GPL2879	19020549	-0.15	0.15	log value from GEO, segmented by DNAcopy/cbs
GSM334202	GSE13239	GPL2879	19020549	-0.15	0.15	log value from GEO, segmented by DNAcopy/cbs
GSM334203	GSE13239	GPL2879	19020549	-0.15	0.15	log value from GEO, segmented by DNAcopy/cbs
GSM334204	GSE13239	GPL2879	19020549	-0.15	0.15	log value from GEO, segmented by DNAcopy/cbs
GSM334205	GSE13239	GPL2879	19020549	-0.15	0.15	log value from GEO, segmented by DNAcopy/cbs
GSM334206	GSE13239	GPL2879	19020549	-0.15	0.15	log value from GEO, segmented by DNAcopy/cbs
GSM334207	GSE13239	GPL2879	19020549	-0.15	0.15	log value from GEO, segmented by DNAcopy/cbs
GSM334208	GSE13239	GPL2879	19020549	-0.15	0.15	log value from GEO, segmented by DNAcopy/cbs
GSM334209	GSE13239	GPL2879	19020549	-0.15	0.15	log value from GEO, segmented by DNAcopy/cbs
GSM334210	GSE13239	GPL2879	19020549	-0.15	0.15	log value from GEO, segmented by DNAcopy/cbs
GSM334211	GSE13239	GPL2879	19020549	-0.15	0.15	log value from GEO, segmented by DNAcopy/cbs
GSM334212	GSE13239	GPL2879	19020549	-0.15	0.15	log value from GEO, segmented by DNAcopy/cbs
GSM334213	GSE13239	GPL2879	19020549	-0.15	0.15	log value from GEO, segmented by DNAcopy/cbs
GSM334214	GSE13239	GPL2879	19020549	-0.15	0.15	log value from GEO, segmented by DNAcopy/cbs
GSM334215	GSE13239	GPL2879	19020549	-0.15	0.15	log value from GEO, segmented by DNAcopy/cbs
GSM334216	GSE13239	GPL2879	19020549	-0.15	0.15	log value from GEO, segmented by DNAcopy/cbs
GSM334217	GSE13239	GPL2879	19020549	-0.15	0.15	log value from GEO, segmented by DNAcopy/cbs
GSM334218	GSE13239	GPL2879	19020549	-0.15	0.15	log value from GEO, segmented by DNAcopy/cbs
GSM334219	GSE13239	GPL2879	19020549	-0.15	0.15	log value from GEO, segmented by DNAcopy/cbs
GSM334220	GSE13239	GPL2879	19020549	-0.15	0.15	log value from GEO, segmented by DNAcopy/cbs
GSM334221	GSE13239	GPL2879	19020549	-0.15	0.15	log value from GEO, segmented by DNAcopy/cbs
GSM334222	GSE13239	GPL2879	19020549	-0.15	0.15	log value from GEO, segmented by DNAcopy/cbs
GSM334223	GSE13239	GPL2879	19020549	-0.15	0.15	log value from GEO, segmented by DNAcopy/cbs
GSM335288	GSE13282	GPL6982	19061835	-0.15	0.15	log value from GEO, segmented by DNAcopy/cbs
GSM335289	GSE13282	GPL6982	19061835	-0.15	0.15	log value from GEO, segmented by DNAcopy/cbs
GSM335290	GSE13282	GPL6982	19061835	-0.15	0.15	log value from GEO, segmented by DNAcopy/cbs
GSM335291	GSE13282	GPL6982	19061835	-0.15	0.15	log value from GEO, segmented by DNAcopy/cbs
GSM335292	GSE13282	GPL6982	19061835	-0.15	0.15	log value from GEO, segmented by DNAcopy/cbs
GSM335293	GSE13282	GPL6982	19061835	-0.15	0.15	log value from GEO, segmented by DNAcopy/cbs
GSM335294	GSE13282	GPL6982	19061835	-0.15	0.15	log value from GEO, segmented by DNAcopy/cbs
GSM335295	GSE13282	GPL6982	19061835	-0.15	0.15	log value from GEO, segmented by DNAcopy/cbs
GSM335296	GSE13282	GPL6982	19061835	-0.15	0.15	log value from GEO, segmented by DNAcopy/cbs
GSM335297	GSE13282	GPL6982	19061835	-0.15	0.15	log value from GEO, segmented by DNAcopy/cbs
GSM335298	GSE13282	GPL6982	19061835	-0.15	0.15	log value from GEO, segmented by DNAcopy/cbs
GSM335299	GSE13282	GPL6982	19061835	-0.15	0.15	log value from GEO, segmented by DNAcopy/cbs
GSM335300	GSE13282	GPL6982	19061835	-0.15	0.15	log value from GEO, segmented by DNAcopy/cbs
GSM335301	GSE13282	GPL6982	19061835	-0.15	0.15	log value from GEO, segmented by DNAcopy/cbs
GSM335302	GSE13282	GPL6982	19061835	-0.15	0.15	log value from GEO, segmented by DNAcopy/cbs
GSM335303	GSE13282	GPL6982	19061835	-0.15	0.15	log value from GEO, segmented by DNAcopy/cbs
GSM335304	GSE13282	GPL6982	19061835	-0.15	0.15	log value from GEO, segmented by DNAcopy/cbs
GSM335305	GSE13282	GPL6982	19061835	-0.15	0.15	log value from GEO, segmented by DNAcopy/cbs
GSM335306	GSE13282	GPL6982	19061835	-0.15	0.15	log value from GEO, segmented by DNAcopy/cbs
GSM335307	GSE13282	GPL6982	19061835	-0.15	0.15	log value from GEO, segmented by DNAcopy/cbs
GSM335308	GSE13282	GPL6982	19061835	-0.15	0.15	log value from GEO, segmented by DNAcopy/cbs
GSM238814	GSE13331	GPL2616		-0.15	0.15	log value from GEO, segmented by DNAcopy/cbs
GSM238836	GSE13331	GPL2616		-0.15	0.15	log value from GEO, segmented by DNAcopy/cbs
GSM238859	GSE13331	GPL2616		-0.15	0.15	log value from GEO, segmented by DNAcopy/cbs
GSM238866	GSE13331	GPL2616		-0.15	0.15	log value from GEO, segmented by DNAcopy/cbs
GSM238869	GSE13331	GPL2616		-0.15	0.15	log value from GEO, segmented by DNAcopy/cbs
GSM238876	GSE13331	GPL2616		-0.15	0.15	log value from GEO, segmented by DNAcopy/cbs
GSM238878	GSE13331	GPL2616		-0.15	0.15	log value from GEO, segmented by DNAcopy/cbs
GSM238879	GSE13331	GPL2616		-0.15	0.15	log value from GEO, segmented by DNAcopy/cbs
GSM238880	GSE13331	GPL2616		-0.15	0.15	log value from GEO, segmented by DNAcopy/cbs
GSM238936	GSE13331	GPL2616		-0.15	0.15	log value from GEO, segmented by DNAcopy/cbs
GSM238937	GSE13331	GPL2616		-0.15	0.15	log value from GEO, segmented by DNAcopy/cbs
GSM238938	GSE13331	GPL2616		-0.15	0.15	log value from GEO, segmented by DNAcopy/cbs
GSM238939	GSE13331	GPL2616		-0.15	0.15	log value from GEO, segmented by DNAcopy/cbs
GSM238940	GSE13331	GPL2616		-0.15	0.15	log value from GEO, segmented by DNAcopy/cbs
GSM238967	GSE13331	GPL2616		-0.15	0.15	log value from GEO, segmented by DNAcopy/cbs
GSM238974	GSE13331	GPL2616		-0.15	0.15	log value from GEO, segmented by DNAcopy/cbs
GSM238975	GSE13331	GPL2616		-0.15	0.15	log value from GEO, segmented by DNAcopy/cbs
GSM238976	GSE13331	GPL2616		-0.15	0.15	log value from GEO, segmented by DNAcopy/cbs
GSM238977	GSE13331	GPL2616		-0.15	0.15	log value from GEO, segmented by DNAcopy/cbs
GSM238978	GSE13331	GPL2616		-0.15	0.15	log value from GEO, segmented by DNAcopy/cbs
GSM238979	GSE13331	GPL2616		-0.15	0.15	log value from GEO, segmented by DNAcopy/cbs
GSM238980	GSE13331	GPL2616		-0.15	0.15	log value from GEO, segmented by DNAcopy/cbs
GSM238981	GSE13331	GPL2616		-0.15	0.15	log value from GEO, segmented by DNAcopy/cbs
GSM239517	GSE13331	GPL2616		-0.15	0.15	log value from GEO, segmented by DNAcopy/cbs
GSM239518	GSE13331	GPL2616		-0.15	0.15	log value from GEO, segmented by DNAcopy/cbs
GSM239519	GSE13331	GPL2616		-0.15	0.15	log value from GEO, segmented by DNAcopy/cbs
GSM239521	GSE13331	GPL2616		-0.15	0.15	log value from GEO, segmented by DNAcopy/cbs
GSM239522	GSE13331	GPL2616		-0.15	0.15	log value from GEO, segmented by DNAcopy/cbs
GSM239523	GSE13331	GPL2616		-0.15	0.15	log value from GEO, segmented by DNAcopy/cbs
GSM239524	GSE13331	GPL2616		-0.15	0.15	log value from GEO, segmented by DNAcopy/cbs
GSM239525	GSE13331	GPL2616		-0.15	0.15	log value from GEO, segmented by DNAcopy/cbs
GSM239526	GSE13331	GPL2616		-0.15	0.15	log value from GEO, segmented by DNAcopy/cbs
GSM239527	GSE13331	GPL2616		-0.15	0.15	log value from GEO, segmented by DNAcopy/cbs
GSM239528	GSE13331	GPL2616		-0.15	0.15	log value from GEO, segmented by DNAcopy/cbs
GSM239529	GSE13331	GPL2616		-0.15	0.15	log value from GEO, segmented by DNAcopy/cbs
GSM239530	GSE13331	GPL2616		-0.15	0.15	log value from GEO, segmented by DNAcopy/cbs
GSM239531	GSE13331	GPL2616		-0.15	0.15	log value from GEO, segmented by DNAcopy/cbs
GSM239532	GSE13331	GPL2616		-0.15	0.15	log value from GEO, segmented by DNAcopy/cbs
GSM239533	GSE13331	GPL2616		-0.15	0.15	log value from GEO, segmented by DNAcopy/cbs
GSM239534	GSE13331	GPL2616		-0.15	0.15	log value from GEO, segmented by DNAcopy/cbs
GSM239535	GSE13331	GPL2616		-0.15	0.15	log value from GEO, segmented by DNAcopy/cbs
GSM239536	GSE13331	GPL2616		-0.15	0.15	log value from GEO, segmented by DNAcopy/cbs
GSM239537	GSE13331	GPL2616		-0.15	0.15	log value from GEO, segmented by DNAcopy/cbs
GSM239562	GSE13331	GPL2616		-0.15	0.15	log value from GEO, segmented by DNAcopy/cbs
GSM239563	GSE13331	GPL2616		-0.15	0.15	log value from GEO, segmented by DNAcopy/cbs
GSM239564	GSE13331	GPL2616		-0.15	0.15	log value from GEO, segmented by DNAcopy/cbs
GSM239565	GSE13331	GPL2616		-0.15	0.15	log value from GEO, segmented by DNAcopy/cbs
GSM239566	GSE13331	GPL2616		-0.15	0.15	log value from GEO, segmented by DNAcopy/cbs
GSM239576	GSE13331	GPL2616		-0.15	0.15	log value from GEO, segmented by DNAcopy/cbs
GSM239579	GSE13331	GPL2616		-0.15	0.15	log value from GEO, segmented by DNAcopy/cbs
GSM239581	GSE13331	GPL2616		-0.15	0.15	log value from GEO, segmented by DNAcopy/cbs
GSM239582	GSE13331	GPL2616		-0.15	0.15	log value from GEO, segmented by DNAcopy/cbs
GSM336410	GSE13331	GPL4544		-0.15	0.15	log value from GEO, segmented by DNAcopy/cbs
GSM336412	GSE13331	GPL4544		-0.15	0.15	log value from GEO, segmented by DNAcopy/cbs
GSM322209	GSE13557	GPL4723	18484635	-0.2	0.2	log value from GEO, segmented by DNAcopy/cbs
GSM322210	GSE13557	GPL4723	18484635	-0.2	0.2	log value from GEO, segmented by DNAcopy/cbs
GSM322211	GSE13557	GPL4723	18484635	-0.2	0.2	log value from GEO, segmented by DNAcopy/cbs
GSM322212	GSE13557	GPL4723	18484635	-0.2	0.2	log value from GEO, segmented by DNAcopy/cbs
GSM322213	GSE13557	GPL4723	18484635	-0.2	0.2	log value from GEO, segmented by DNAcopy/cbs
GSM322214	GSE13557	GPL4723	18484635	-0.2	0.2	log value from GEO, segmented by DNAcopy/cbs
GSM322215	GSE13557	GPL4723	18484635	-0.2	0.2	log value from GEO, segmented by DNAcopy/cbs
GSM322216	GSE13557	GPL4723	18484635	-0.2	0.2	log value from GEO, segmented by DNAcopy/cbs
GSM322217	GSE13557	GPL4723	18484635	-0.2	0.2	log value from GEO, segmented by DNAcopy/cbs
GSM322218	GSE13557	GPL4723	18484635	-0.2	0.2	log value from GEO, segmented by DNAcopy/cbs
GSM322220	GSE13557	GPL6980	18484635	-0.2	0.2	log value from GEO, segmented by DNAcopy/cbs
GSM322221	GSE13557	GPL6980	18484635	-0.2	0.2	log value from GEO, segmented by DNAcopy/cbs
GSM322222	GSE13557	GPL6980	18484635	-0.2	0.2	log value from GEO, segmented by DNAcopy/cbs
GSM322223	GSE13557	GPL6980	18484635	-0.2	0.2	log value from GEO, segmented by DNAcopy/cbs
GSM322224	GSE13557	GPL6980	18484635	-0.2	0.2	log value from GEO, segmented by DNAcopy/cbs
GSM322225	GSE13557	GPL6980	18484635	-0.2	0.2	log value from GEO, segmented by DNAcopy/cbs
GSM322226	GSE13557	GPL6980	18484635	-0.2	0.2	log value from GEO, segmented by DNAcopy/cbs
GSM322227	GSE13557	GPL6980	18484635	-0.2	0.2	log value from GEO, segmented by DNAcopy/cbs
GSM322228	GSE13557	GPL6980	18484635	-0.2	0.2	log value from GEO, segmented by DNAcopy/cbs
GSM322229	GSE13557	GPL6980	18484635	-0.2	0.2	log value from GEO, segmented by DNAcopy/cbs
GSM323871	GSE13557	GPL5149	18484635	-0.2	0.2	log value from GEO, segmented by DNAcopy/cbs
GSM323872	GSE13557	GPL5149	18484635	-0.2	0.2	log value from GEO, segmented by DNAcopy/cbs
GSM323873	GSE13557	GPL5149	18484635	-0.2	0.2	log value from GEO, segmented by DNAcopy/cbs
GSM323874	GSE13557	GPL5149	18484635	-0.2	0.2	log value from GEO, segmented by DNAcopy/cbs
GSM323875	GSE13557	GPL5149	18484635	-0.2	0.2	log value from GEO, segmented by DNAcopy/cbs
GSM323876	GSE13557	GPL5149	18484635	-0.2	0.2	log value from GEO, segmented by DNAcopy/cbs
GSM323877	GSE13557	GPL5149	18484635	-0.2	0.2	log value from GEO, segmented by DNAcopy/cbs
GSM323878	GSE13557	GPL5149	18484635	-0.2	0.2	log value from GEO, segmented by DNAcopy/cbs
GSM323879	GSE13557	GPL5149	18484635	-0.2	0.2	log value from GEO, segmented by DNAcopy/cbs
GSM323880	GSE13557	GPL5149	18484635	-0.2	0.2	log value from GEO, segmented by DNAcopy/cbs
GSM346703	GSE13775	GPL4723	19290004	-0.2	0.2	log value from GEO, segmented by DNAcopy/cbs
GSM346704	GSE13775	GPL4723	19290004	-0.2	0.2	log value from GEO, segmented by DNAcopy/cbs
GSM346705	GSE13775	GPL4723	19290004	-0.2	0.2	log value from GEO, segmented by DNAcopy/cbs
GSM346706	GSE13775	GPL4723	19290004	-0.2	0.2	log value from GEO, segmented by DNAcopy/cbs
GSM346707	GSE13775	GPL4723	19290004	-0.2	0.2	log value from GEO, segmented by DNAcopy/cbs
GSM346708	GSE13775	GPL4723	19290004	-0.2	0.2	log value from GEO, segmented by DNAcopy/cbs
GSM346709	GSE13775	GPL4723	19290004	-0.2	0.2	log value from GEO, segmented by DNAcopy/cbs
GSM346710	GSE13775	GPL4723	19290004	-0.2	0.2	log value from GEO, segmented by DNAcopy/cbs
GSM346711	GSE13775	GPL4723	19290004	-0.2	0.2	log value from GEO, segmented by DNAcopy/cbs
GSM346712	GSE13775	GPL4723	19290004	-0.2	0.2	log value from GEO, segmented by DNAcopy/cbs
GSM346713	GSE13775	GPL4723	19290004	-0.2	0.2	log value from GEO, segmented by DNAcopy/cbs
GSM346714	GSE13775	GPL4723	19290004	-0.2	0.2	log value from GEO, segmented by DNAcopy/cbs
GSM346715	GSE13775	GPL4723	19290004	-0.2	0.2	log value from GEO, segmented by DNAcopy/cbs
GSM346716	GSE13775	GPL4723	19290004	-0.2	0.2	log value from GEO, segmented by DNAcopy/cbs
GSM346717	GSE13775	GPL4723	19290004	-0.2	0.2	log value from GEO, segmented by DNAcopy/cbs
GSM346718	GSE13775	GPL4723	19290004	-0.2	0.2	log value from GEO, segmented by DNAcopy/cbs
GSM346719	GSE13775	GPL4723	19290004	-0.2	0.2	log value from GEO, segmented by DNAcopy/cbs
GSM346720	GSE13775	GPL4723	19290004	-0.2	0.2	log value from GEO, segmented by DNAcopy/cbs
GSM346721	GSE13775	GPL4723	19290004	-0.2	0.2	log value from GEO, segmented by DNAcopy/cbs
GSM346722	GSE13775	GPL4723	19290004	-0.2	0.2	log value from GEO, segmented by DNAcopy/cbs
GSM346723	GSE13775	GPL4723	19290004	-0.2	0.2	log value from GEO, segmented by DNAcopy/cbs
GSM346724	GSE13775	GPL4723	19290004	-0.2	0.2	log value from GEO, segmented by DNAcopy/cbs
GSM346725	GSE13775	GPL4723	19290004	-0.2	0.2	log value from GEO, segmented by DNAcopy/cbs
GSM346726	GSE13775	GPL4723	19290004	-0.2	0.2	log value from GEO, segmented by DNAcopy/cbs
GSM346727	GSE13775	GPL4723	19290004	-0.2	0.2	log value from GEO, segmented by DNAcopy/cbs
GSM346728	GSE13775	GPL4723	19290004	-0.2	0.2	log value from GEO, segmented by DNAcopy/cbs
GSM346729	GSE13775	GPL4723	19290004	-0.2	0.2	log value from GEO, segmented by DNAcopy/cbs
GSM346730	GSE13775	GPL4723	19290004	-0.2	0.2	log value from GEO, segmented by DNAcopy/cbs
GSM346731	GSE13775	GPL4723	19290004	-0.2	0.2	log value from GEO, segmented by DNAcopy/cbs
GSM346732	GSE13775	GPL4723	19290004	-0.2	0.2	log value from GEO, segmented by DNAcopy/cbs
GSM346733	GSE13775	GPL4723	19290004	-0.2	0.2	log value from GEO, segmented by DNAcopy/cbs
GSM346734	GSE13775	GPL4723	19290004	-0.2	0.2	log value from GEO, segmented by DNAcopy/cbs
GSM346735	GSE13775	GPL4723	19290004	-0.2	0.2	log value from GEO, segmented by DNAcopy/cbs
GSM346736	GSE13775	GPL4723	19290004	-0.2	0.2	log value from GEO, segmented by DNAcopy/cbs
GSM346737	GSE13775	GPL4723	19290004	-0.2	0.2	log value from GEO, segmented by DNAcopy/cbs
GSM346738	GSE13775	GPL4723	19290004	-0.2	0.2	log value from GEO, segmented by DNAcopy/cbs
GSM346739	GSE13775	GPL4723	19290004	-0.2	0.2	log value from GEO, segmented by DNAcopy/cbs
GSM346740	GSE13775	GPL4723	19290004	-0.2	0.2	log value from GEO, segmented by DNAcopy/cbs
GSM346741	GSE13775	GPL4723	19290004	-0.2	0.2	log value from GEO, segmented by DNAcopy/cbs
GSM346742	GSE13775	GPL4723	19290004	-0.2	0.2	log value from GEO, segmented by DNAcopy/cbs
GSM346743	GSE13775	GPL4723	19290004	-0.2	0.2	log value from GEO, segmented by DNAcopy/cbs
GSM346744	GSE13775	GPL4723	19290004	-0.2	0.2	log value from GEO, segmented by DNAcopy/cbs
GSM346745	GSE13775	GPL4723	19290004	-0.2	0.2	log value from GEO, segmented by DNAcopy/cbs
GSM346746	GSE13775	GPL4723	19290004	-0.2	0.2	log value from GEO, segmented by DNAcopy/cbs
GSM346747	GSE13775	GPL4723	19290004	-0.2	0.2	log value from GEO, segmented by DNAcopy/cbs
GSM346748	GSE13775	GPL4723	19290004	-0.2	0.2	log value from GEO, segmented by DNAcopy/cbs
GSM346749	GSE13775	GPL4723	19290004	-0.2	0.2	log value from GEO, segmented by DNAcopy/cbs
GSM346750	GSE13775	GPL4723	19290004	-0.2	0.2	log value from GEO, segmented by DNAcopy/cbs
GSM346751	GSE13775	GPL4723	19290004	-0.2	0.2	log value from GEO, segmented by DNAcopy/cbs
GSM352397	GSE14109	GPL7823	20003513	-0.1	0.1	log value from GEO, segmented by DNAcopy/cbs
GSM353502	GSE14109	GPL7823	20003513	-0.1	0.1	log value from GEO, segmented by DNAcopy/cbs
GSM353512	GSE14109	GPL7823	20003513	-0.1	0.1	log value from GEO, segmented by DNAcopy/cbs
GSM353514	GSE14109	GPL7823	20003513	-0.1	0.1	log value from GEO, segmented by DNAcopy/cbs
GSM353575	GSE14109	GPL7823	20003513	-0.1	0.1	log value from GEO, segmented by DNAcopy/cbs
GSM353576	GSE14109	GPL7823	20003513	-0.1	0.1	log value from GEO, segmented by DNAcopy/cbs
GSM353577	GSE14109	GPL7823	20003513	-0.1	0.1	log value from GEO, segmented by DNAcopy/cbs
GSM353597	GSE14109	GPL7823	20003513	-0.1	0.1	log value from GEO, segmented by DNAcopy/cbs
GSM353598	GSE14109	GPL7823	20003513	-0.1	0.1	log value from GEO, segmented by DNAcopy/cbs
GSM353599	GSE14109	GPL7823	20003513	-0.1	0.1	log value from GEO, segmented by DNAcopy/cbs
GSM353600	GSE14109	GPL7823	20003513	-0.1	0.1	log value from GEO, segmented by DNAcopy/cbs
GSM353979	GSE14109	GPL7823	20003513	-0.1	0.1	log value from GEO, segmented by DNAcopy/cbs
GSM353980	GSE14109	GPL7823	20003513	-0.1	0.1	log value from GEO, segmented by DNAcopy/cbs
GSM353981	GSE14109	GPL7823	20003513	-0.1	0.1	log value from GEO, segmented by DNAcopy/cbs
GSM353982	GSE14109	GPL7823	20003513	-0.1	0.1	log value from GEO, segmented by DNAcopy/cbs
GSM353985	GSE14109	GPL7823	20003513	-0.1	0.1	log value from GEO, segmented by DNAcopy/cbs
GSM353986	GSE14109	GPL7823	20003513	-0.1	0.1	log value from GEO, segmented by DNAcopy/cbs
GSM353987	GSE14109	GPL7823	20003513	-0.1	0.1	log value from GEO, segmented by DNAcopy/cbs
GSM353988	GSE14109	GPL7823	20003513	-0.1	0.1	log value from GEO, segmented by DNAcopy/cbs
GSM353989	GSE14109	GPL7823	20003513	-0.1	0.1	log value from GEO, segmented by DNAcopy/cbs
GSM353990	GSE14109	GPL7823	20003513	-0.1	0.1	log value from GEO, segmented by DNAcopy/cbs
GSM353993	GSE14109	GPL7823	20003513	-0.1	0.1	log value from GEO, segmented by DNAcopy/cbs
GSM353996	GSE14109	GPL7823	20003513	-0.1	0.1	log value from GEO, segmented by DNAcopy/cbs
GSM353997	GSE14109	GPL7823	20003513	-0.1	0.1	log value from GEO, segmented by DNAcopy/cbs
GSM353998	GSE14109	GPL7823	20003513	-0.1	0.1	log value from GEO, segmented by DNAcopy/cbs
GSM353999	GSE14109	GPL7823	20003513	-0.1	0.1	log value from GEO, segmented by DNAcopy/cbs
GSM354001	GSE14109	GPL7823	20003513	-0.1	0.1	log value from GEO, segmented by DNAcopy/cbs
GSM354002	GSE14109	GPL7823	20003513	-0.1	0.1	log value from GEO, segmented by DNAcopy/cbs
GSM354003	GSE14109	GPL7823	20003513	-0.1	0.1	log value from GEO, segmented by DNAcopy/cbs
GSM354005	GSE14109	GPL2873	20003513	-0.1	0.1	log value from GEO, segmented by DNAcopy/cbs
GSM354006	GSE14109	GPL2873	20003513	-0.1	0.1	log value from GEO, segmented by DNAcopy/cbs
GSM354007	GSE14109	GPL7823	20003513	-0.1	0.1	log value from GEO, segmented by DNAcopy/cbs
GSM354008	GSE14109	GPL7823	20003513	-0.1	0.1	log value from GEO, segmented by DNAcopy/cbs
GSM368465	GSE14803	GPL5114	20155841	-0.25	0.25	log value from GEO, segmented by DNAcopy/cbs
GSM368466	GSE14803	GPL5114	20155841	-0.25	0.25	log value from GEO, segmented by DNAcopy/cbs
GSM368475	GSE14803	GPL5114	20155841	-0.25	0.25	log value from GEO, segmented by DNAcopy/cbs
GSM368476	GSE14803	GPL5114	20155841	-0.25	0.25	log value from GEO, segmented by DNAcopy/cbs
GSM368477	GSE14803	GPL5114	20155841	-0.25	0.25	log value from GEO, segmented by DNAcopy/cbs
GSM368478	GSE14803	GPL5114	20155841	-0.25	0.25	log value from GEO, segmented by DNAcopy/cbs
GSM368479	GSE14803	GPL5114	20155841	-0.25	0.25	log value from GEO, segmented by DNAcopy/cbs
GSM368480	GSE14803	GPL5114	20155841	-0.25	0.25	log value from GEO, segmented by DNAcopy/cbs
GSM368481	GSE14803	GPL5114	20155841	-0.25	0.25	log value from GEO, segmented by DNAcopy/cbs
GSM368482	GSE14803	GPL5114	20155841	-0.25	0.25	log value from GEO, segmented by DNAcopy/cbs
GSM368483	GSE14803	GPL5114	20155841	-0.25	0.25	log value from GEO, segmented by DNAcopy/cbs
GSM454659	GSE14803	GPL5114	20155841	-0.25	0.25	log value from GEO, segmented by DNAcopy/cbs
GSM454660	GSE14803	GPL5114	20155841	-0.25	0.25	log value from GEO, segmented by DNAcopy/cbs
GSM454661	GSE14803	GPL5114	20155841	-0.25	0.25	log value from GEO, segmented by DNAcopy/cbs
GSM454662	GSE14803	GPL5114	20155841	-0.25	0.25	log value from GEO, segmented by DNAcopy/cbs
GSM371040	GSE14819	GPL8175	19861460	-0.15	0.15	log value from GEO, segmented by DNAcopy/cbs
GSM371041	GSE14819	GPL8175	19861460	-0.15	0.15	log value from GEO, segmented by DNAcopy/cbs
GSM371042	GSE14819	GPL8175	19861460	-0.15	0.15	log value from GEO, segmented by DNAcopy/cbs
GSM371043	GSE14819	GPL8175	19861460	-0.15	0.15	log value from GEO, segmented by DNAcopy/cbs
GSM371044	GSE14819	GPL8175	19861460	-0.15	0.15	log value from GEO, segmented by DNAcopy/cbs
GSM371045	GSE14819	GPL8175	19861460	-0.15	0.15	log value from GEO, segmented by DNAcopy/cbs
GSM371046	GSE14819	GPL8175	19861460	-0.15	0.15	log value from GEO, segmented by DNAcopy/cbs
GSM371047	GSE14819	GPL8175	19861460	-0.15	0.15	log value from GEO, segmented by DNAcopy/cbs
GSM371048	GSE14819	GPL8175	19861460	-0.15	0.15	log value from GEO, segmented by DNAcopy/cbs
GSM371049	GSE14819	GPL8175	19861460	-0.15	0.15	log value from GEO, segmented by DNAcopy/cbs
GSM371050	GSE14819	GPL8175	19861460	-0.15	0.15	log value from GEO, segmented by DNAcopy/cbs
GSM371051	GSE14819	GPL8175	19861460	-0.15	0.15	log value from GEO, segmented by DNAcopy/cbs
GSM371052	GSE14819	GPL8175	19861460	-0.15	0.15	log value from GEO, segmented by DNAcopy/cbs
GSM371053	GSE14819	GPL8175	19861460	-0.15	0.15	log value from GEO, segmented by DNAcopy/cbs
GSM371054	GSE14819	GPL8175	19861460	-0.15	0.15	log value from GEO, segmented by DNAcopy/cbs
GSM371055	GSE14819	GPL8175	19861460	-0.15	0.15	log value from GEO, segmented by DNAcopy/cbs
GSM371056	GSE14819	GPL8175	19861460	-0.15	0.15	log value from GEO, segmented by DNAcopy/cbs
GSM371057	GSE14819	GPL8175	19861460	-0.15	0.15	log value from GEO, segmented by DNAcopy/cbs
GSM371058	GSE14819	GPL8175	19861460	-0.15	0.15	log value from GEO, segmented by DNAcopy/cbs
GSM371059	GSE14819	GPL8175	19861460	-0.15	0.15	log value from GEO, segmented by DNAcopy/cbs
GSM371060	GSE14819	GPL8175	19861460	-0.15	0.15	log value from GEO, segmented by DNAcopy/cbs
GSM371061	GSE14819	GPL8175	19861460	-0.15	0.15	log value from GEO, segmented by DNAcopy/cbs
GSM371062	GSE14819	GPL8175	19861460	-0.15	0.15	log value from GEO, segmented by DNAcopy/cbs
GSM371063	GSE14820	GPL8175	19861460	-0.15	0.15	log value from GEO, segmented by DNAcopy/cbs
GSM371064	GSE14820	GPL8175	19861460	-0.15	0.15	log value from GEO, segmented by DNAcopy/cbs
GSM371065	GSE14820	GPL8175	19861460	-0.15	0.15	log value from GEO, segmented by DNAcopy/cbs
GSM371066	GSE14820	GPL8175	19861460	-0.15	0.15	log value from GEO, segmented by DNAcopy/cbs
GSM371067	GSE14820	GPL8175	19861460	-0.15	0.15	log value from GEO, segmented by DNAcopy/cbs
GSM371068	GSE14820	GPL8175	19861460	-0.15	0.15	log value from GEO, segmented by DNAcopy/cbs
GSM371069	GSE14820	GPL8175	19861460	-0.15	0.15	log value from GEO, segmented by DNAcopy/cbs
GSM371070	GSE14820	GPL8175	19861460	-0.15	0.15	log value from GEO, segmented by DNAcopy/cbs
GSM371071	GSE14821	GPL8175	19861460	-0.15	0.15	log value from GEO, segmented by DNAcopy/cbs
GSM371072	GSE14821	GPL8175	19861460	-0.15	0.15	log value from GEO, segmented by DNAcopy/cbs
GSM371073	GSE14821	GPL8175	19861460	-0.15	0.15	log value from GEO, segmented by DNAcopy/cbs
GSM371074	GSE14821	GPL8175	19861460	-0.15	0.15	log value from GEO, segmented by DNAcopy/cbs
[truncated: 27,907 more rows]
