# Supplementary material for: arrayMap: A Reference Resource for Genomic Copy Number Imbalances in Human Malignancies
Source: PLoS One. 2012 May 18;7(5):e36944. doi: 10.1371/journal.pone.0036944 (PMC3356349; doi:10.1371/journal.pone.0036944)
Supplement: Table S6 — Normal tissue reference arrays for Affymetrix platforms. (XLS) [file pone.0036944.s011.xls]

## Sheet: Reference Arrays
Supplementary Table S6: Normal tissue reference arrays for Affymetrix platforms
Affymetrix platform	GSM_ID
GenomeWideSNP_6	GSM397671
	GSM397705
	GSM397707
	GSM397727
	GSM397731
	GSM397745
	GSM397747
	GSM397748
	GSM397750
	GSM397752
	GSM397760
	GSM397762
	GSM397766
	GSM397767
	GSM397778
	GSM397794
	GSM397807
	GSM397808
	GSM397814
	GSM397821
	GSM397822
	GSM397823
	GSM397824
	GSM397826
	GSM397831
	GSM397833
	GSM397834
	GSM397835
	GSM397838
	GSM457680
	GSM457682
	GSM457686
	GSM457688
	GSM457690
	GSM457693
	GSM457708
	GSM457712
	GSM457714
	GSM457716
	GSM457719
	GSM457721
	GSM457723
	GSM457731
	GSM457741
	GSM457747
	GSM457750
	GSM540611
	GSM540624
	GSM540625
	GSM540640
Mapping250K_Nsp	GSM317821
	GSM317824
	GSM353474
	GSM353475
	GSM353476
	GSM353477
	GSM353478
	GSM353479
	GSM353480
	GSM353481
	GSM353489
	GSM353491
	GSM353493
	GSM393578
	GSM393579
	GSM503448
	GSM503449
	GSM503452
	GSM503455
	GSM503456
	GSM503457
	GSM503459
	GSM503460
	GSM503461
	GSM503462
	GSM503463
	GSM503465
	GSM503467
	GSM503468
	GSM503469
	GSM503472
	GSM503473
	GSM503672
	GSM503673
	GSM503674
	GSM503675
	GSM503678
	GSM503682
	GSM503683
	GSM503686
	GSM503689
	GSM503690
	GSM503691
	GSM503693
	GSM503694
	GSM503695
	GSM503696
	GSM503697
	GSM503698
	GSM503699
Mapping250K_Sty	GSM372871
	GSM372872
	GSM372875
	GSM372876
	GSM372877
	GSM372878
	GSM372880
	GSM372881
	GSM372882
	GSM372883
	GSM372884
	GSM372885
	GSM372886
	GSM372887
	GSM372889
	GSM372892
	GSM372893
	GSM372894
	GSM372896
	GSM372897
	GSM372898
	GSM374507
	GSM374517
	GSM374518
	GSM374520
	GSM374524
	GSM374525
	GSM374526
	GSM374527
	GSM503534
	GSM503541
	GSM503542
	GSM503543
	GSM503546
	GSM503550
	GSM503551
	GSM503553
	GSM503554
	GSM503555
	GSM503556
	GSM503557
	GSM503558
	GSM503559
	GSM503560
	GSM503563
	GSM529110
	GSM529112
	GSM529113
	GSM529115
	GSM529129
Mapping50K_Hind240	GSM173736
	GSM173737
	GSM173738
	GSM173739
	GSM173742
	GSM173743
	GSM173744
	GSM173745
	GSM173755
	GSM173756
	GSM173757
	GSM173760
	GSM173761
	GSM173762
	GSM173767
	GSM173768
	GSM173774
	GSM173775
	GSM173777
	GSM173778
	GSM173779
	GSM173780
	GSM173782
	GSM173785
	GSM173787
	GSM173793
	GSM173794
	GSM173795
	GSM173799
	GSM173800
	GSM173804
	GSM173805
	GSM174872
	GSM190405
	GSM190406
	GSM190407
	GSM190408
	GSM248616
	GSM248617
	GSM248619
	GSM248620
	GSM248621
	GSM248623
	GSM248624
	GSM248629
	GSM248640
Mapping50K_Xba240	GSM288038
	GSM288048
	GSM288050
	GSM288052
	GSM288054
	GSM288056
	GSM288058
	GSM288060
	GSM288062
	GSM288068
	GSM288070
	GSM288072
	GSM288076
	GSM288078
	GSM288082
	GSM288084
	GSM288086
	GSM288092
	GSM288094
	GSM288096
	GSM288100
	GSM288104
	GSM288106
	GSM288108
	GSM288118
	GSM288122
	GSM288124
	GSM288126
	GSM288128
	GSM288136
	GSM288142
	GSM288146
	GSM288152
	GSM288158
	GSM288160
	GSM288164
	GSM288166
	GSM288178
	GSM288184
	GSM288186
	GSM288192
	GSM288194
	GSM288198
	GSM288204
	GSM288206
	GSM288210
	GSM288214
	GSM288216
	GSM288218
	GSM288222
Mapping10K_Xba131	GSM85243
	GSM85244
	GSM85245
	GSM85249
	GSM85251
	GSM85255
	GSM85257
	GSM85264
	GSM85265
	GSM85266
	GSM85267
	GSM488268
	GSM488269
	GSM488270
	GSM488273
	GSM488274
	GSM488275
	GSM488276
	GSM488277
	GSM488280
	GSM488281
	GSM488282
	GSM488283
	GSM488284
	GSM488286
	GSM488289
	GSM488290
	GSM488291
	GSM488292
	GSM488296
	GSM488297
	GSM488299
	GSM488301
	GSM488303
Mapping10K_Xba142	GSM163110
	GSM163128
	GSM163152
	GSM163163
	GSM163182
	GSM163207
	GSM163234
	GSM163240
	GSM163246
	GSM163247
	GSM163259
	GSM163268
	GSM163283
	GSM163305
	GSM163323
	GSM163325
	GSM163343
	GSM163354
	GSM163370
	GSM163373
	GSM163388
	GSM163407
	GSM163417
	GSM163424
	GSM163426
	GSM163442
	GSM163462
	GSM163466
	GSM163478
	GSM163494
	GSM163515
	GSM163516
	GSM163537
	GSM163538
	GSM163547
	GSM163566
	GSM163579
	GSM163600
	GSM163613
	GSM163723
	GSM163744
	GSM163767
	GSM163823
	GSM163837
	GSM163848
	GSM216336
	GSM216343
	GSM243156
	GSM438329
	GSM438345
